# Supplementary material for: Synthesis and Cytotoxicity Evaluation of Spirocyclic Bromotyrosine Clavatadine C Analogs
Source: MDPI journal article supplement (doi:10.3390/md19070400), 2021-07-20

# Supporting Information

## Synthesis and Cytotoxicity Evaluation of Spirocyclic Bromotyrosine Clavatadine C Analogs

Piyush A. Patel,<sup>1</sup> Tanja Bruun,<sup>1</sup> Polina Ilina,<sup>2</sup> Heidi Mäkkylä,<sup>2</sup> Antti Lempinen,<sup>1</sup>  
Jari Yli-Kauhaluoma,<sup>1</sup> Päivi Tammela,<sup>2</sup> Paula S. Kiuru<sup>1\*</sup>

<sup>1</sup>Drug Research Program, Division of Pharmaceutical Chemistry and Technology, Faculty of Pharmacy, University of Helsinki, FI-00014 Helsinki, Finland, paula.kiuru@helsinki.fi

<sup>2</sup>Drug Research Program, Division of Pharmaceutical Biosciences, Faculty of Pharmacy, University of Helsinki, FI-00014 Finland

### 1. <sup>1</sup>H and <sup>13</sup>C NMR spectra of the compounds

S2

## 1. NMR spectra

<sup>1</sup>H NMR of clavatidine C TFA-salt, compound **1-TFA** in *d*<sub>6</sub>-DMSO (3.31 ppm)

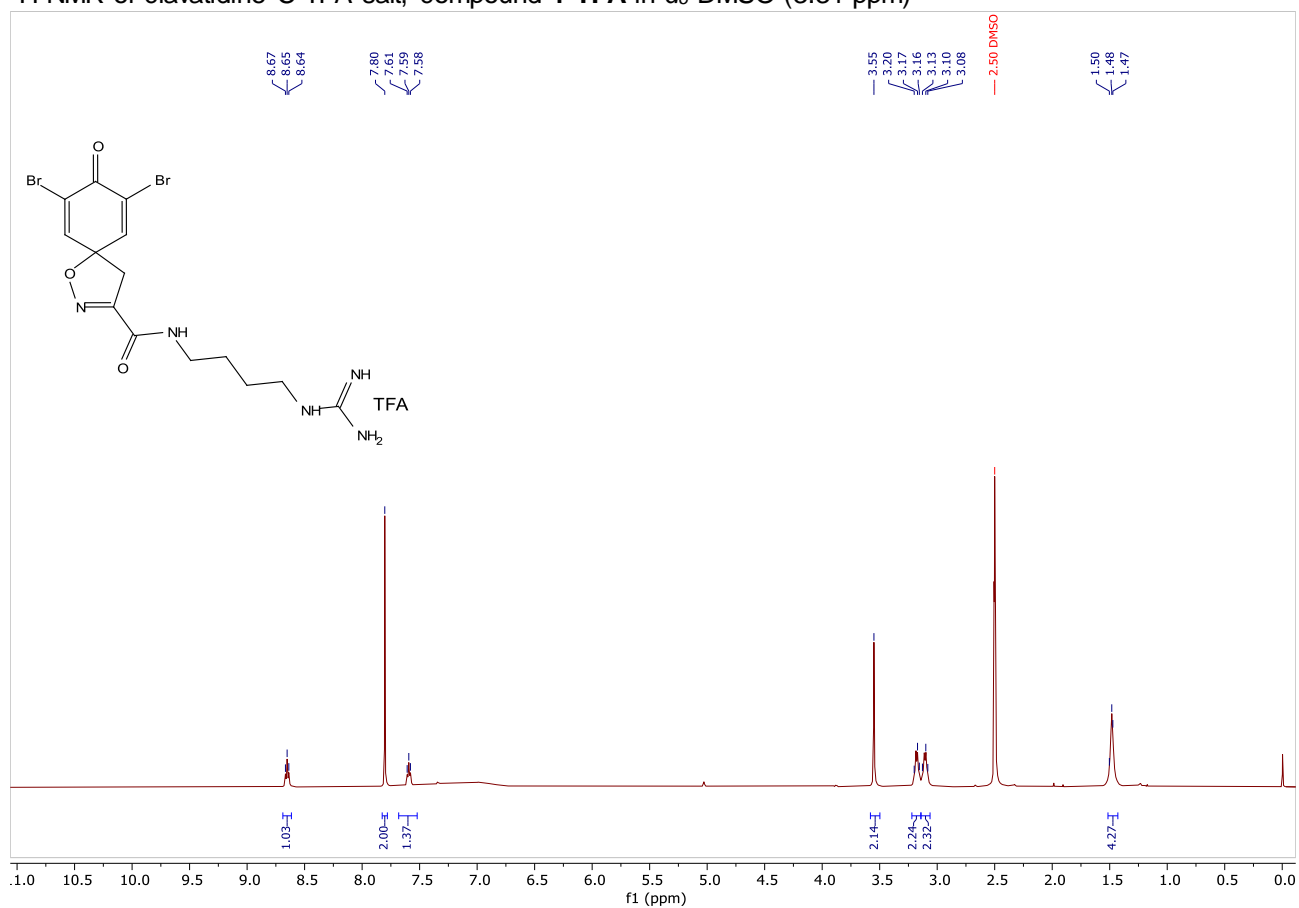

<sup>13</sup>C NMR of clavatidine C TFA-salt, compound **1-TFA** in *d*<sub>6</sub>-DMSO (39.52 ppm)

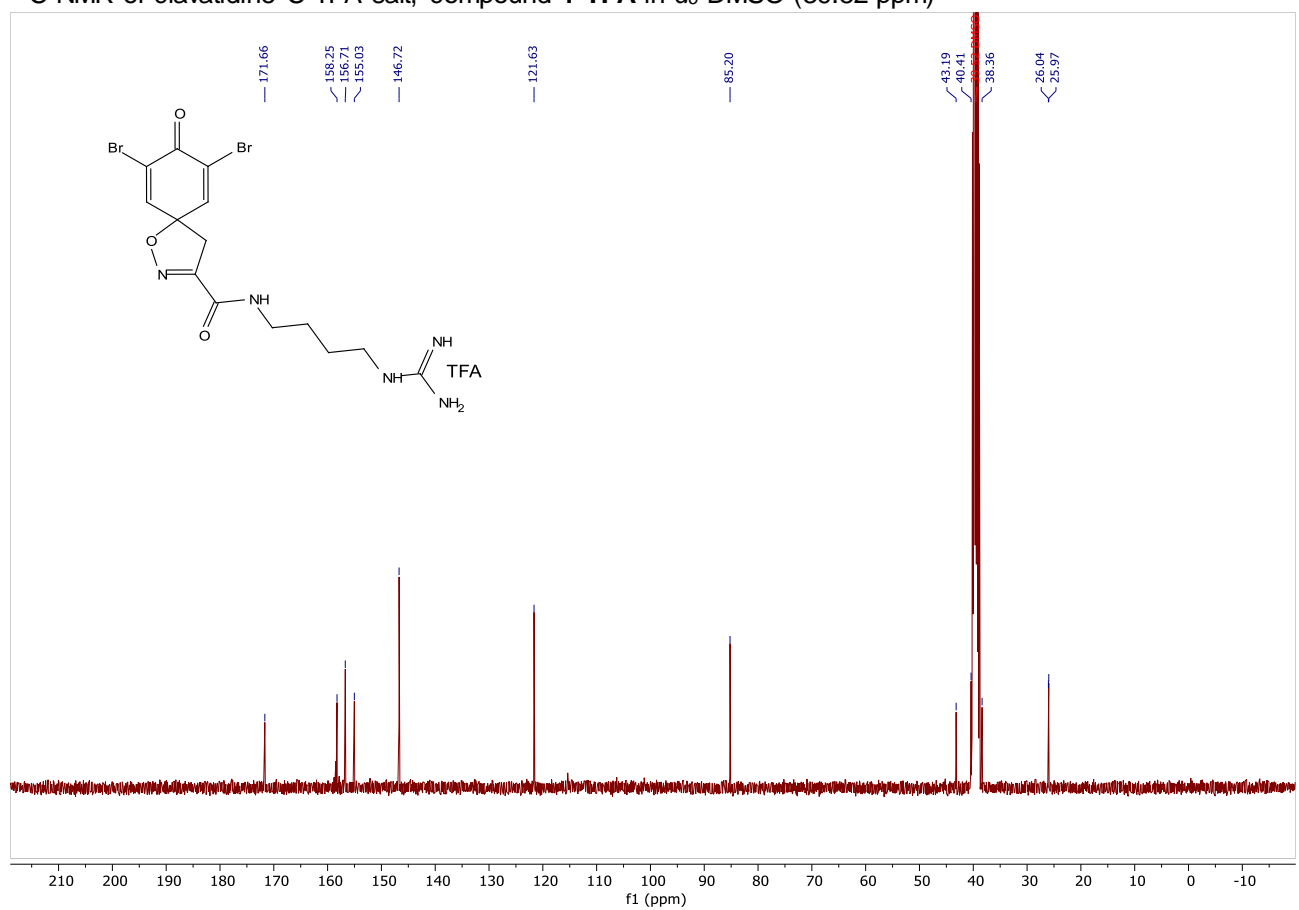

$^1\text{H}$  NMR of compound **11** in  $\text{CD}_3\text{OD}$  (3.31 ppm)

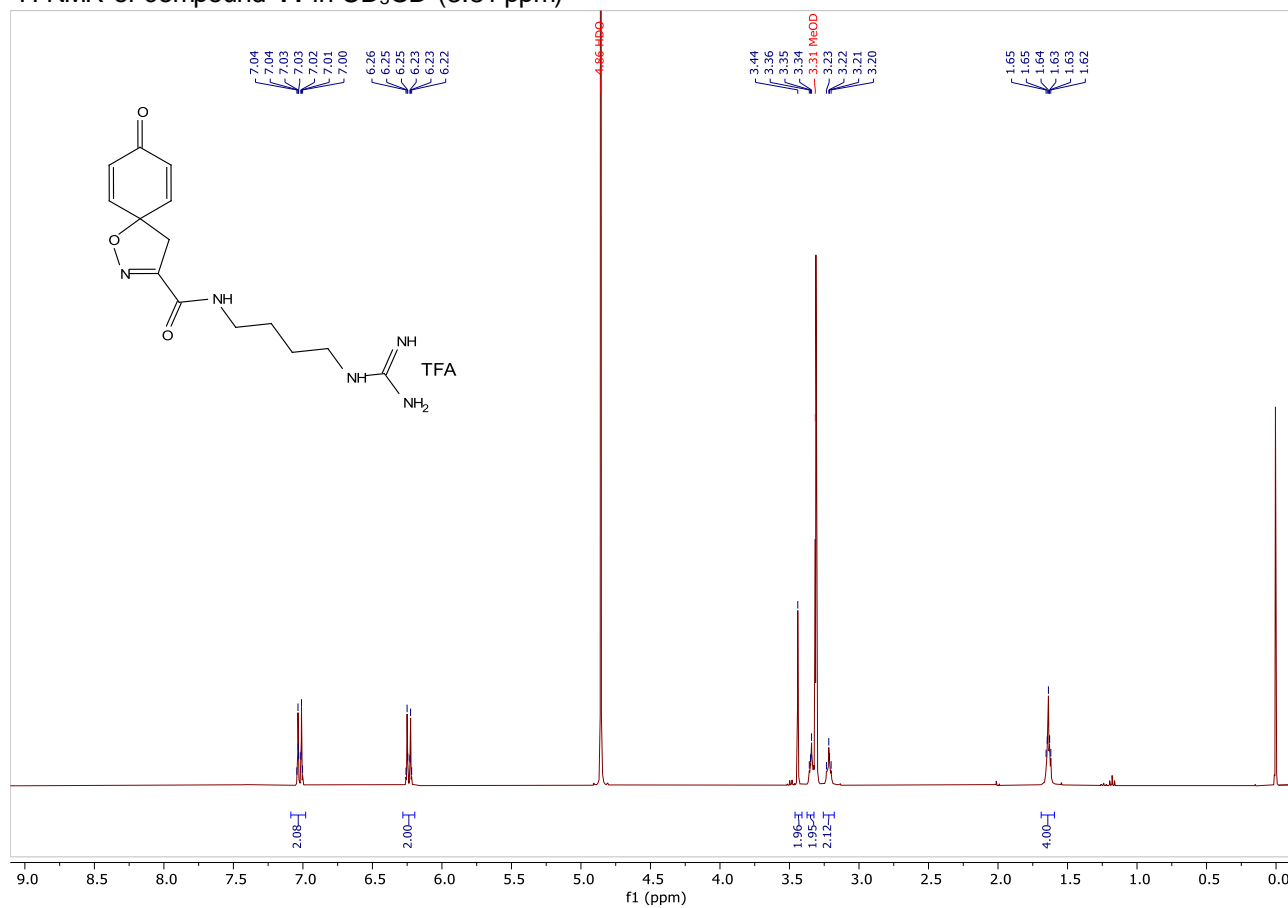

$^{13}\text{C}$  NMR of compound **11** in  $\text{CD}_3\text{OD}$  (49.00 ppm)

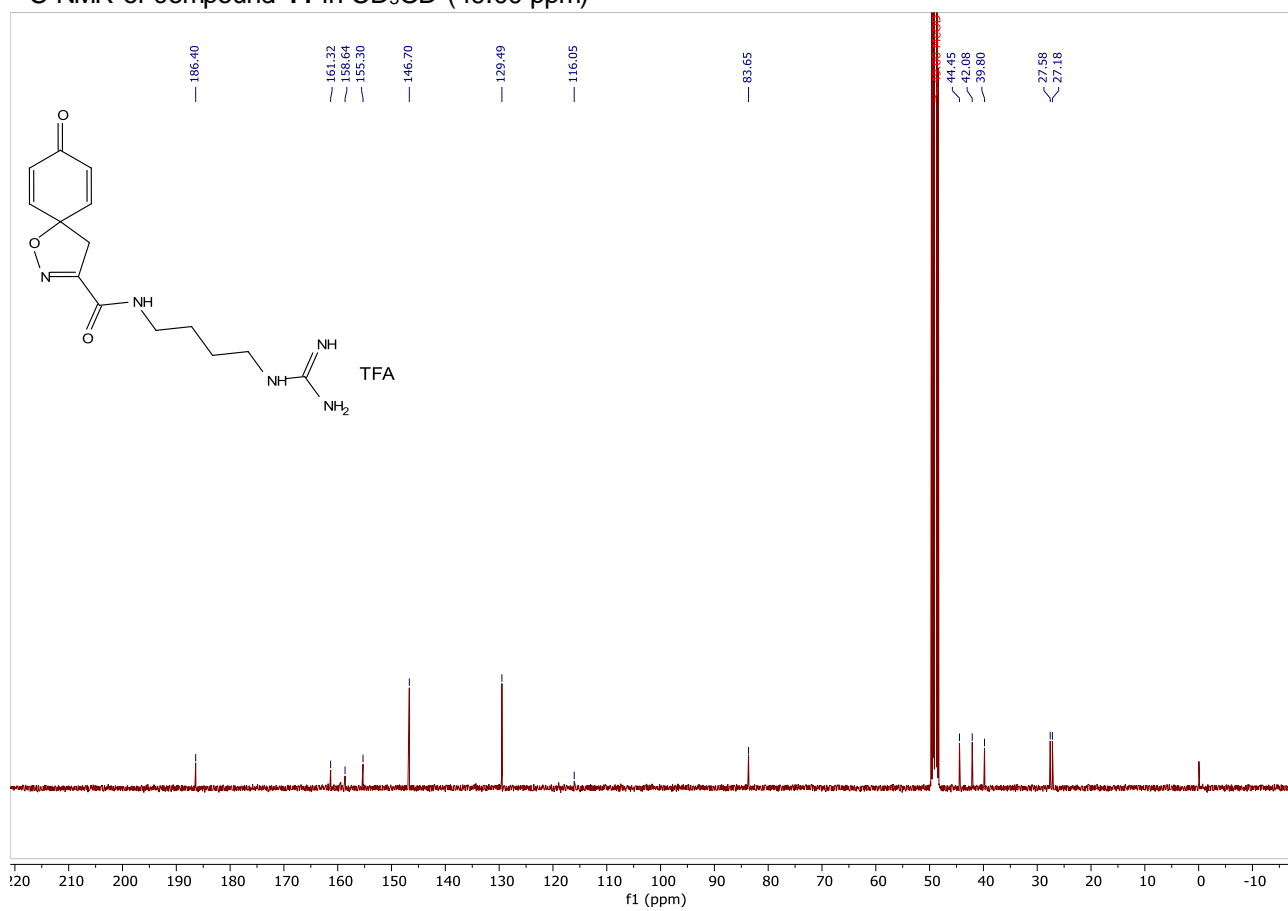

$^1\text{H}$  NMR of compound **12** in  $\text{CD}_3\text{OD}$  (3.31 ppm)

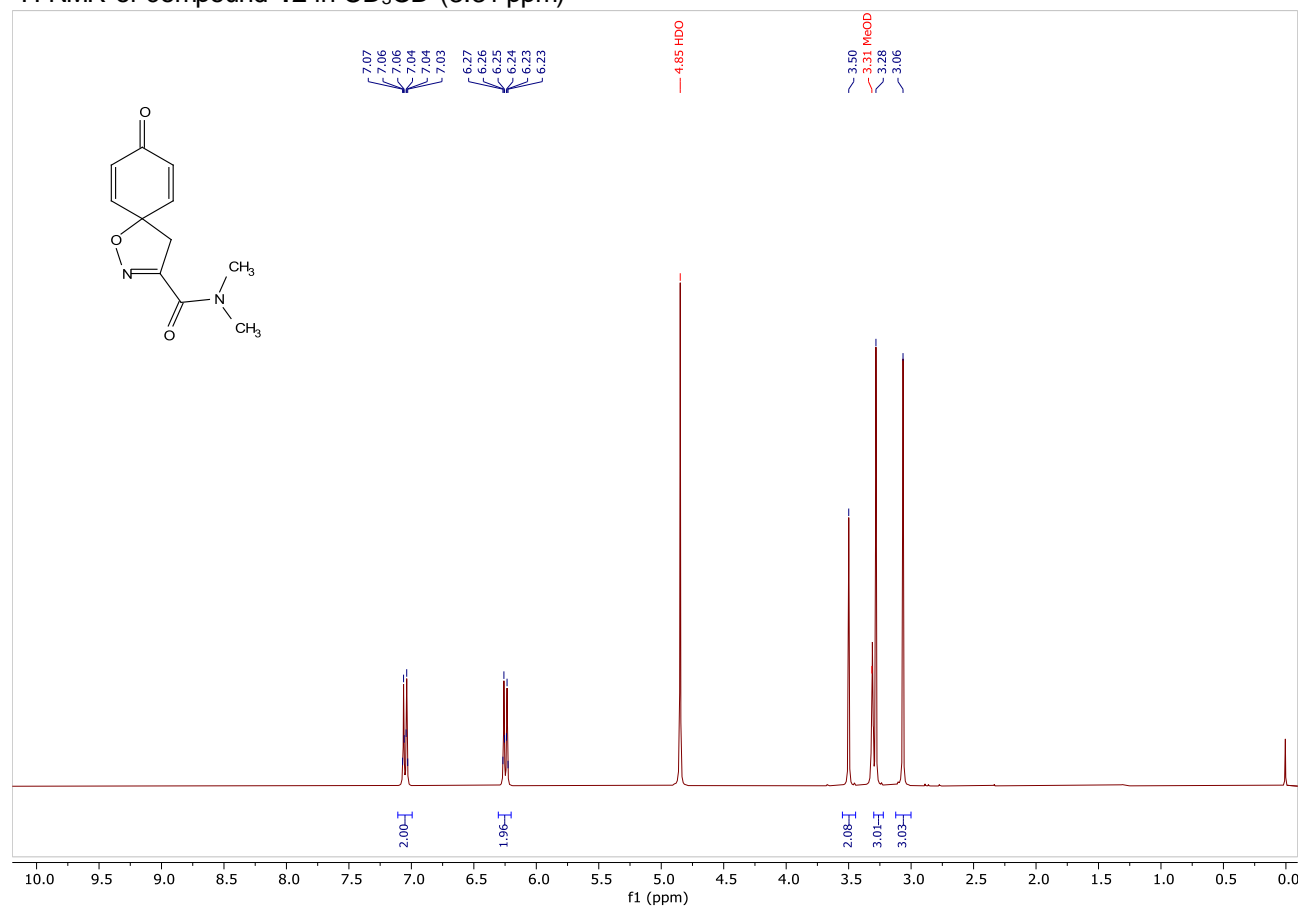

$^{13}\text{C}$  NMR of compound **12** in  $\text{CD}_3\text{OD}$  (49.00 ppm)

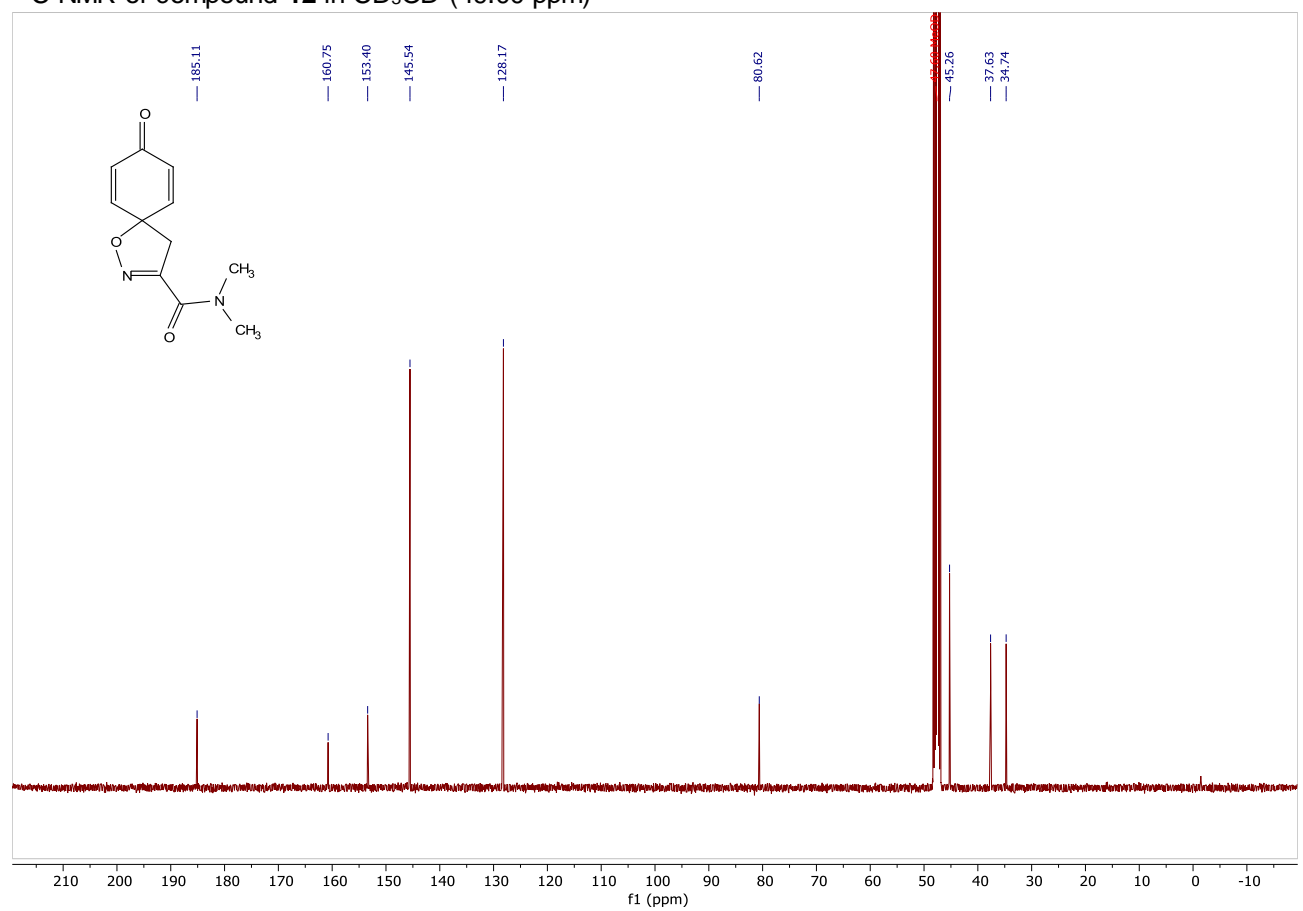

$^1\text{H}$  NMR of compound **13** in  $\text{CDCl}_3$  (7.26 ppm)

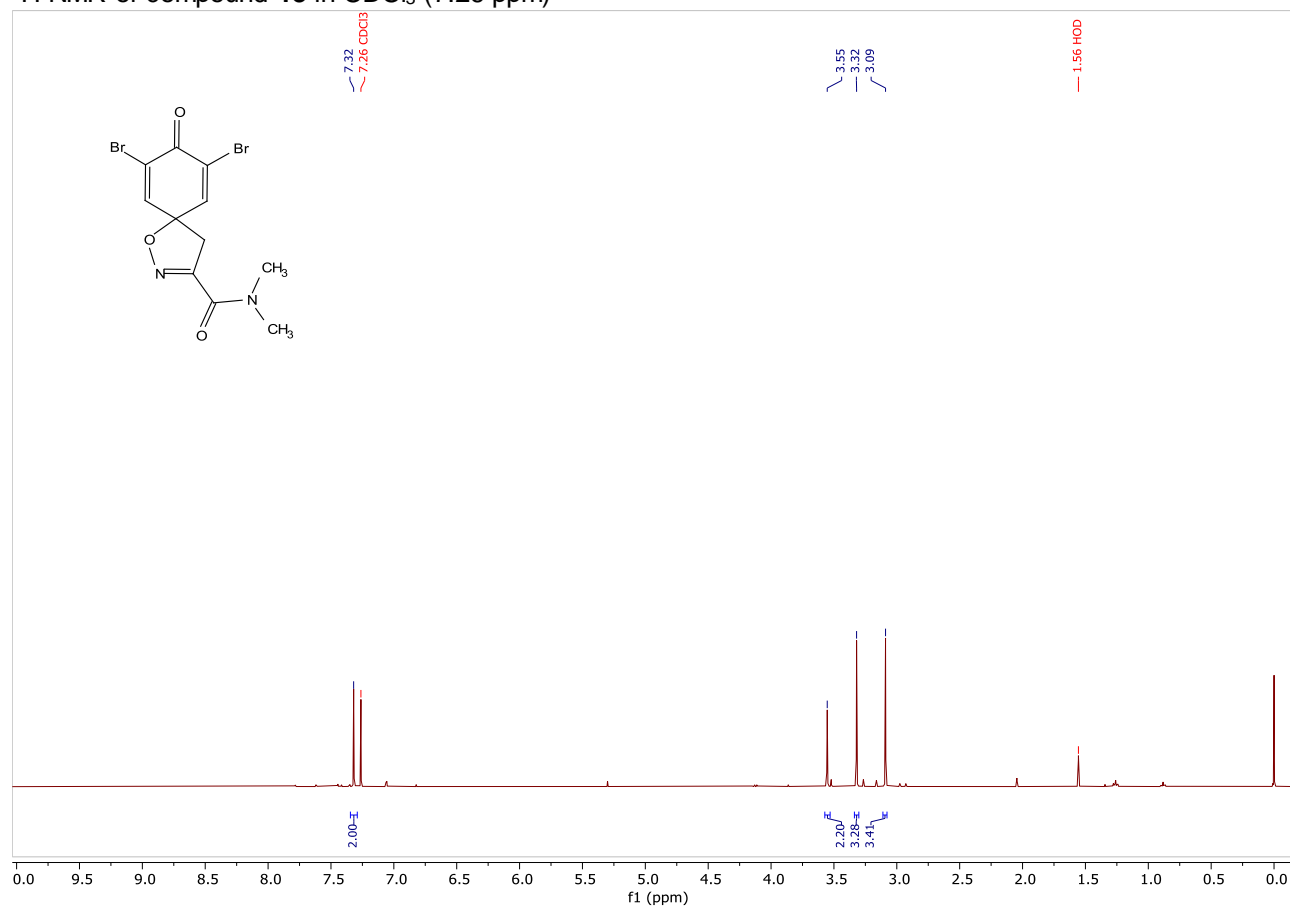

$^{13}\text{C}$  NMR of compound **13** in  $\text{CDCl}_3$  (77.16 ppm)

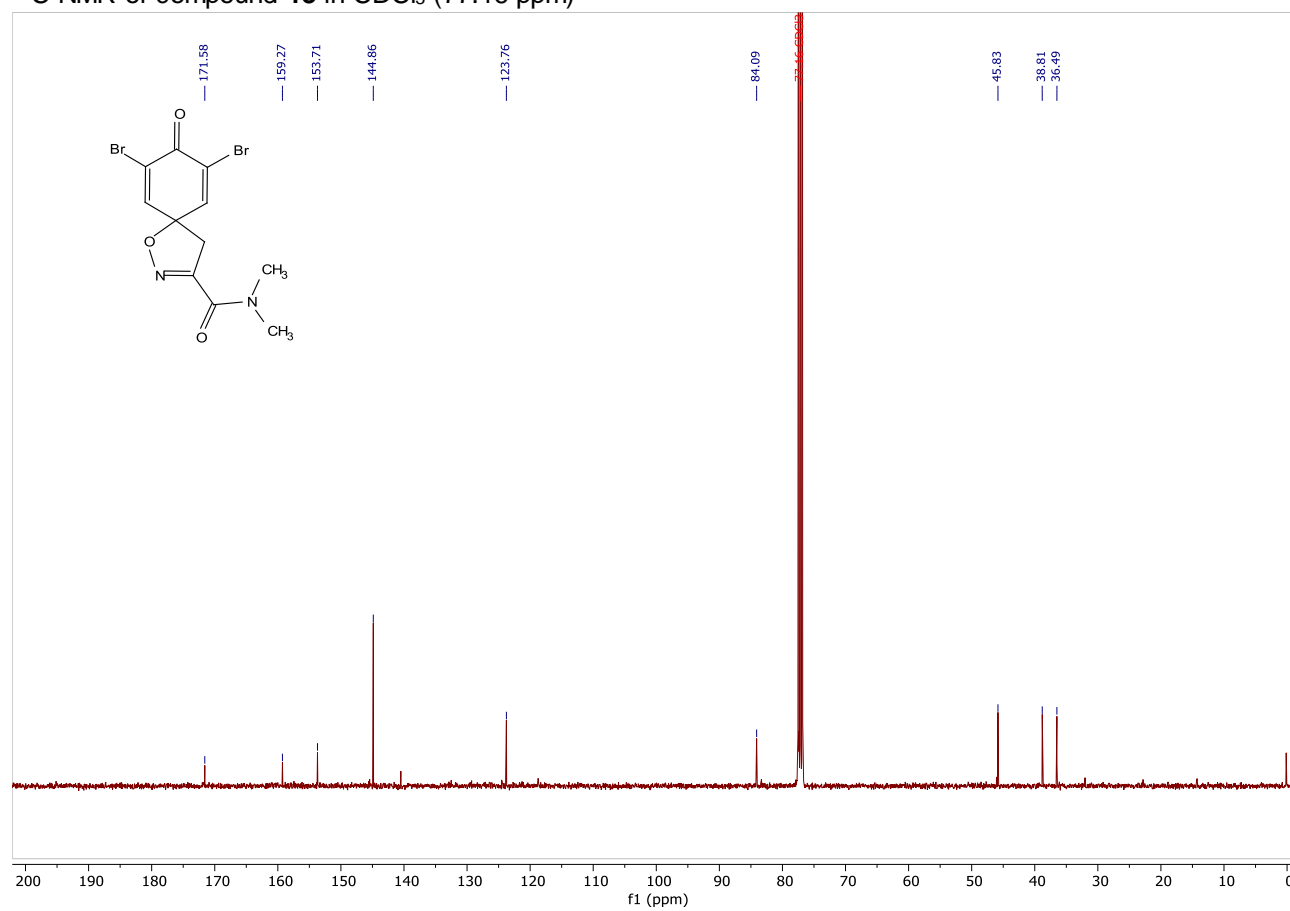

<sup>1</sup>H NMR of compound **14** in CDCl<sub>3</sub> (7.26 ppm)

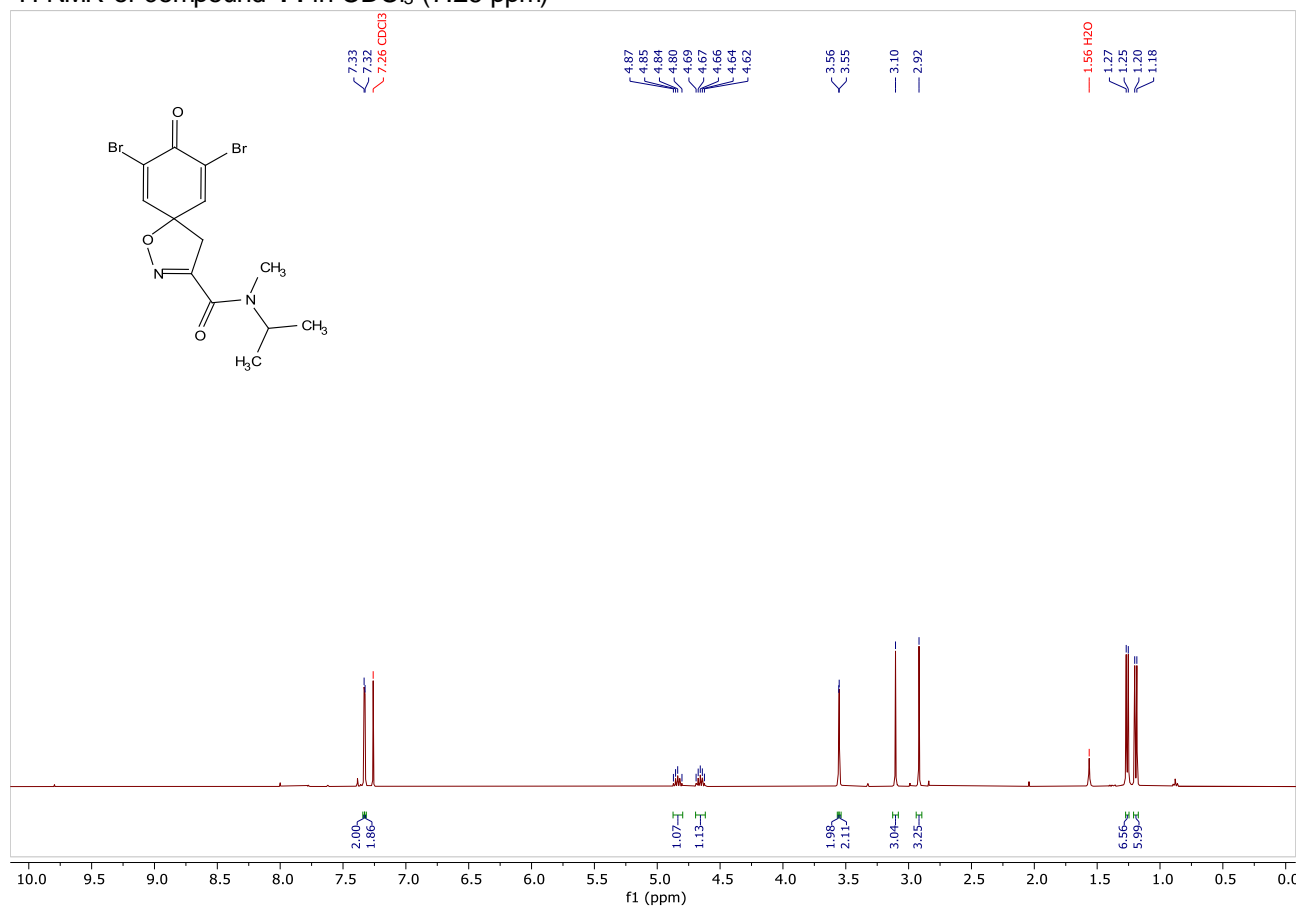

<sup>13</sup>C NMR of compound **14** in CDCl<sub>3</sub> (77.16 ppm)

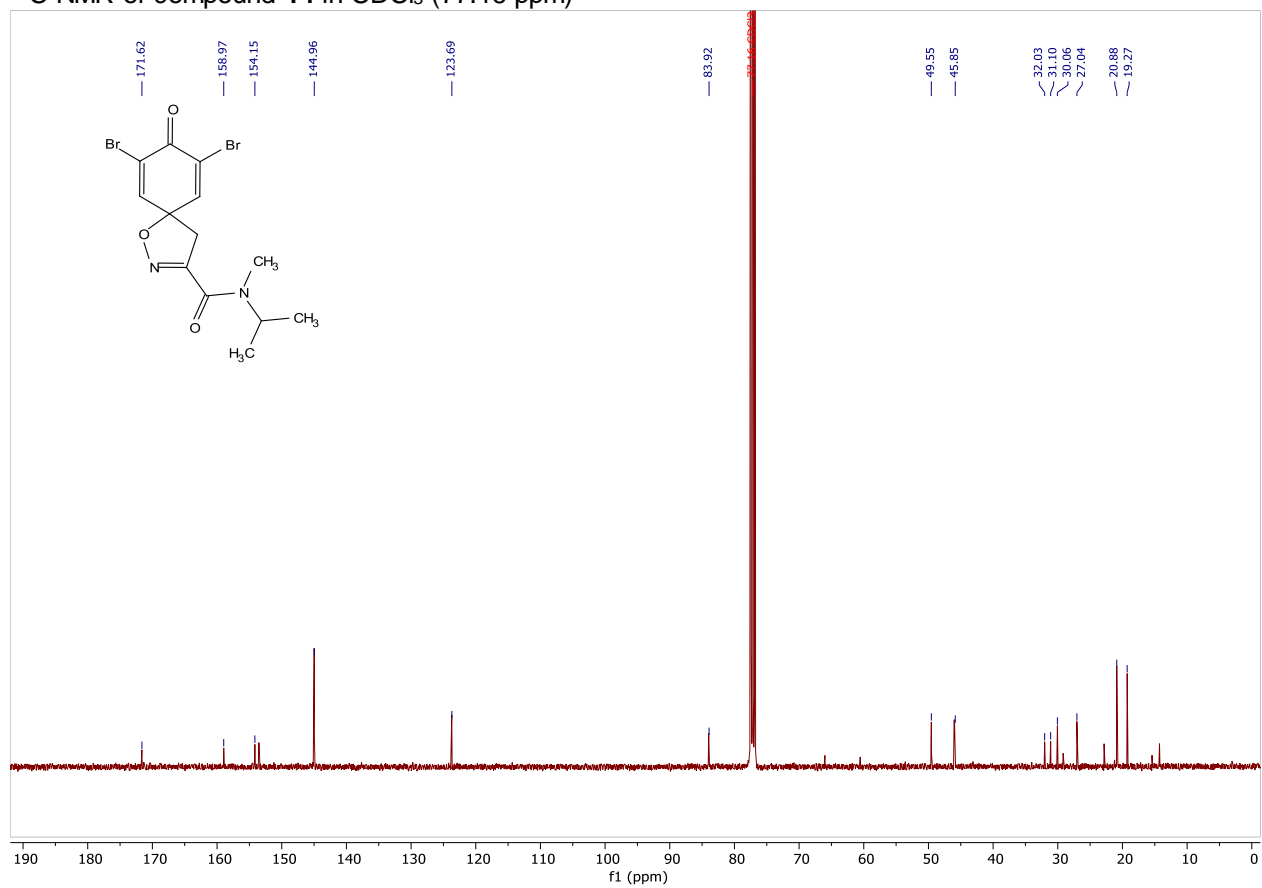

$^1\text{H}$  NMR of compound **15** in  $\text{CDCl}_3$  (7.26 ppm)

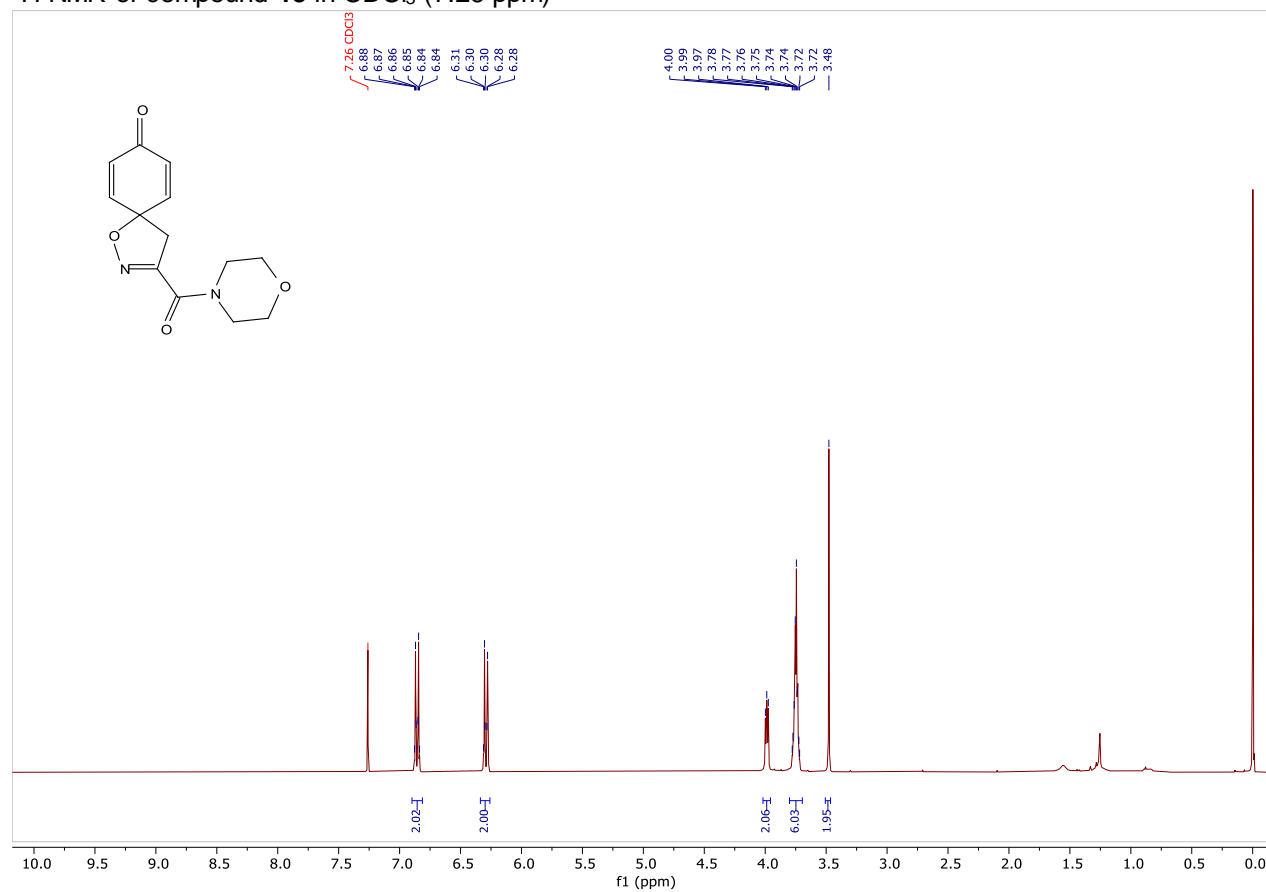

$^{13}\text{C}$  NMR of compound **15** in  $\text{CDCl}_3$  (77.16 ppm)

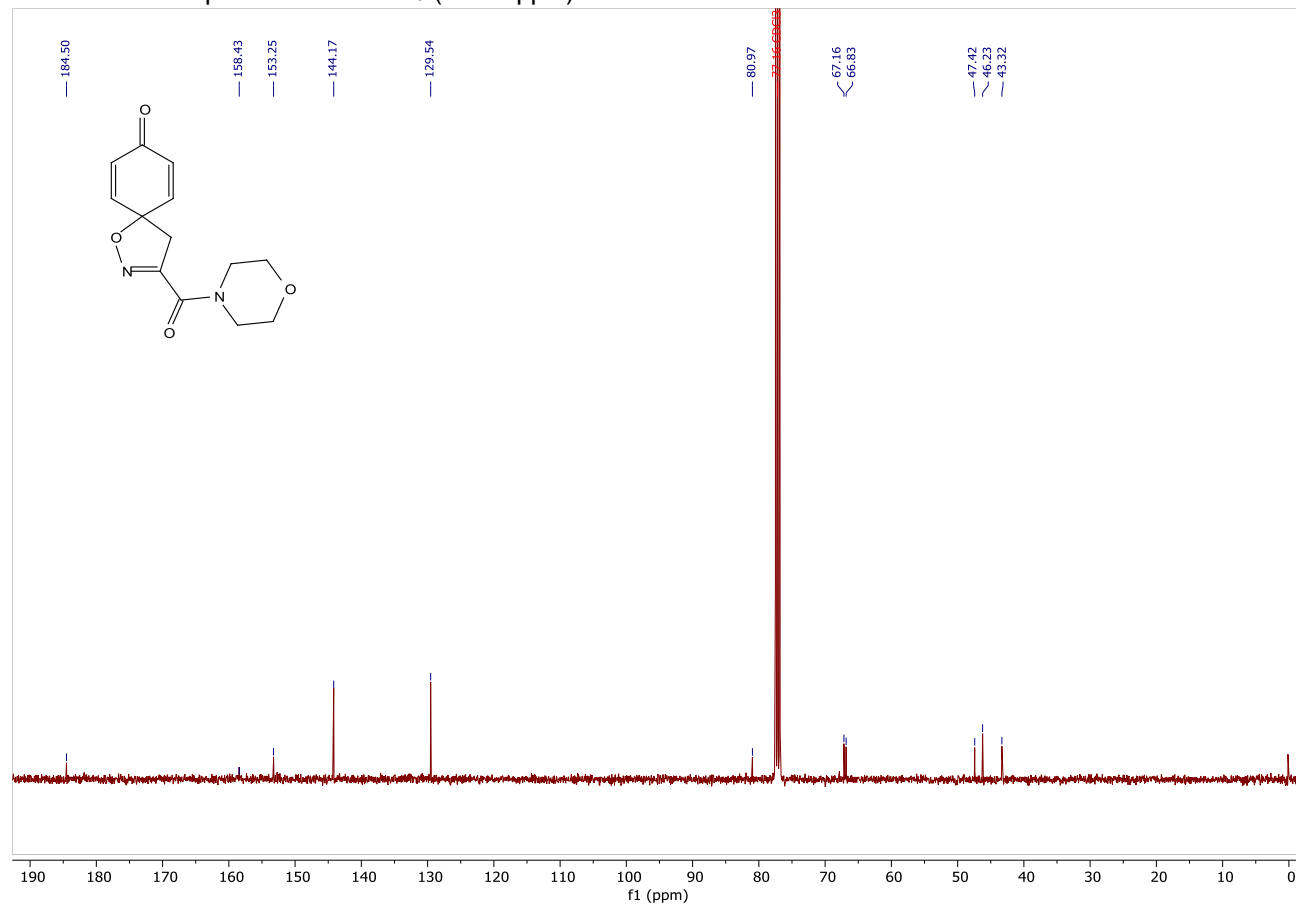

$^1\text{H}$  NMR of compound **16** in  $\text{CDCl}_3$  (7.26 ppm)

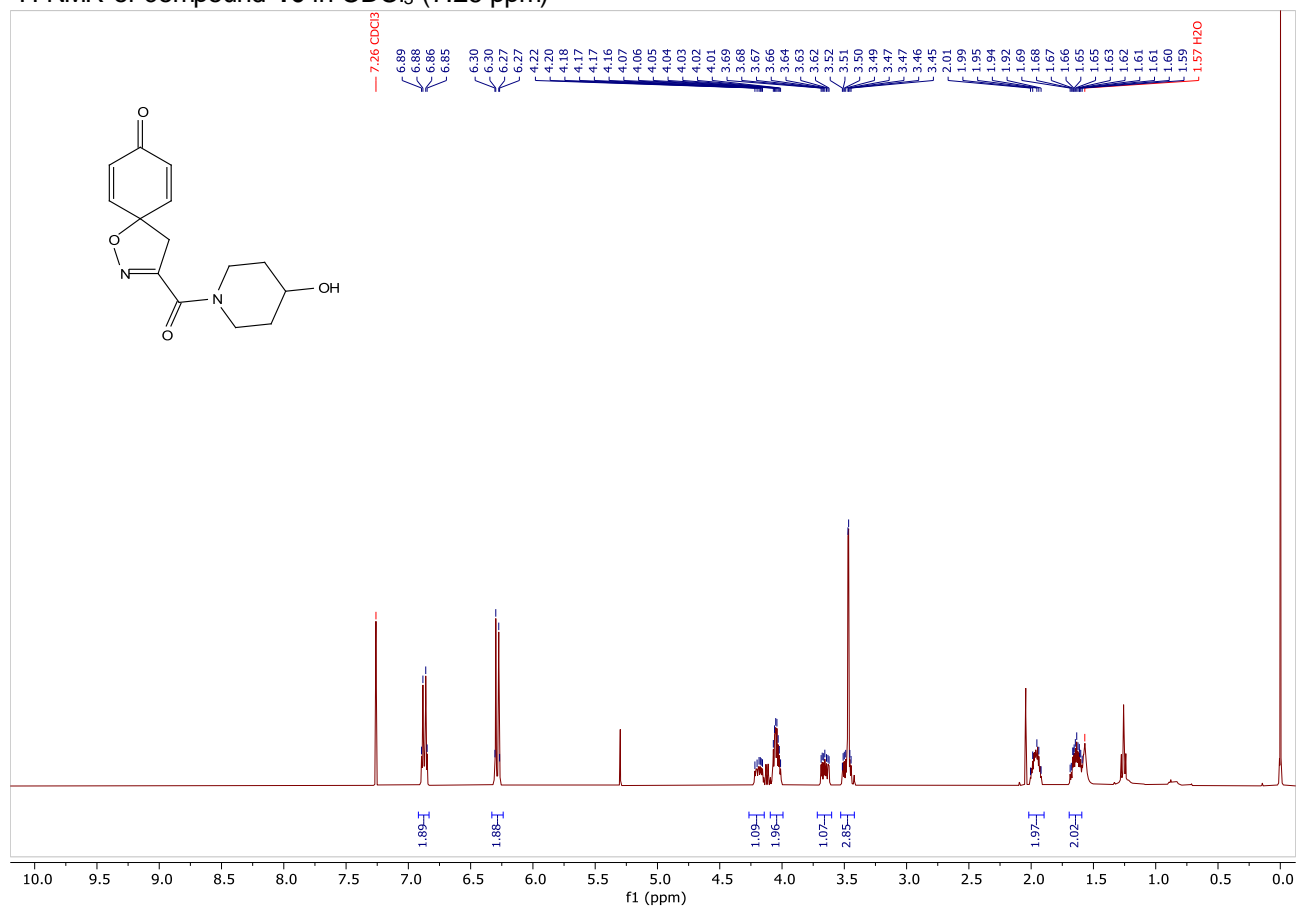

$^{13}\text{C}$  NMR of compound **16** in  $\text{CDCl}_3$  (77.16 ppm)

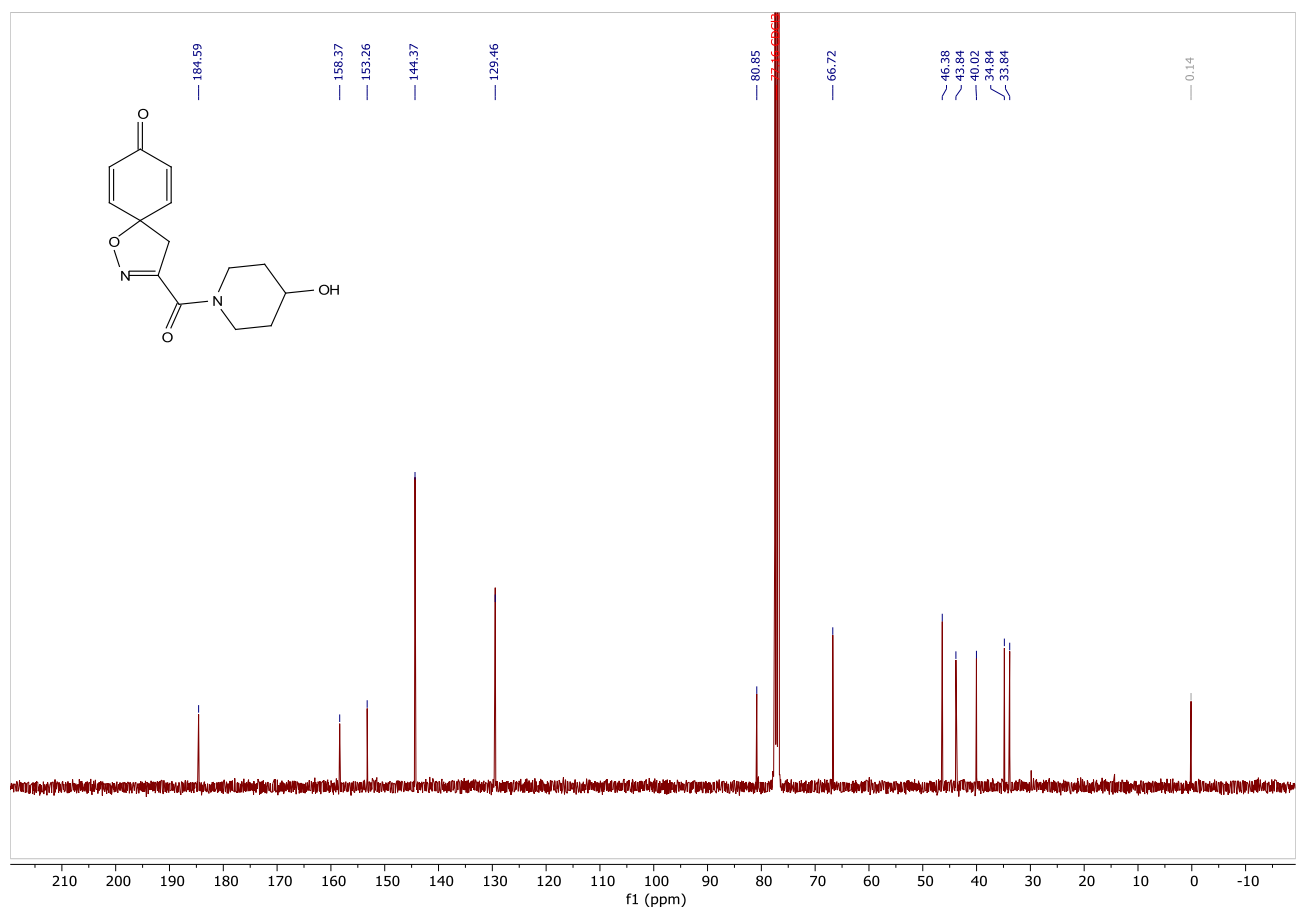



<sup>1</sup>H NMR of compound **17** in CD<sub>3</sub>OD (3.31 ppm)

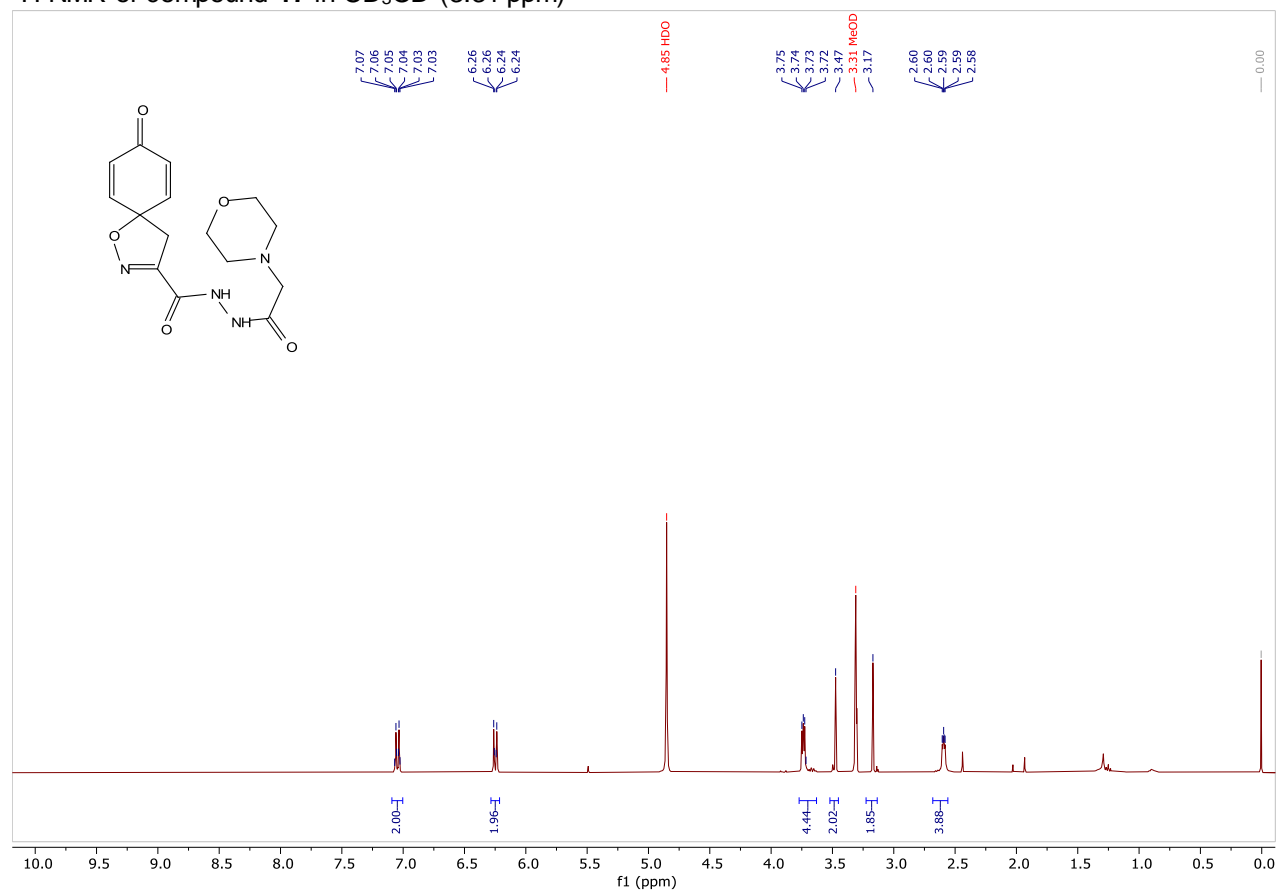

<sup>13</sup>C NMR of compound **17** in CD<sub>3</sub>OD (49.00 ppm)

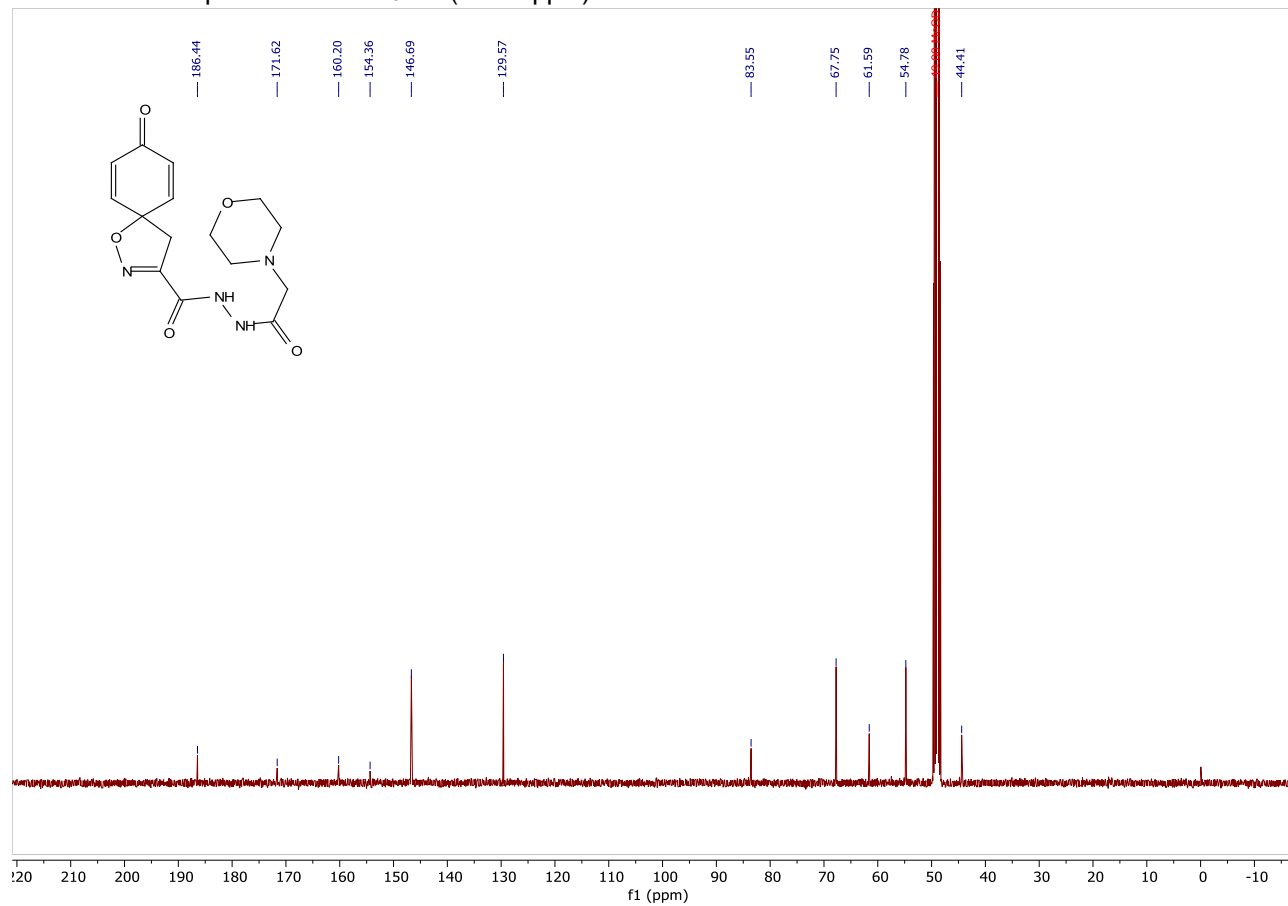

$^1\text{H}$  NMR of compound **18** in  $\text{CDCl}_3$  (7.26 ppm)

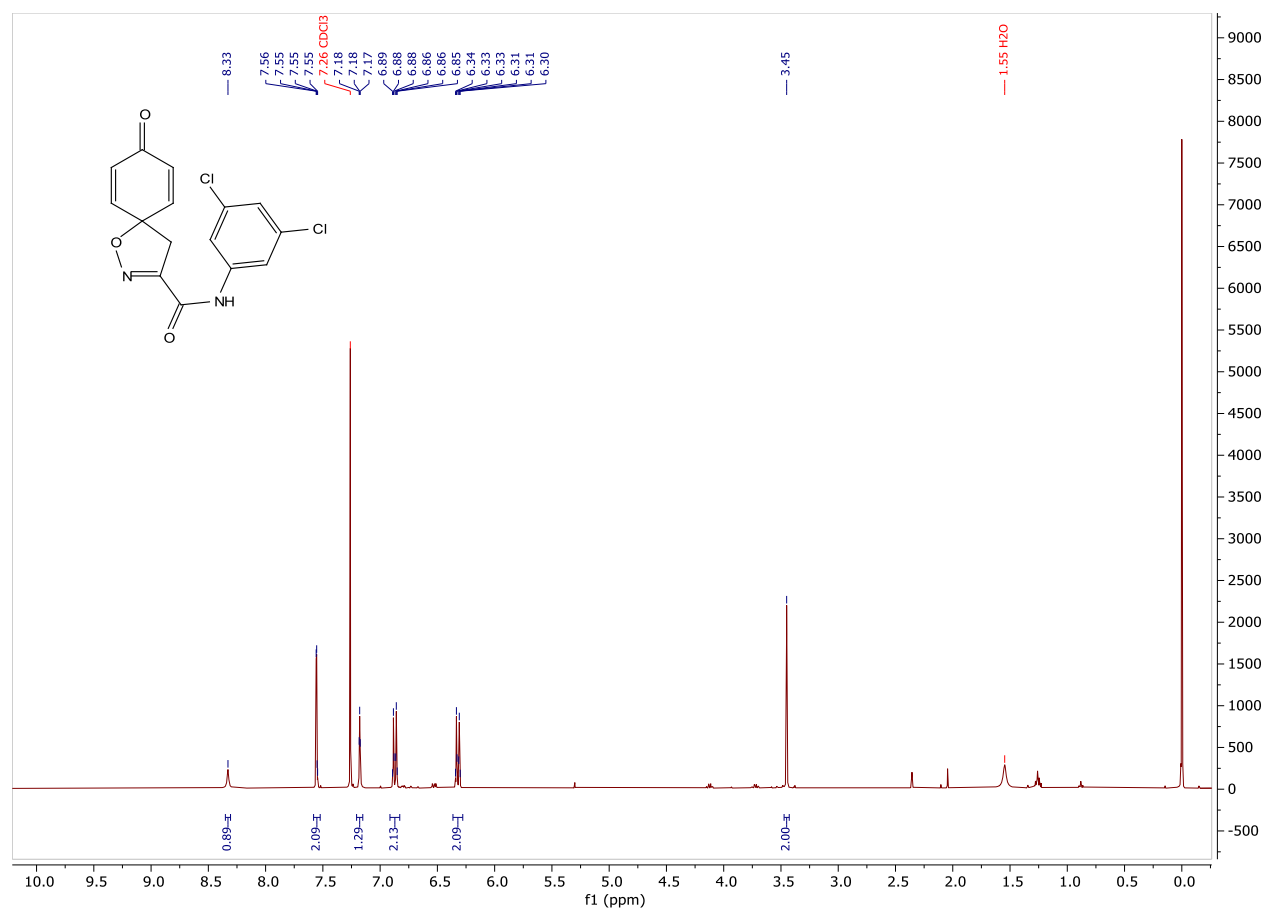

$^{13}\text{C}$  NMR of compound **18** in  $\text{CDCl}_3$  (77.16 ppm)

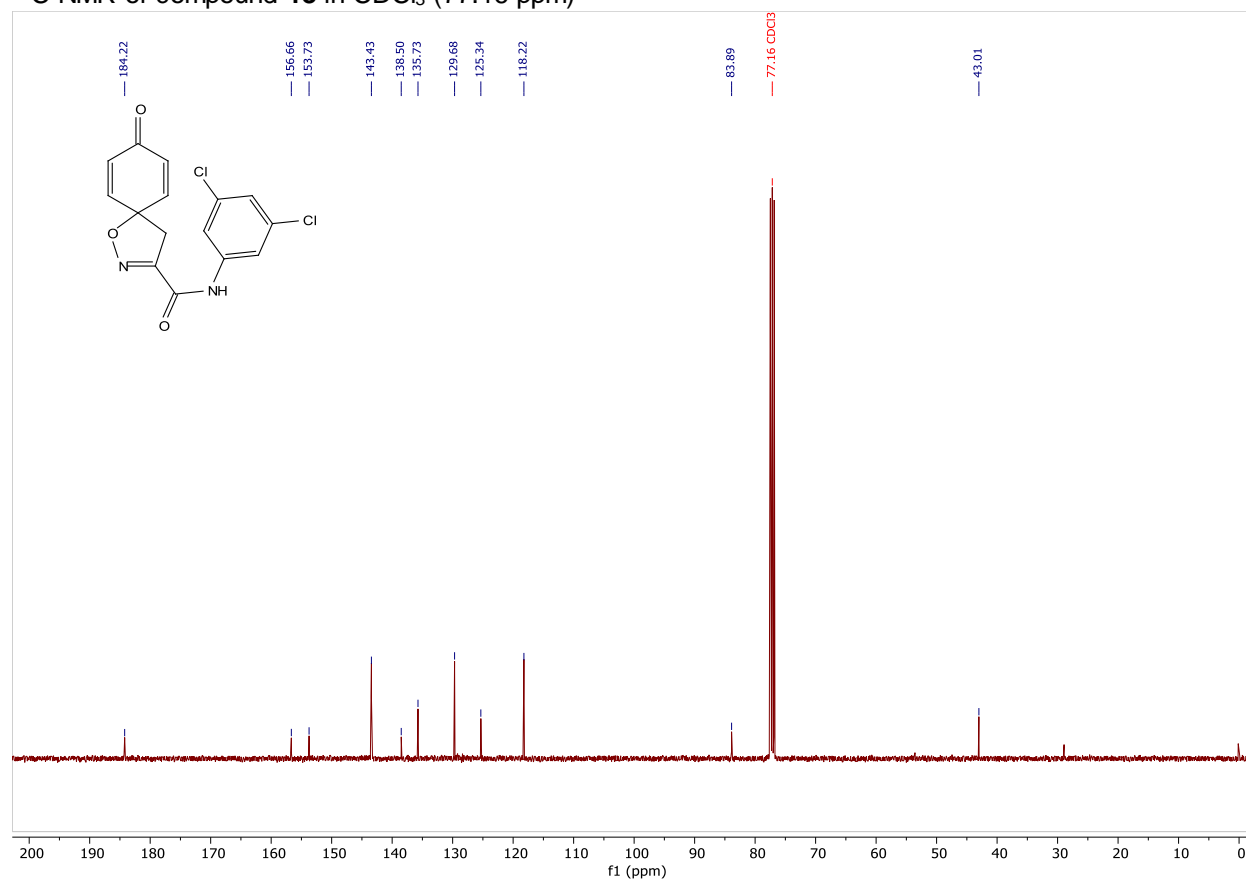

$^1\text{H}$  NMR of compound **19** in  $d_6$ -acetone (2.05 ppm)

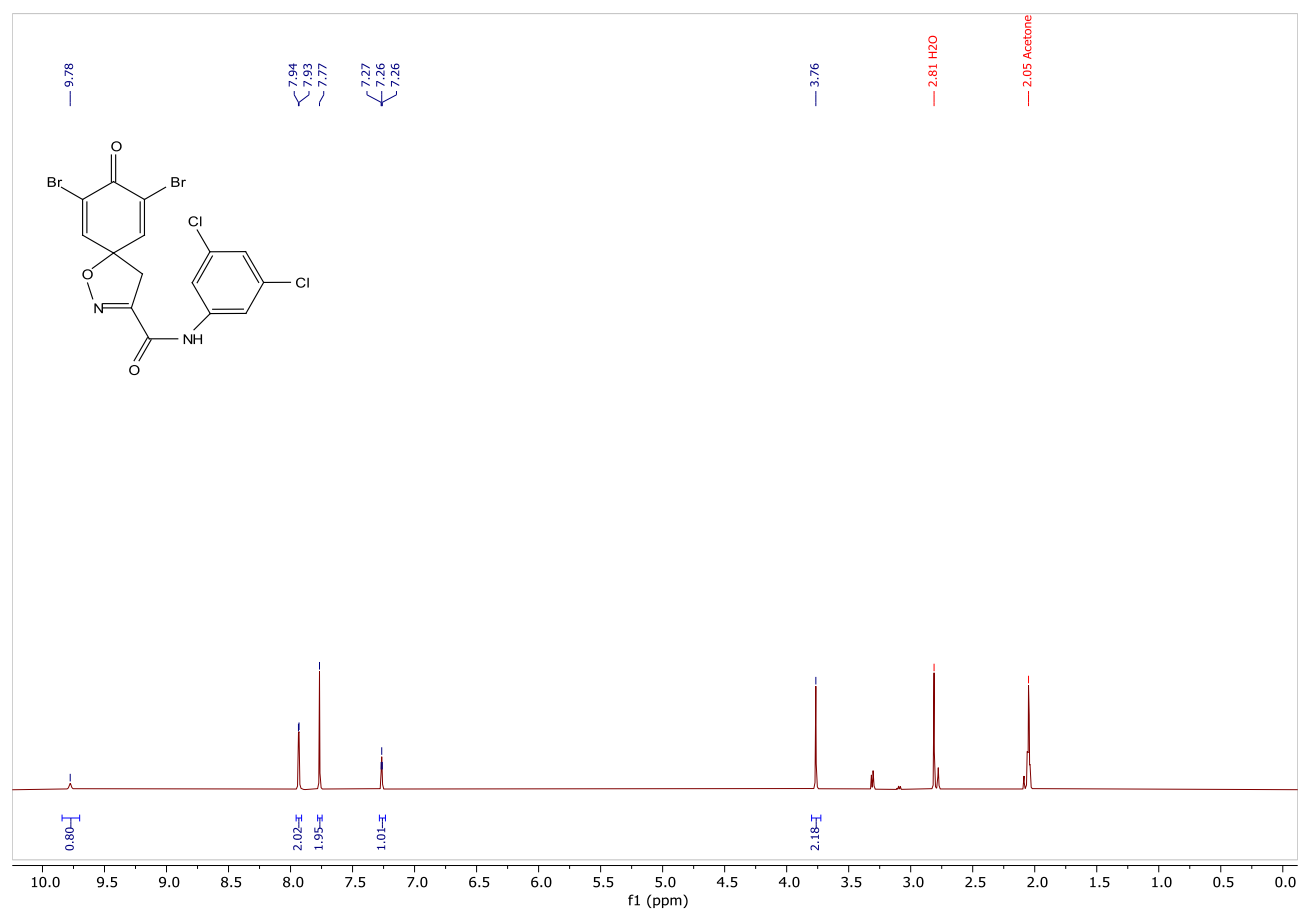

$^{13}\text{C}$  NMR of compound **19** in  $d_6$ -acetone (29.84 ppm)

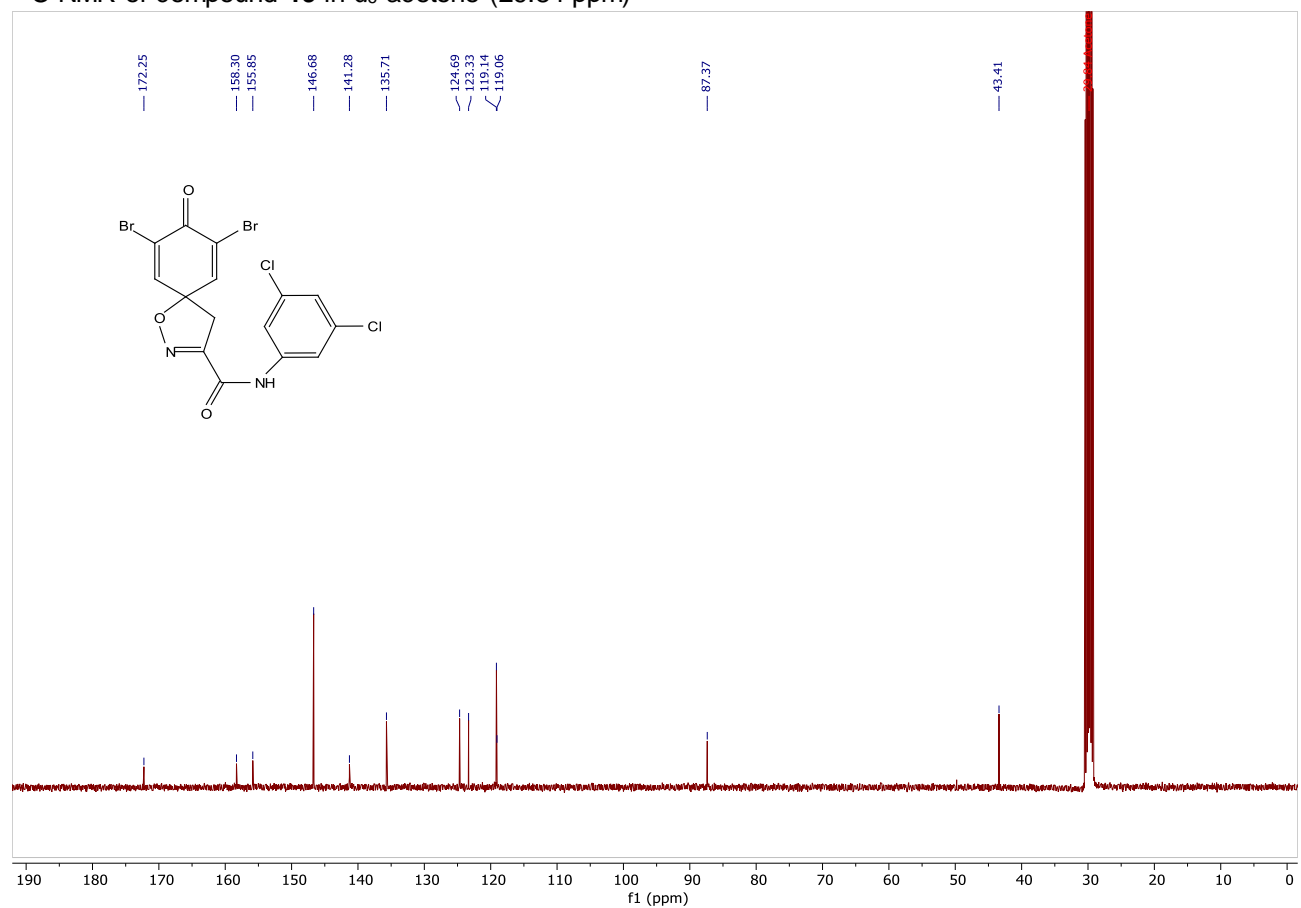

$^1\text{H}$  NMR of compound **20** in  $\text{CDCl}_3$  (7.26 ppm)

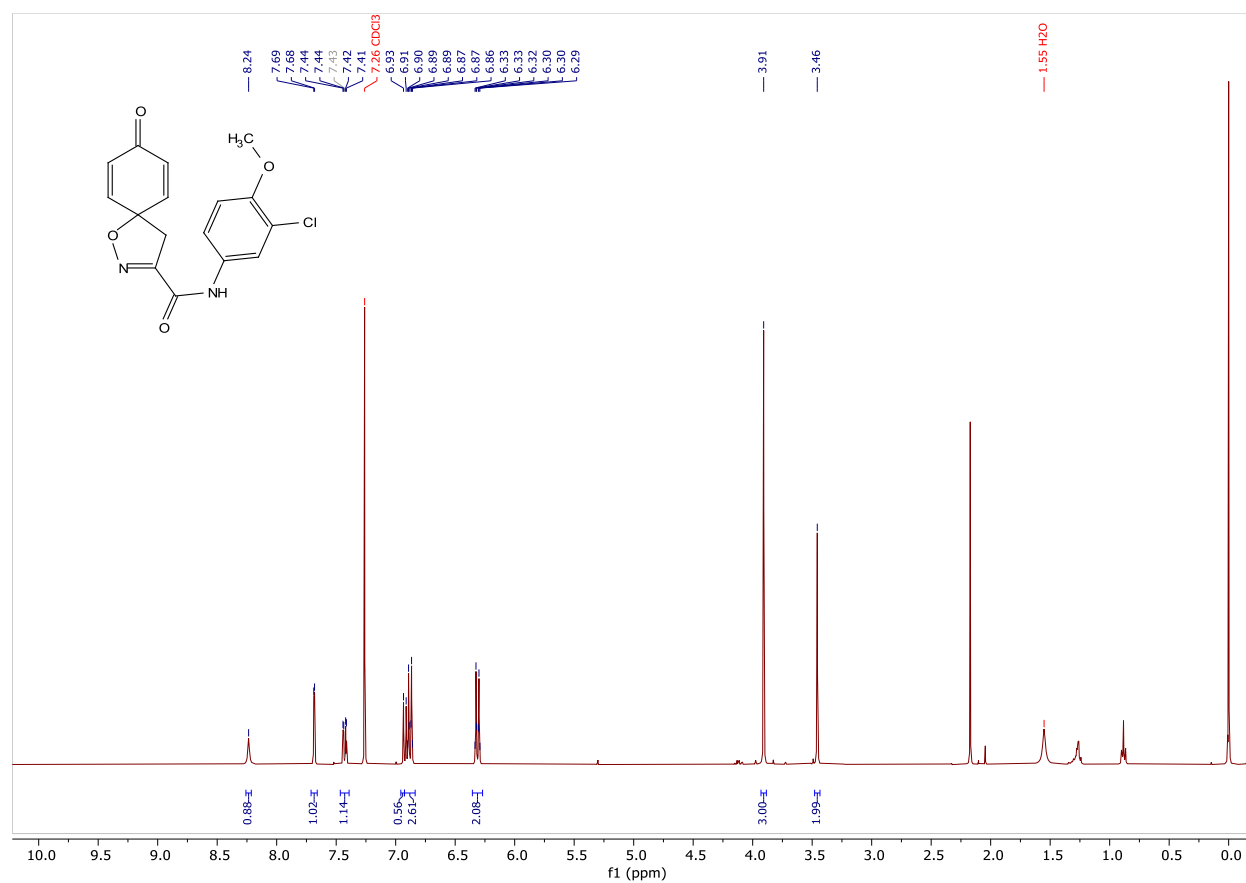

$^{13}\text{C}$  NMR of compound **20** in  $\text{CDCl}_3$  (77.16 ppm)

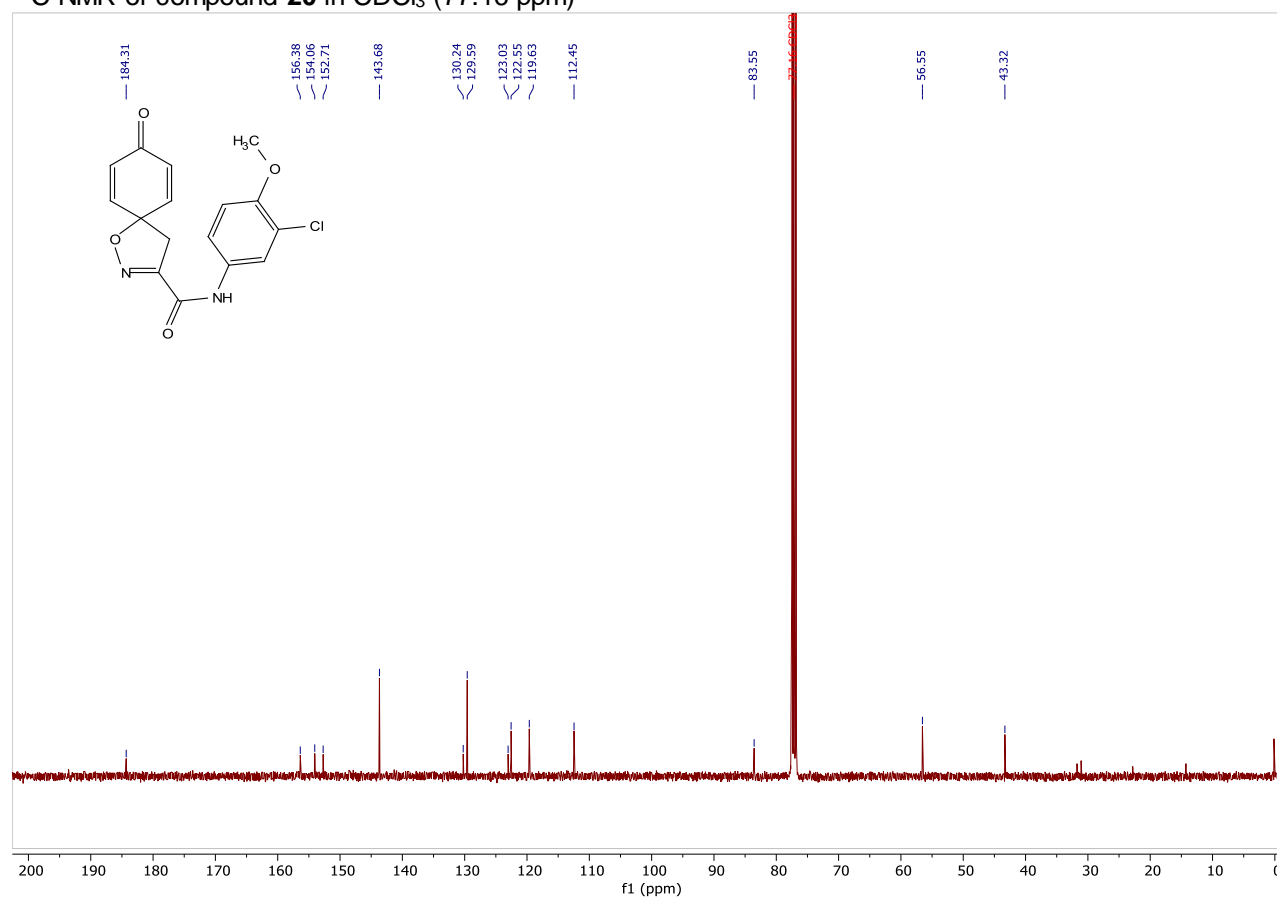

<sup>1</sup>H NMR of compound **21** in d<sub>6</sub>-DMSO (2.50 ppm)

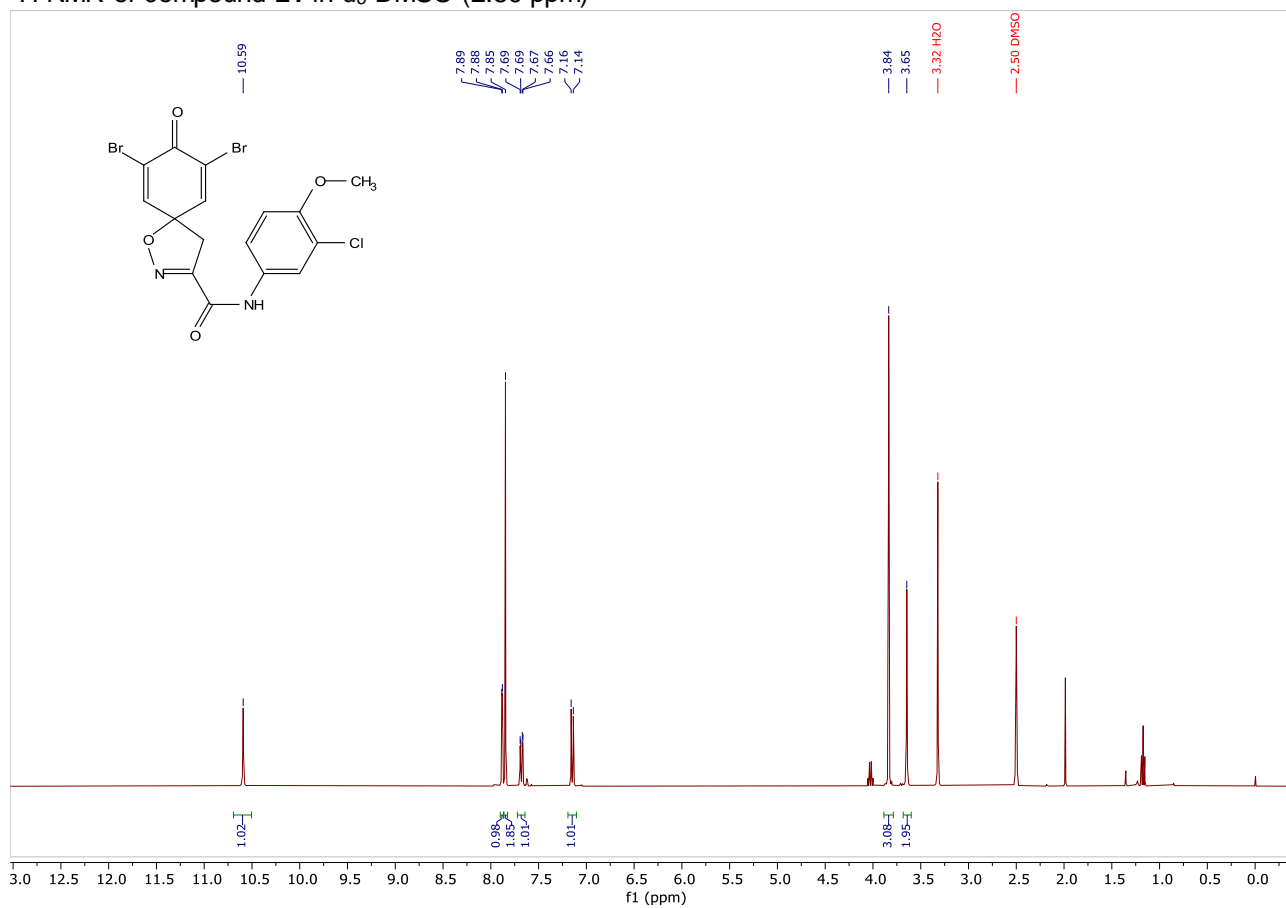

<sup>13</sup>C NMR of compound **21** in d<sub>6</sub>-DMSO (39.52 ppm)

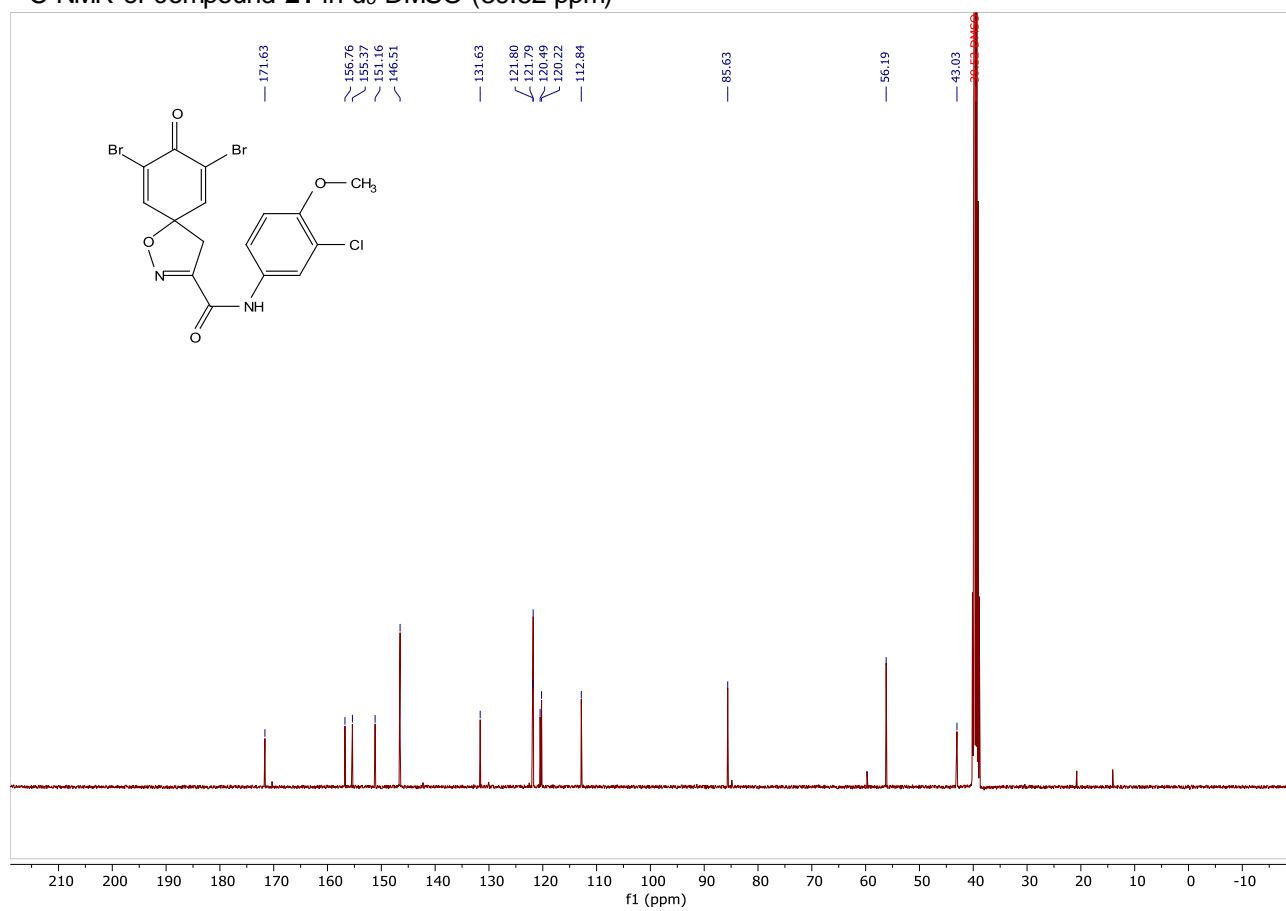

$^1\text{H}$  NMR of compound **22** in  $\text{CDCl}_3$  (7.26 ppm)

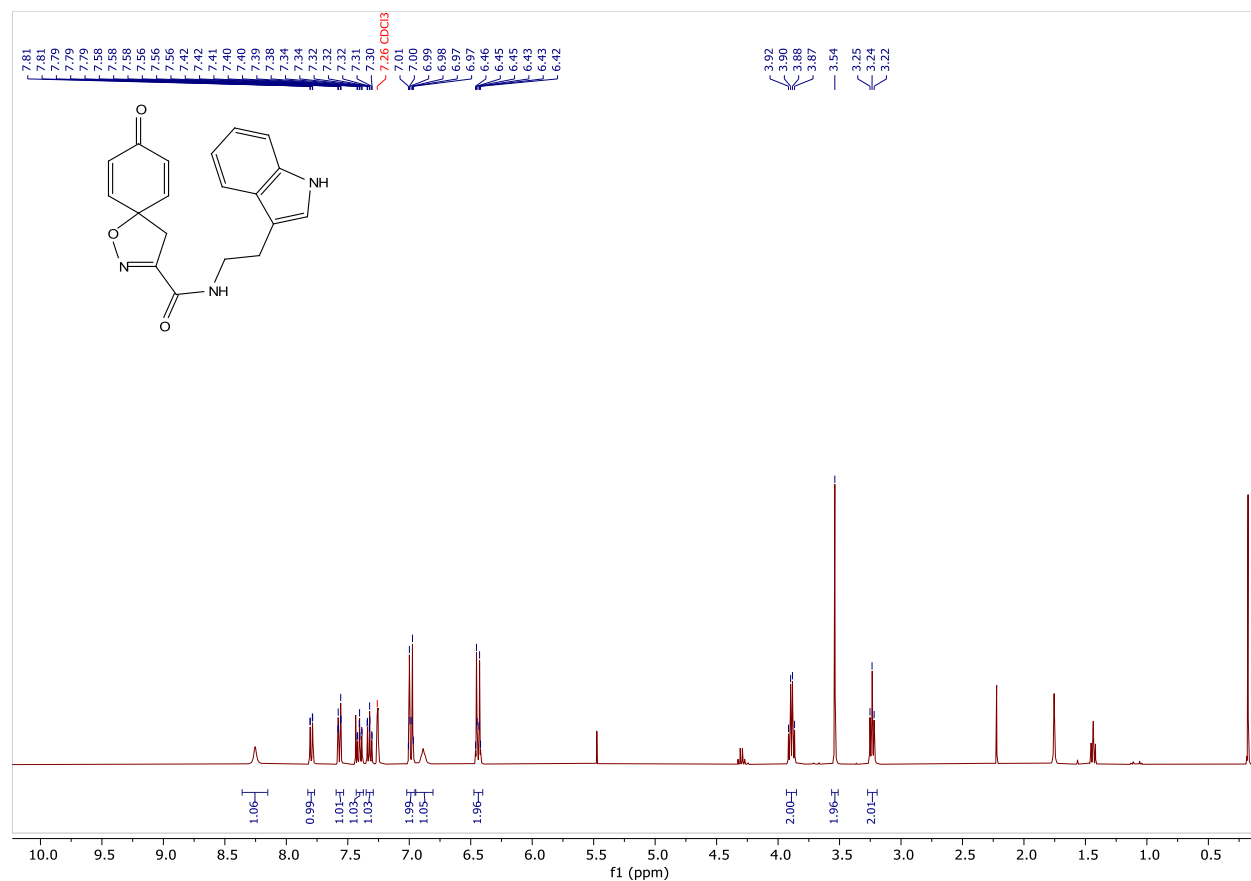

$^{13}\text{C}$  NMR of compound **22** in  $\text{CDCl}_3$  (77.16 ppm)

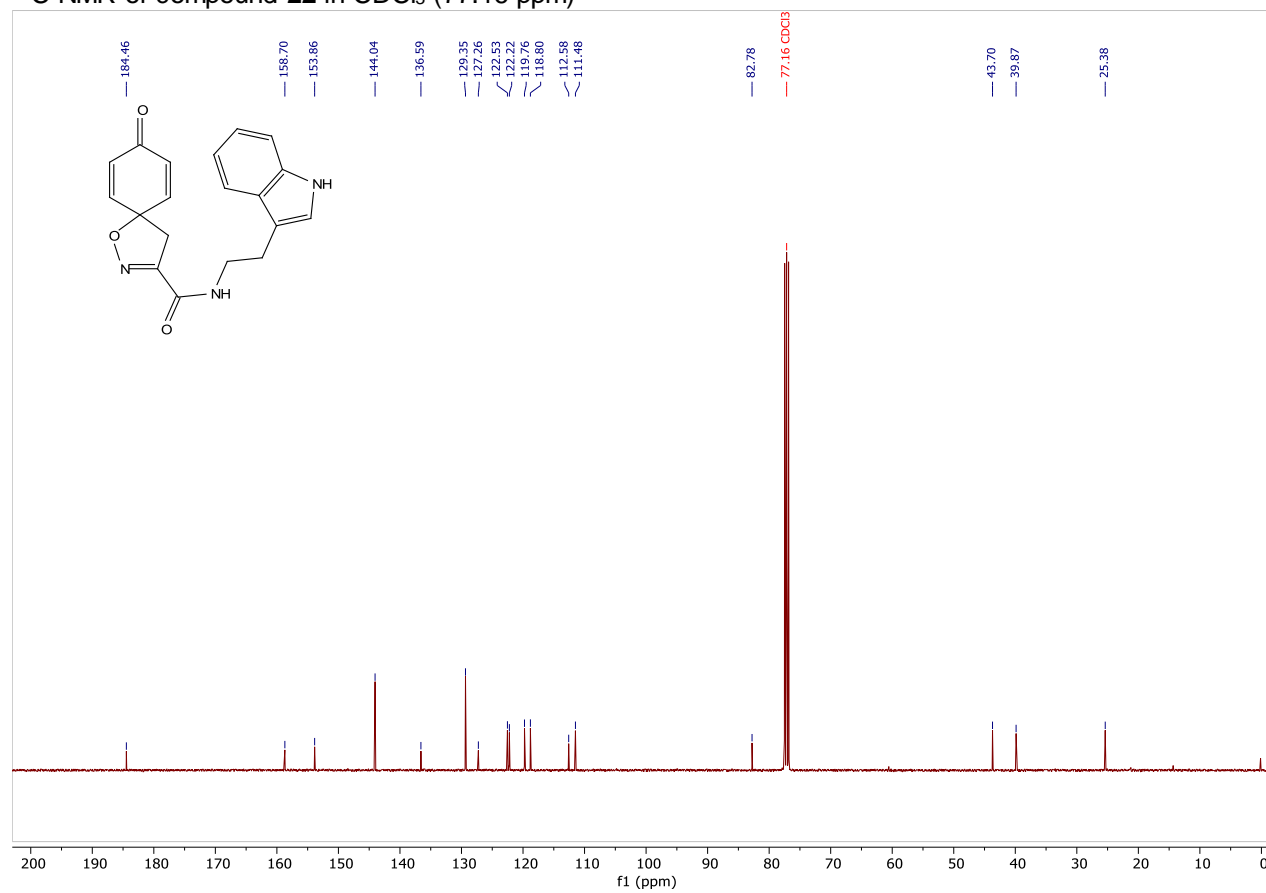

$^1\text{H}$  NMR of compound **23** in  $\text{CDCl}_3$  (7.26 ppm)

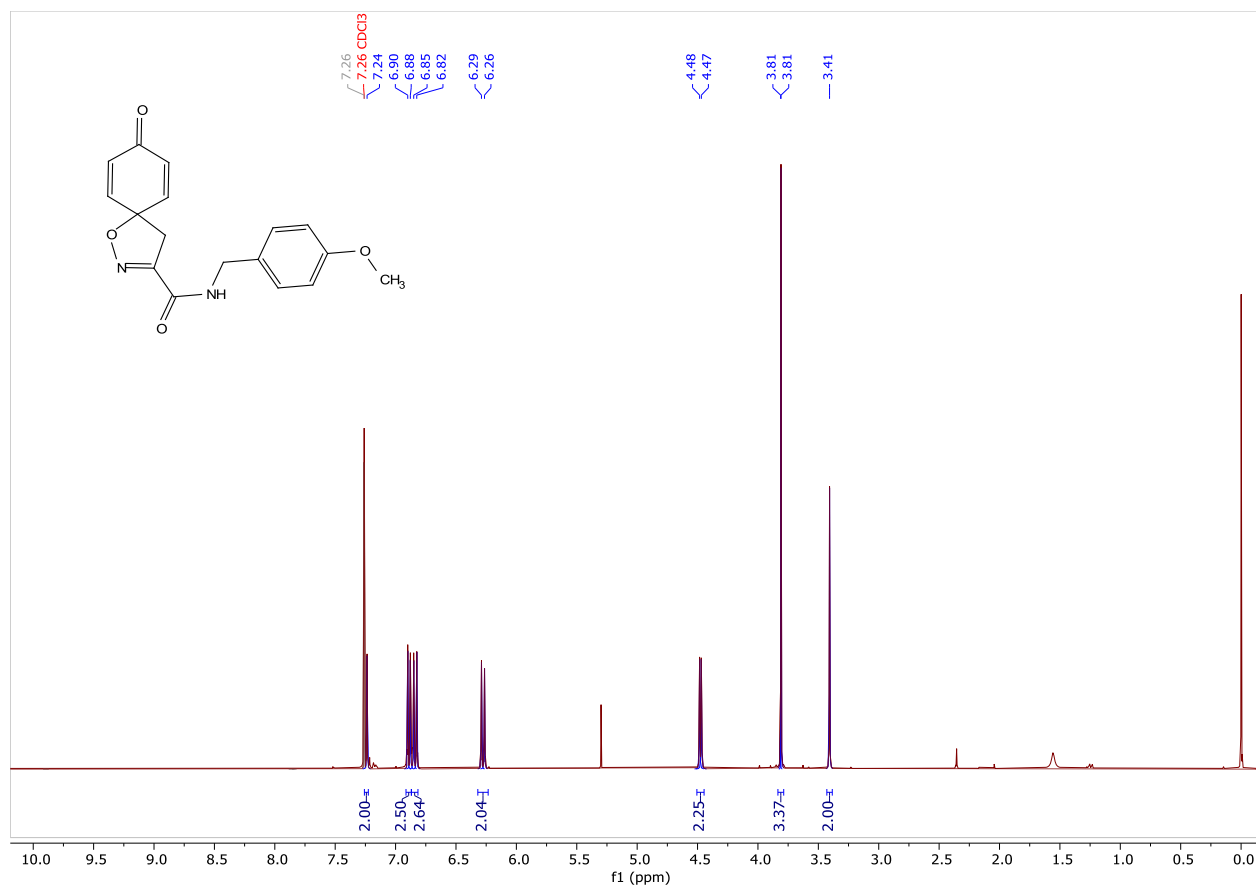

$^{13}\text{C}$  NMR of compound **23** in  $\text{CDCl}_3$  (77.16 ppm)

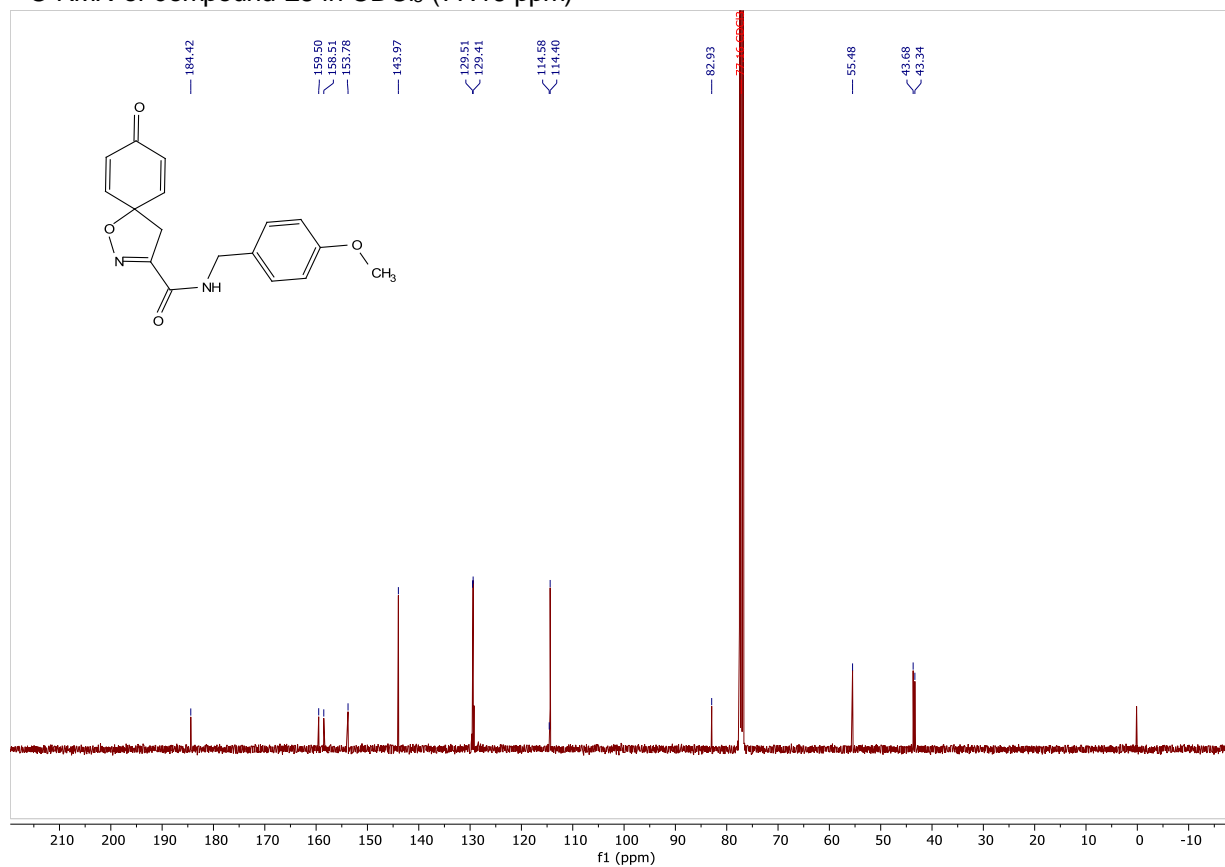

<sup>1</sup>H NMR of compound **24** in d<sub>6</sub>-DMSO (2.50 ppm)

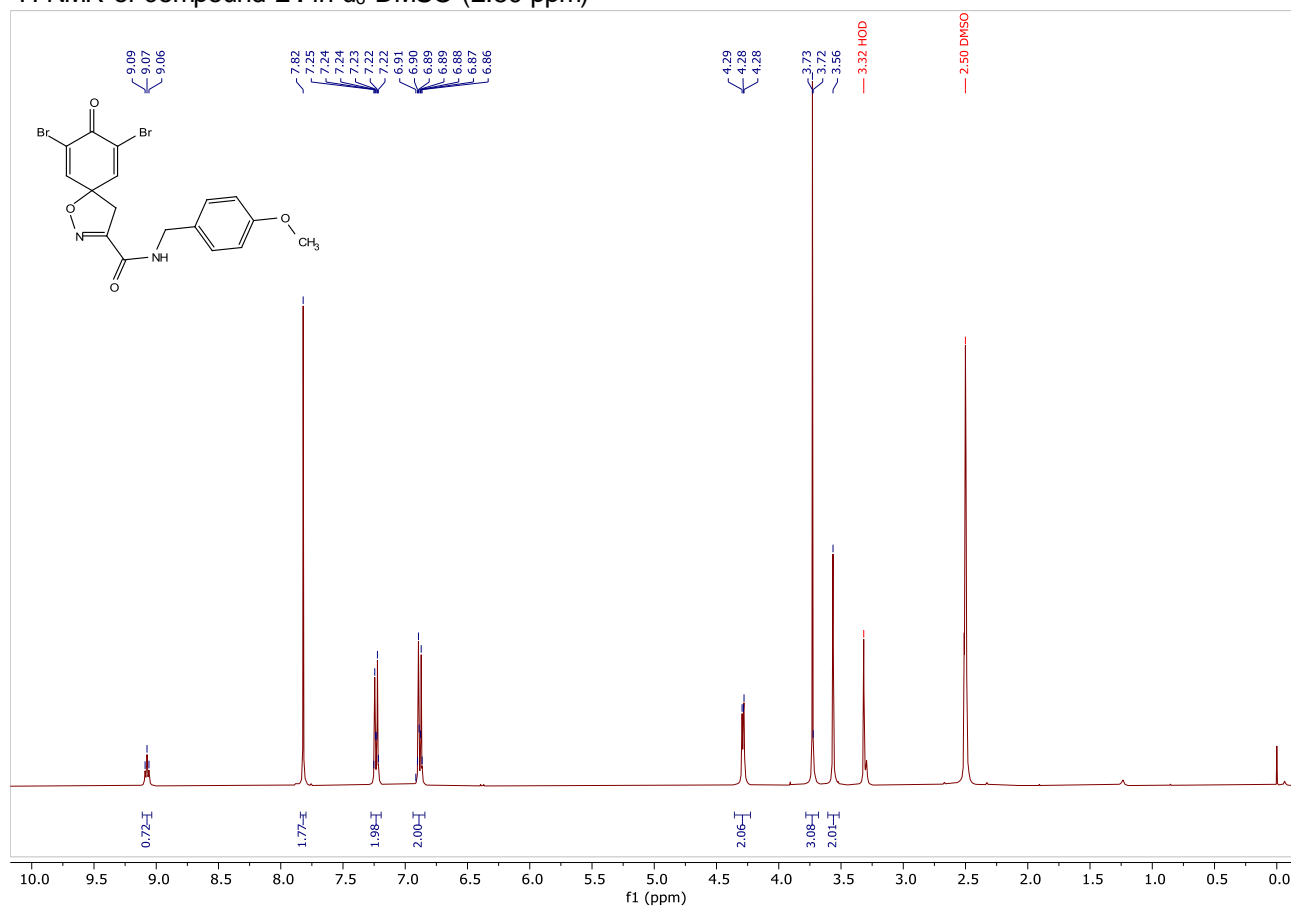

<sup>13</sup>C NMR of compound **24** in d<sub>6</sub>-DMSO (39.52 ppm)

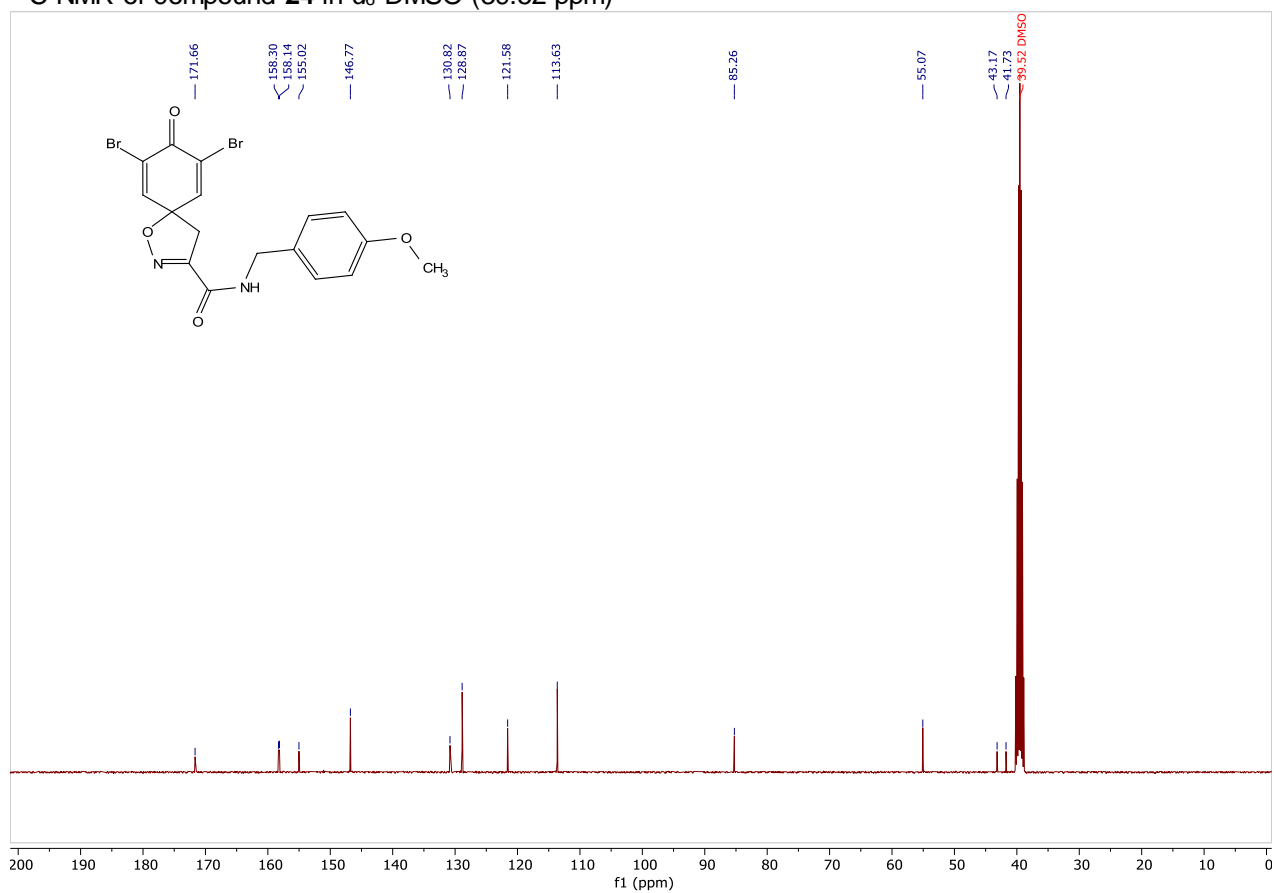



$^1\text{H}$  NMR of compound **25** in  $\text{CDCl}_3$  (7.26 ppm)

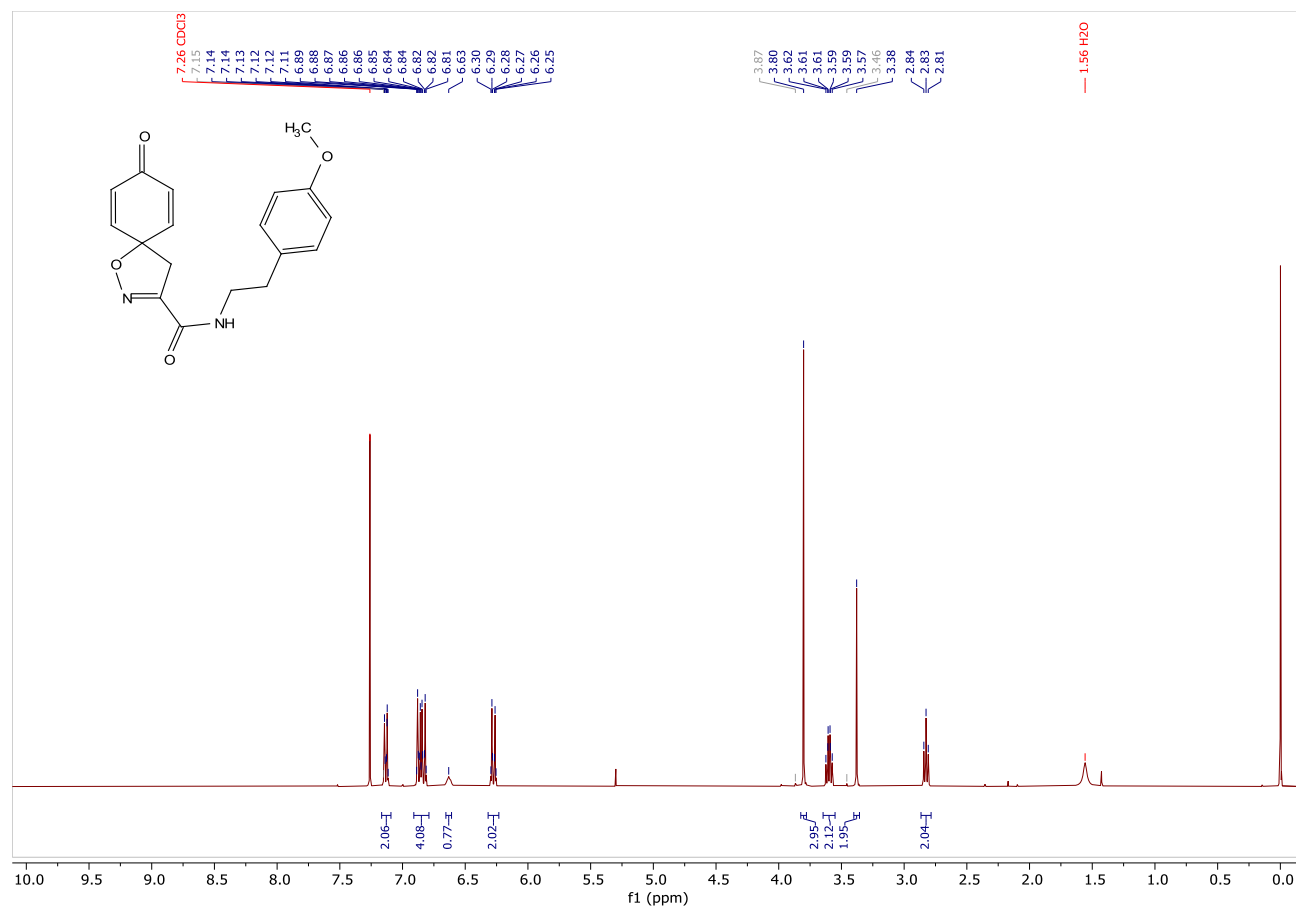

$^{13}\text{C}$  NMR of compound **25** in  $\text{CDCl}_3$  (77.16 ppm)

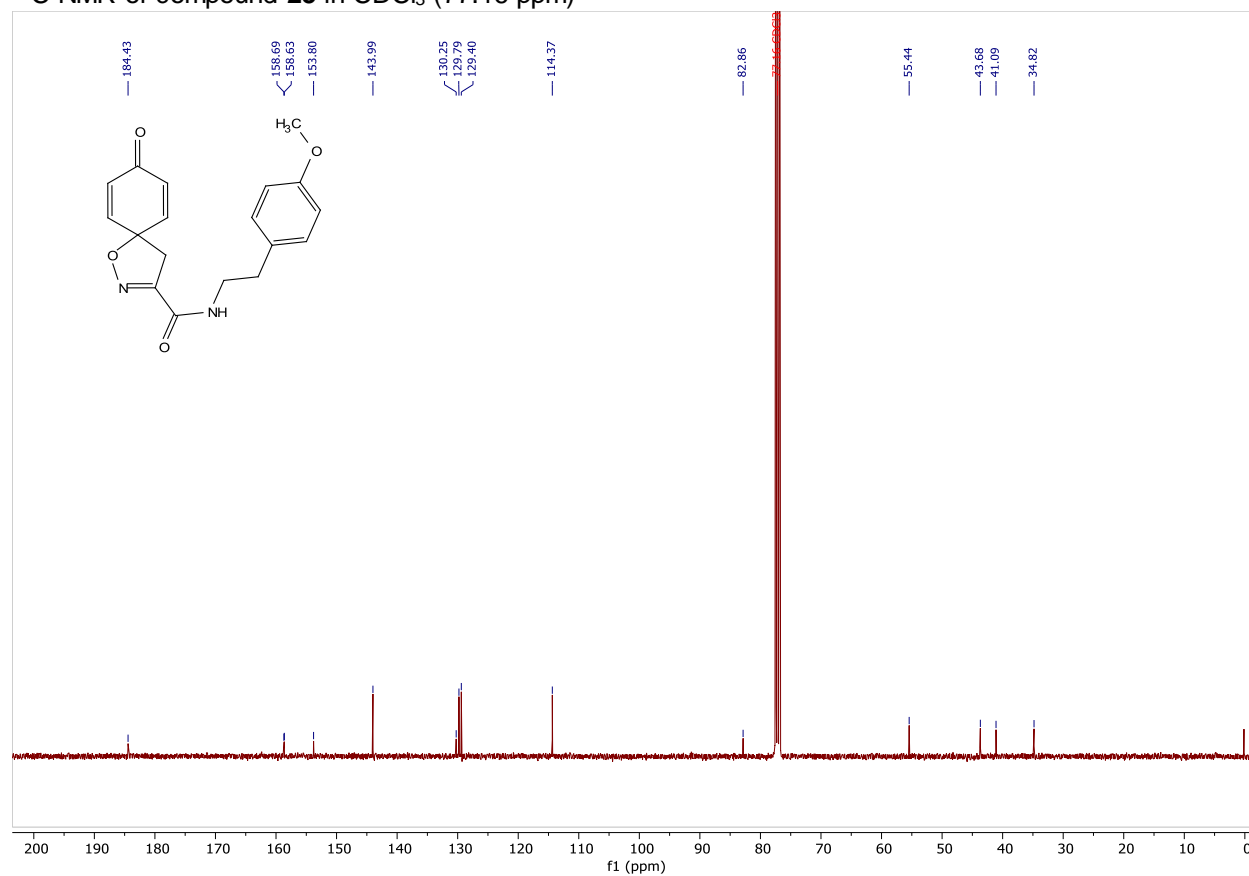

$^1\text{H}$  NMR of compound **26** in  $\text{CDCl}_3$  (7.26 ppm)

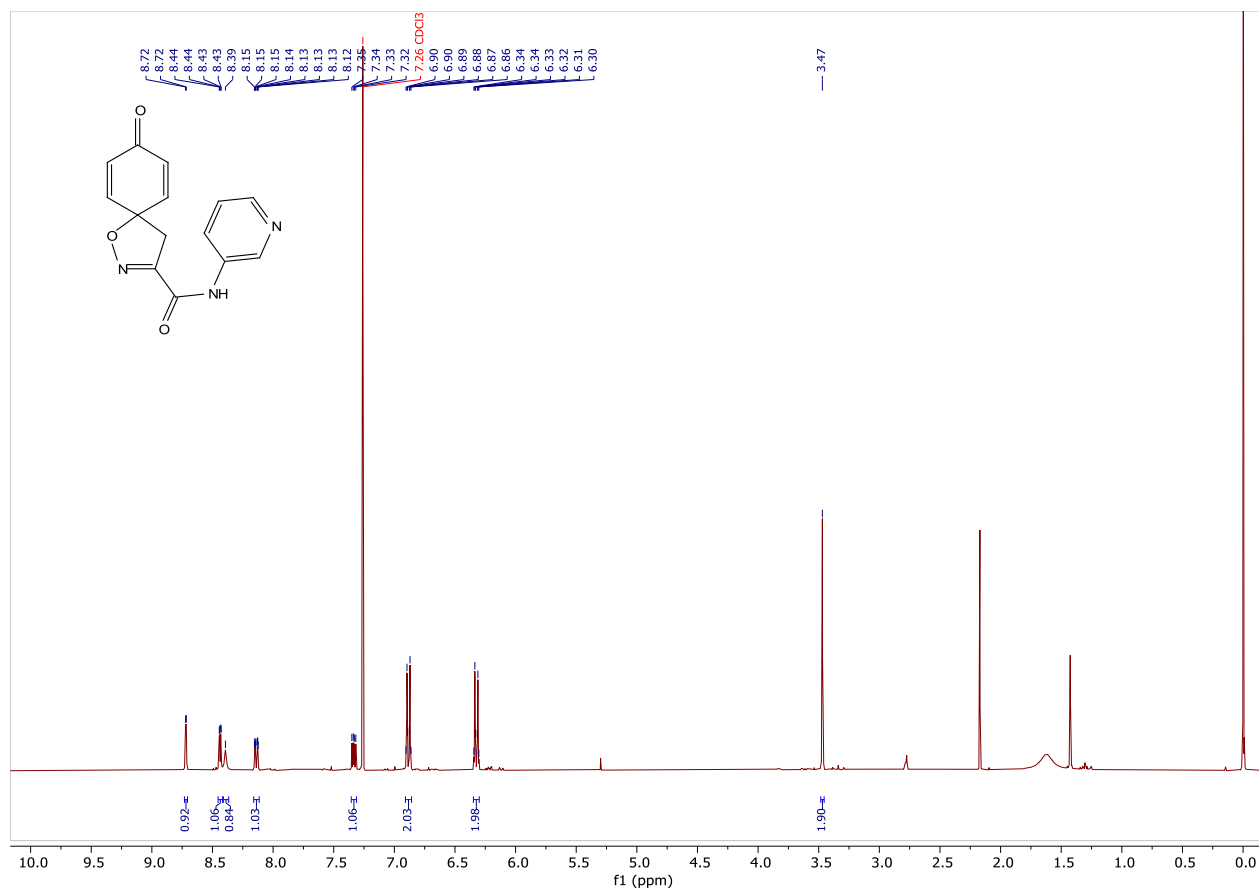

$^{13}\text{C}$  NMR of compound **26** in  $\text{CDCl}_3$  (77.16 ppm)

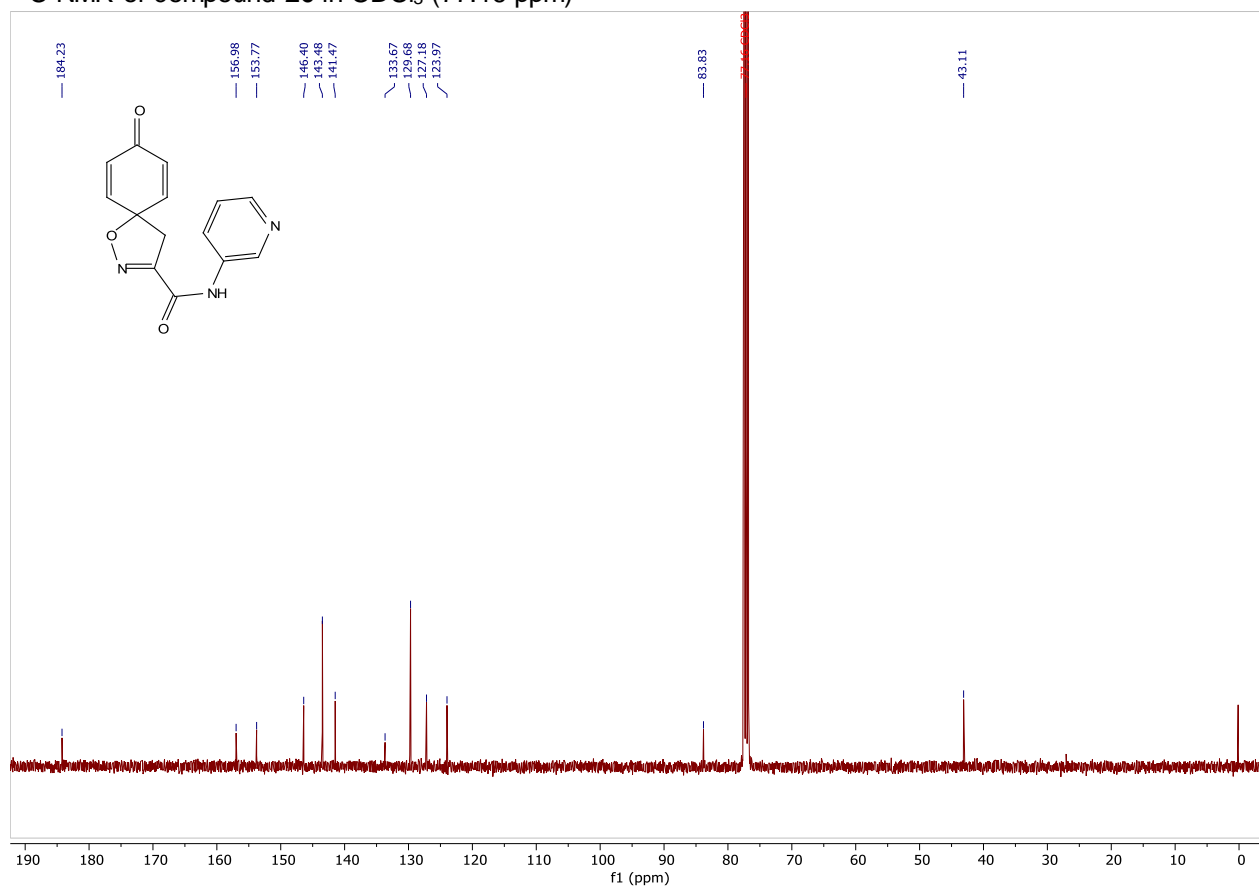

<sup>1</sup>H NMR of compound **27** in d<sub>6</sub>-DMSO (2.50 ppm)

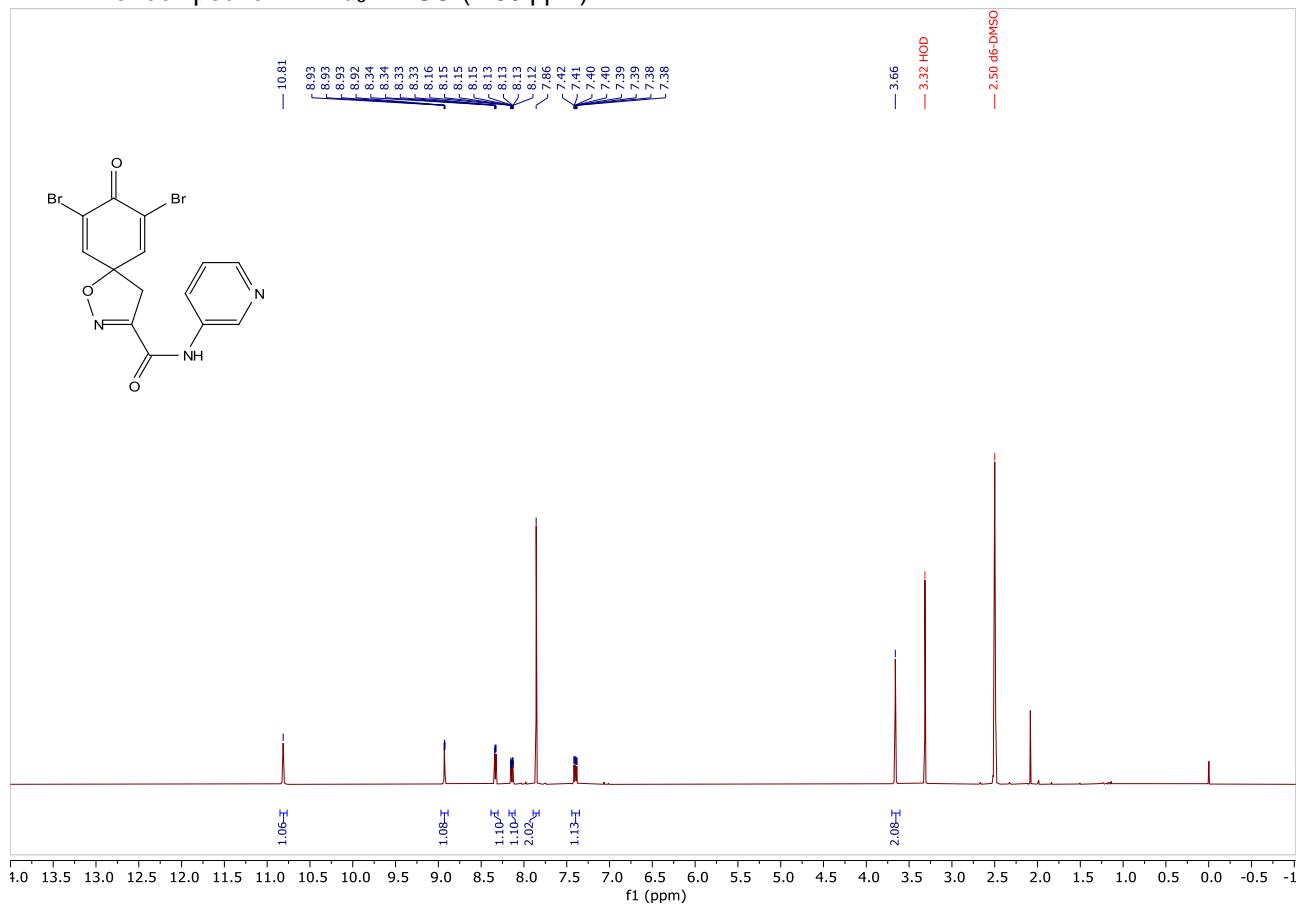

<sup>13</sup>C NMR of compound **27** in d<sub>6</sub>-DMSO (39.52 ppm)

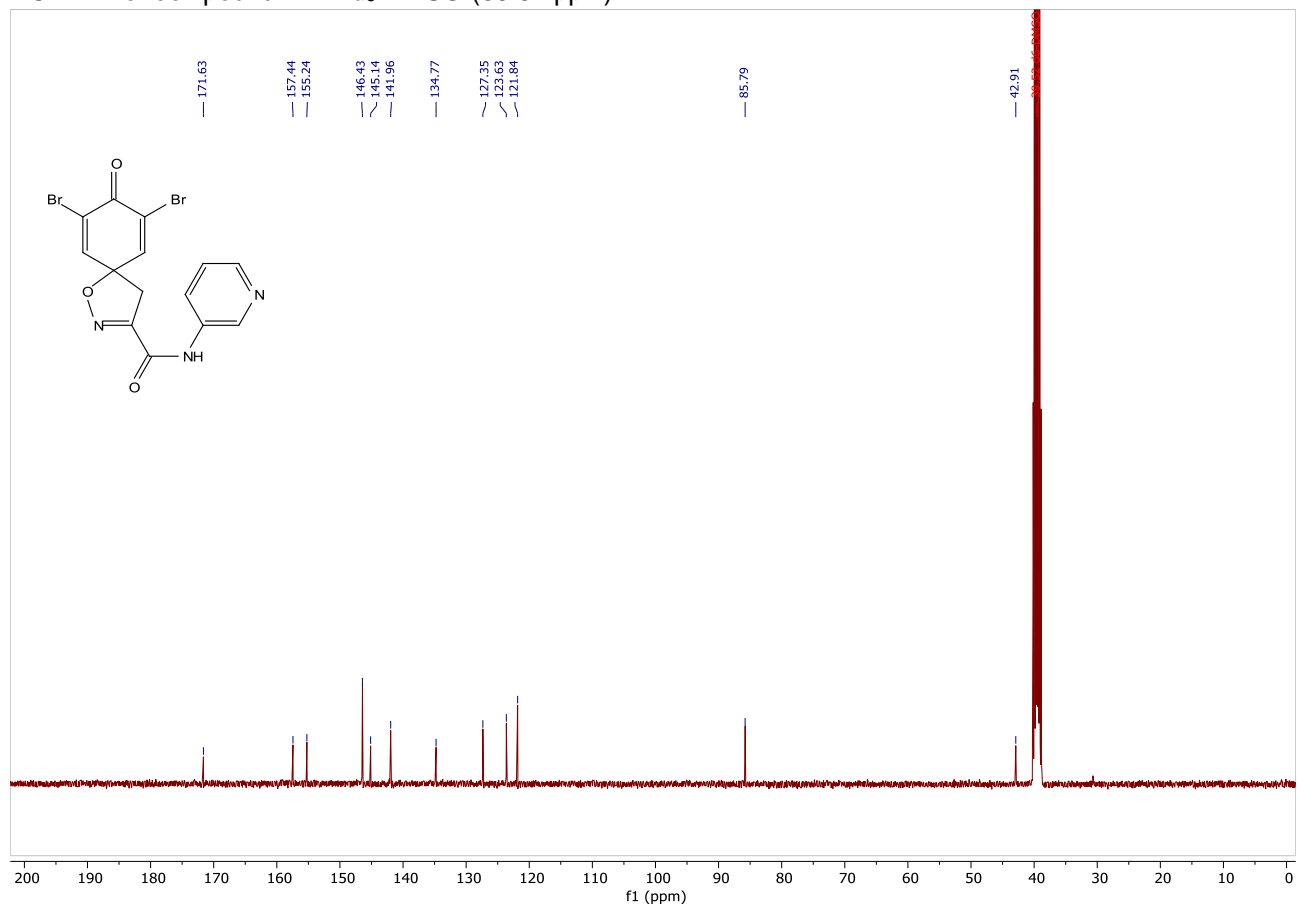

$^1\text{H}$  NMR of compound **28** in  $\text{CDCl}_3$  (7.26 ppm)

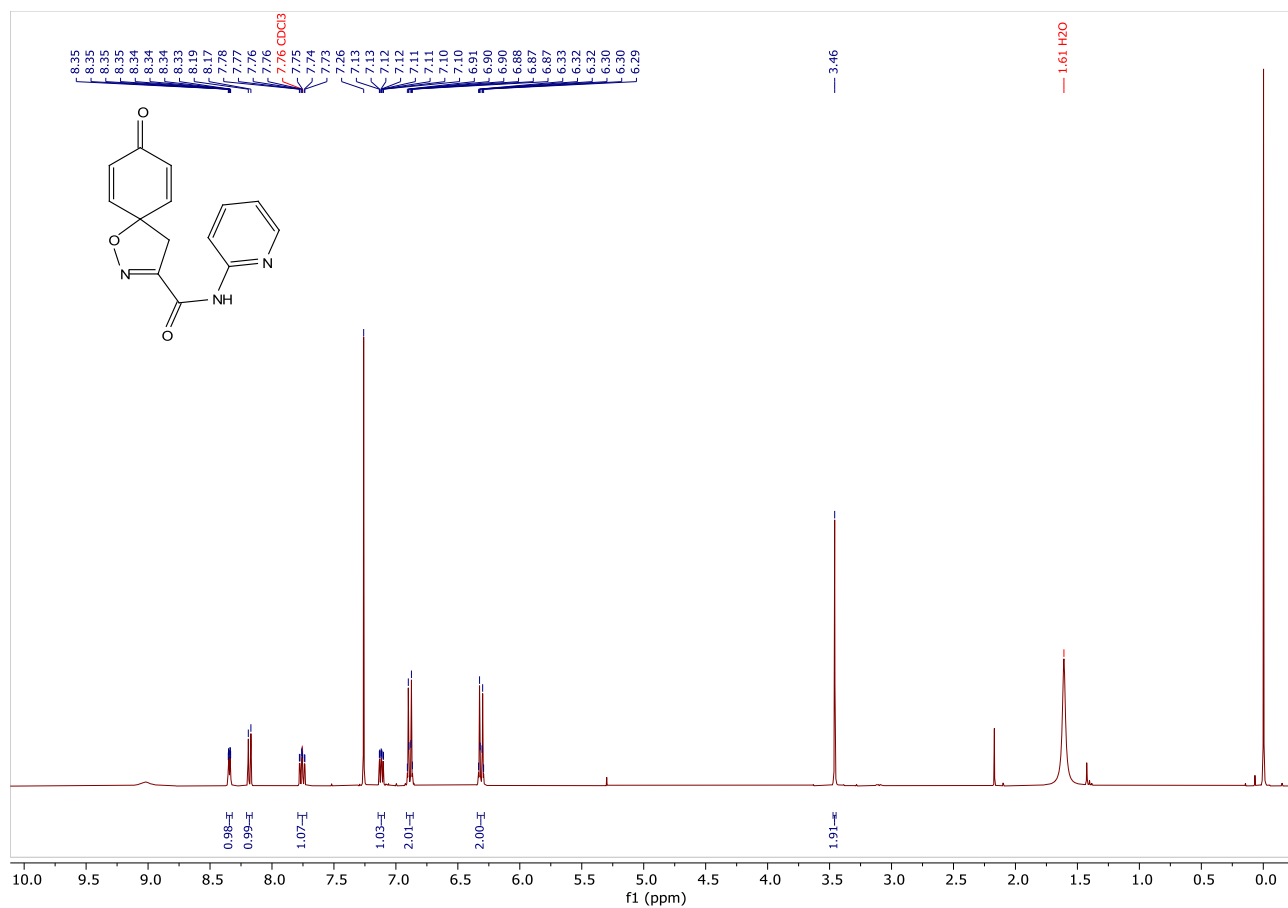

$^{13}\text{C}$  NMR of compound **28** in  $\text{CDCl}_3$  (77.16 ppm)

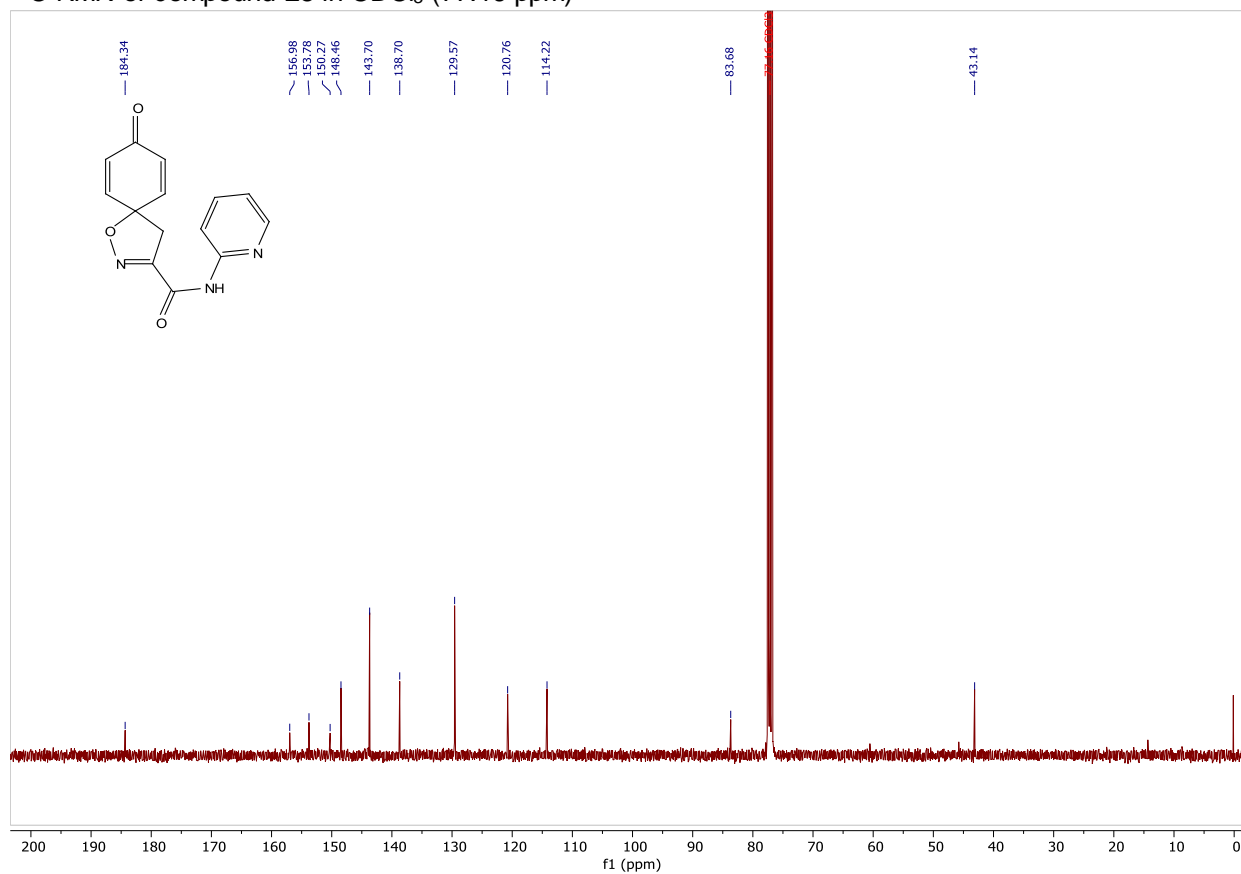

<sup>1</sup>H NMR of compound **29** in d<sub>6</sub>-acetone (2.05 ppm)

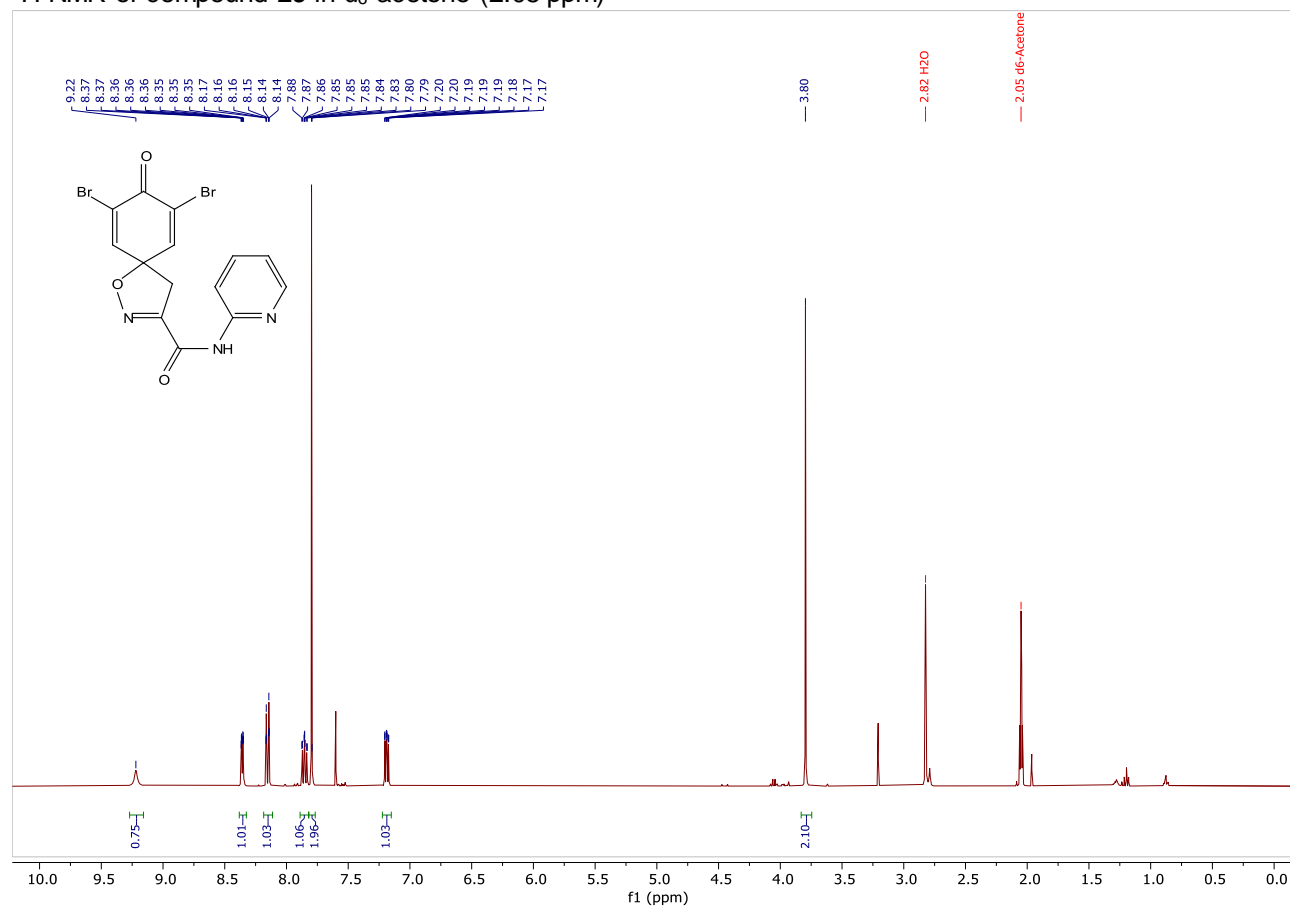

<sup>13</sup>C NMR of compound **29** in d<sub>6</sub>-acetone (29.84 ppm)

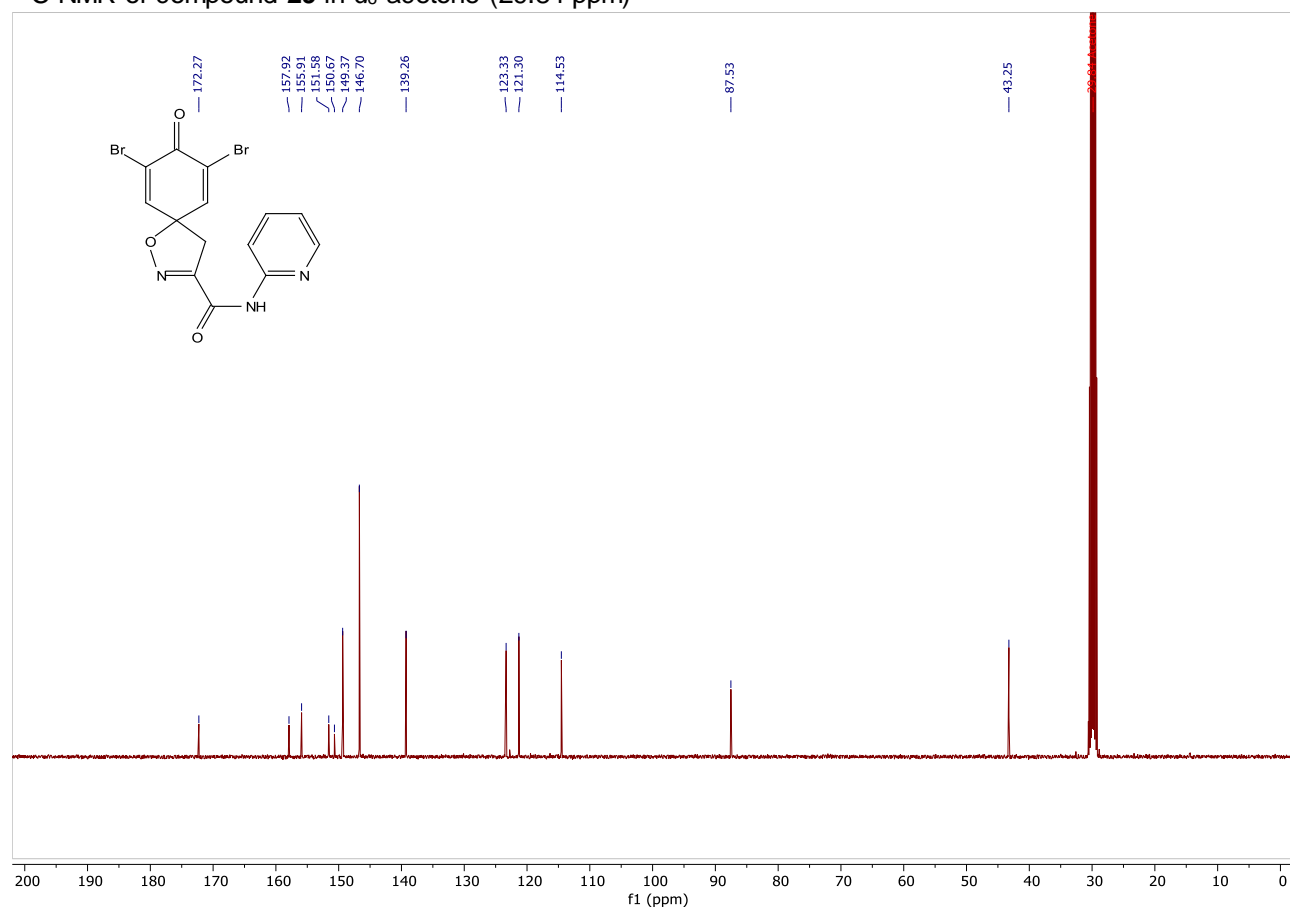

$^1\text{H}$  NMR of compound **30** in  $\text{CDCl}_3$  (7.26 ppm)

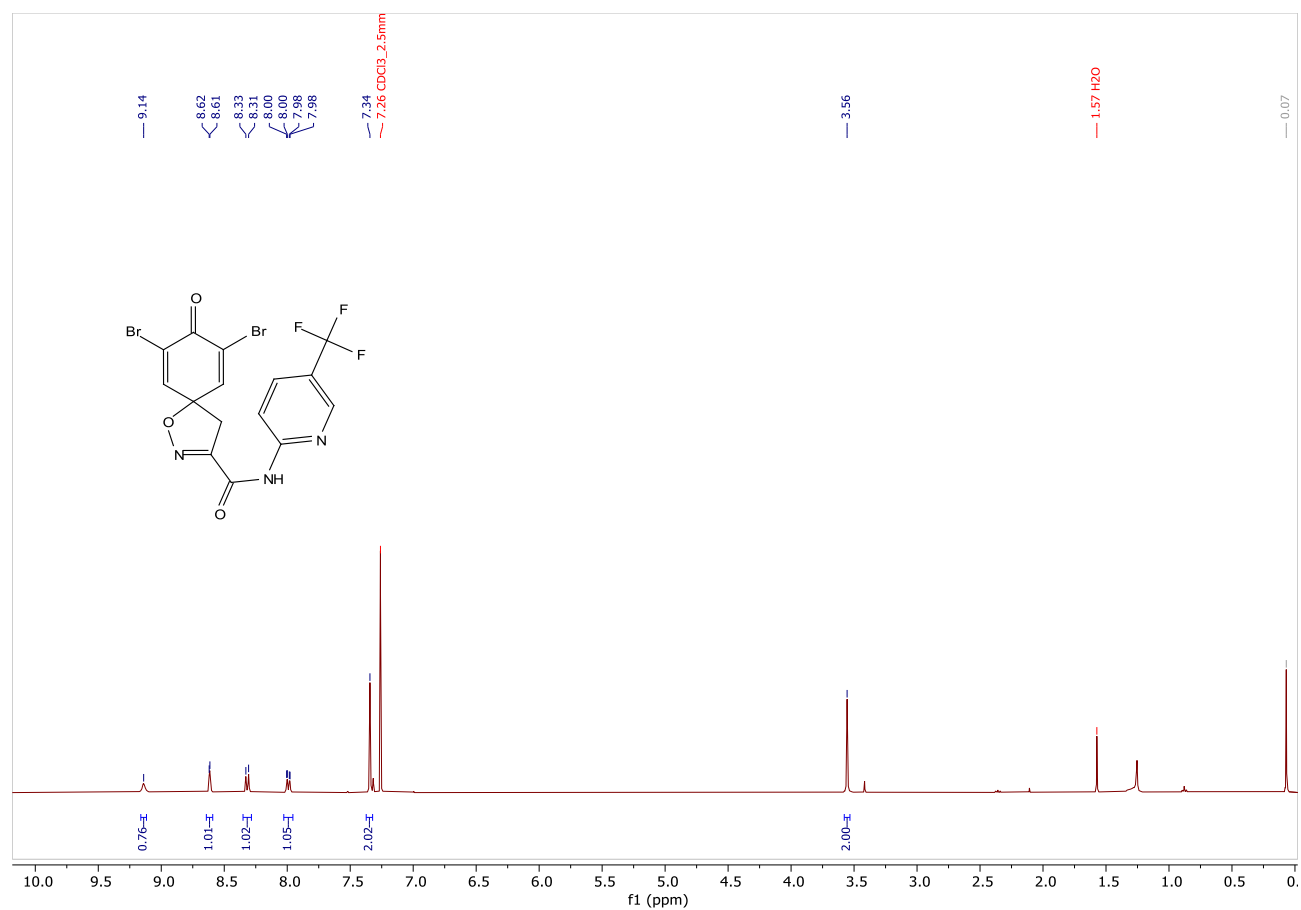

$^{13}\text{C}$  NMR of compound **30** in  $\text{CDCl}_3$  (77.16 ppm)

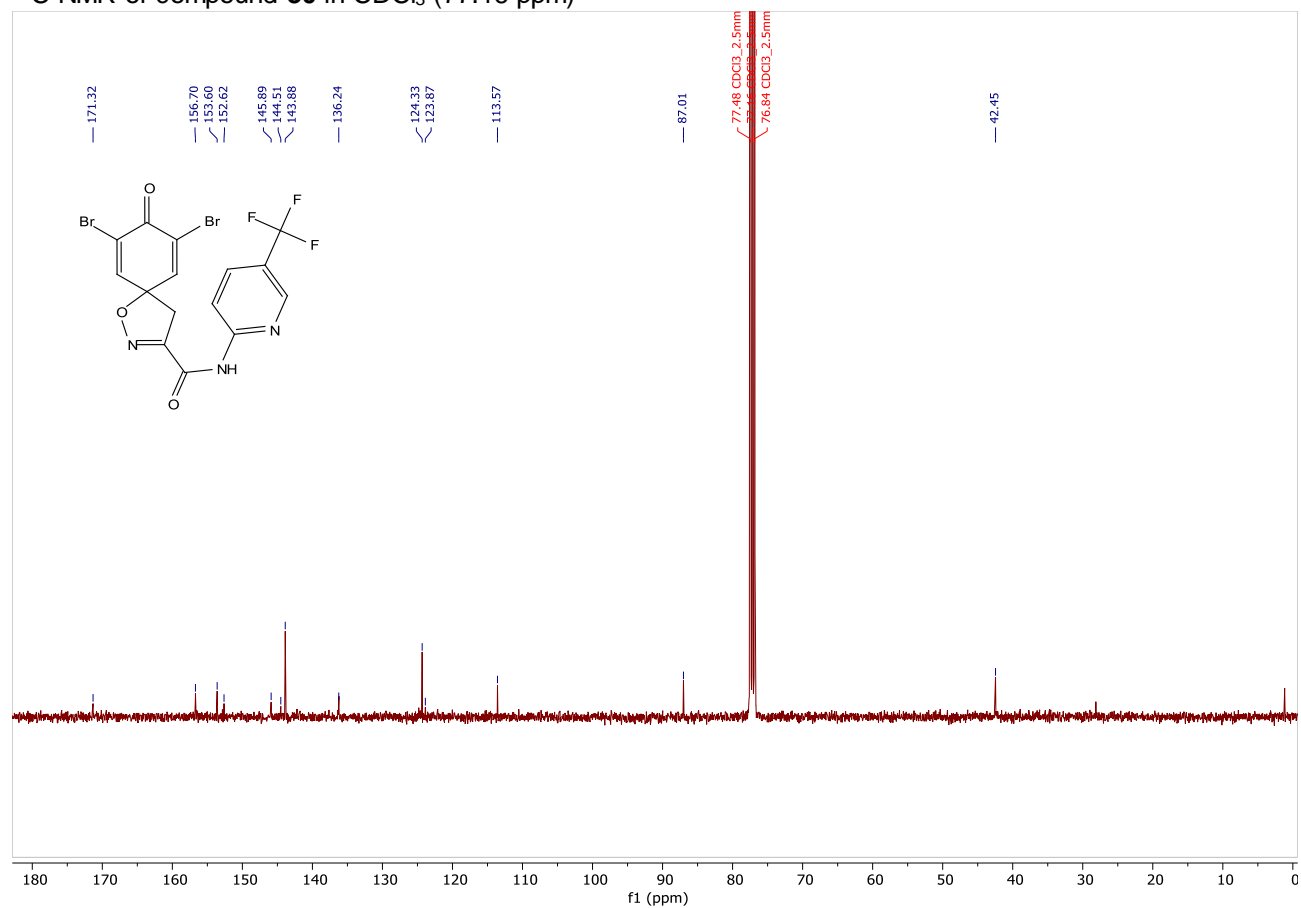

$^1\text{H}$  NMR of compound **31** in  $d_6$ -acetone (2.05 ppm)

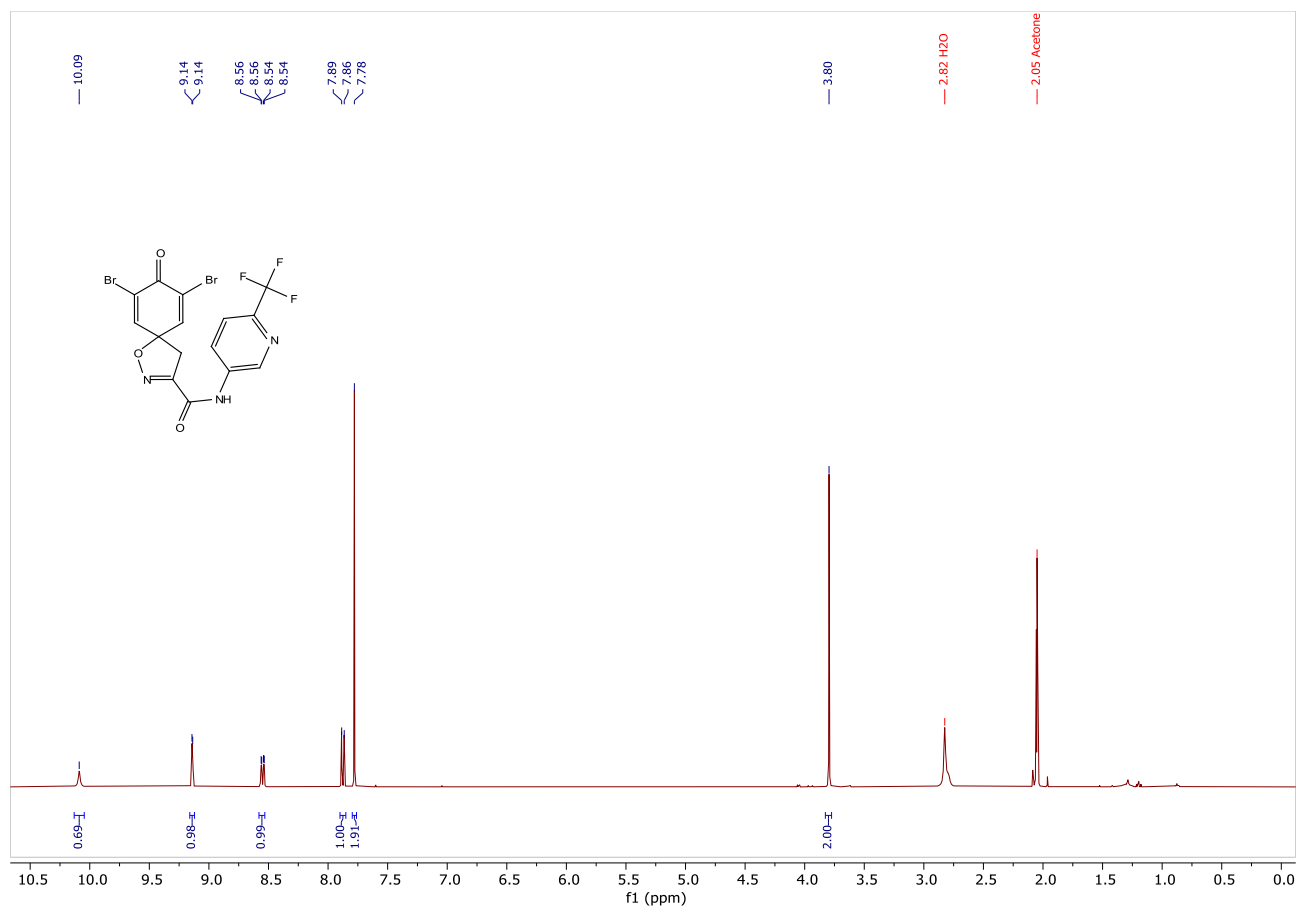

$^{13}\text{C}$  NMR of compound **31** in  $d_6$ -acetone (29.84 ppm)

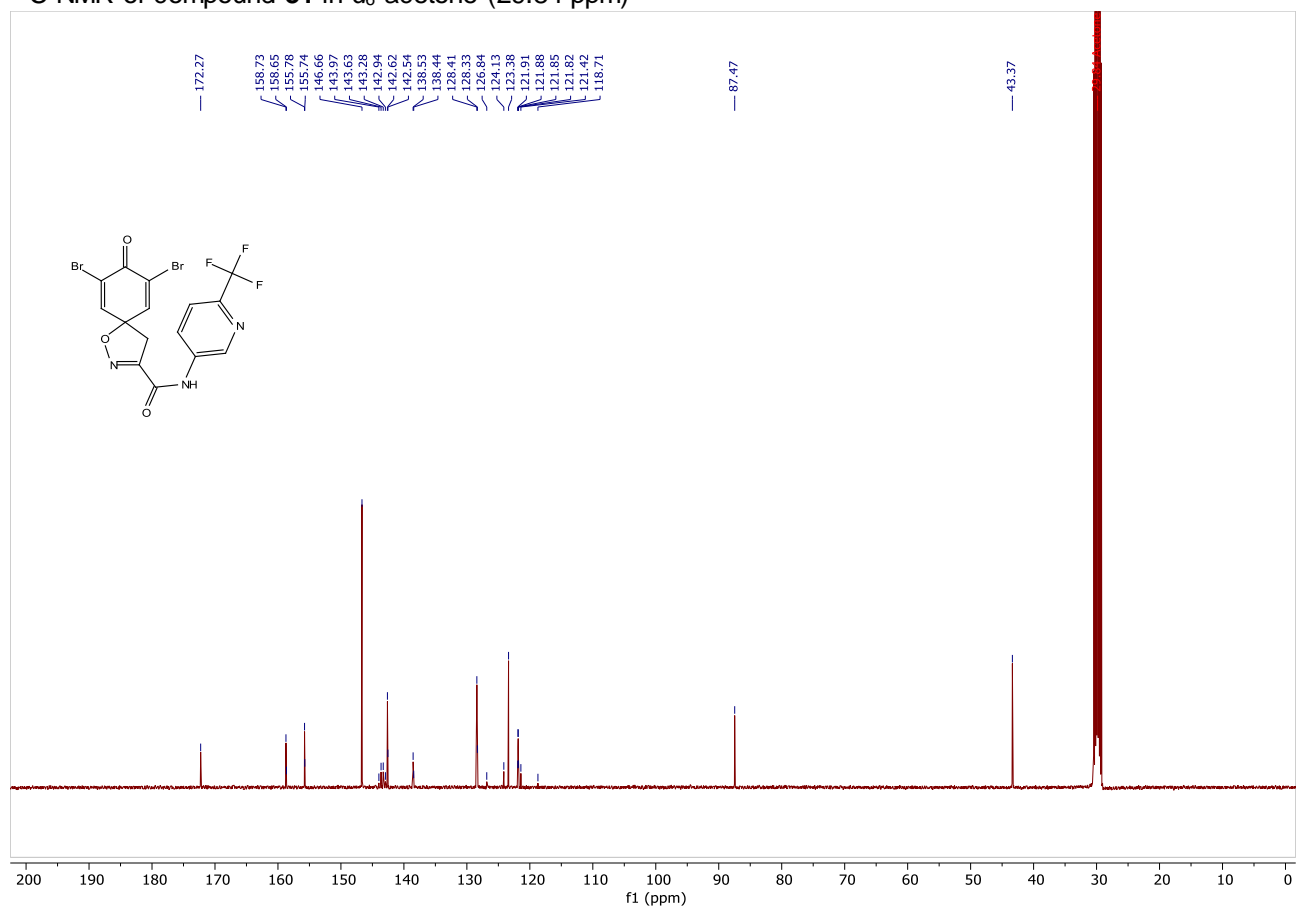

$^1\text{H}$  NMR of compound **32** in  $\text{CDCl}_3$  (7.26 ppm)

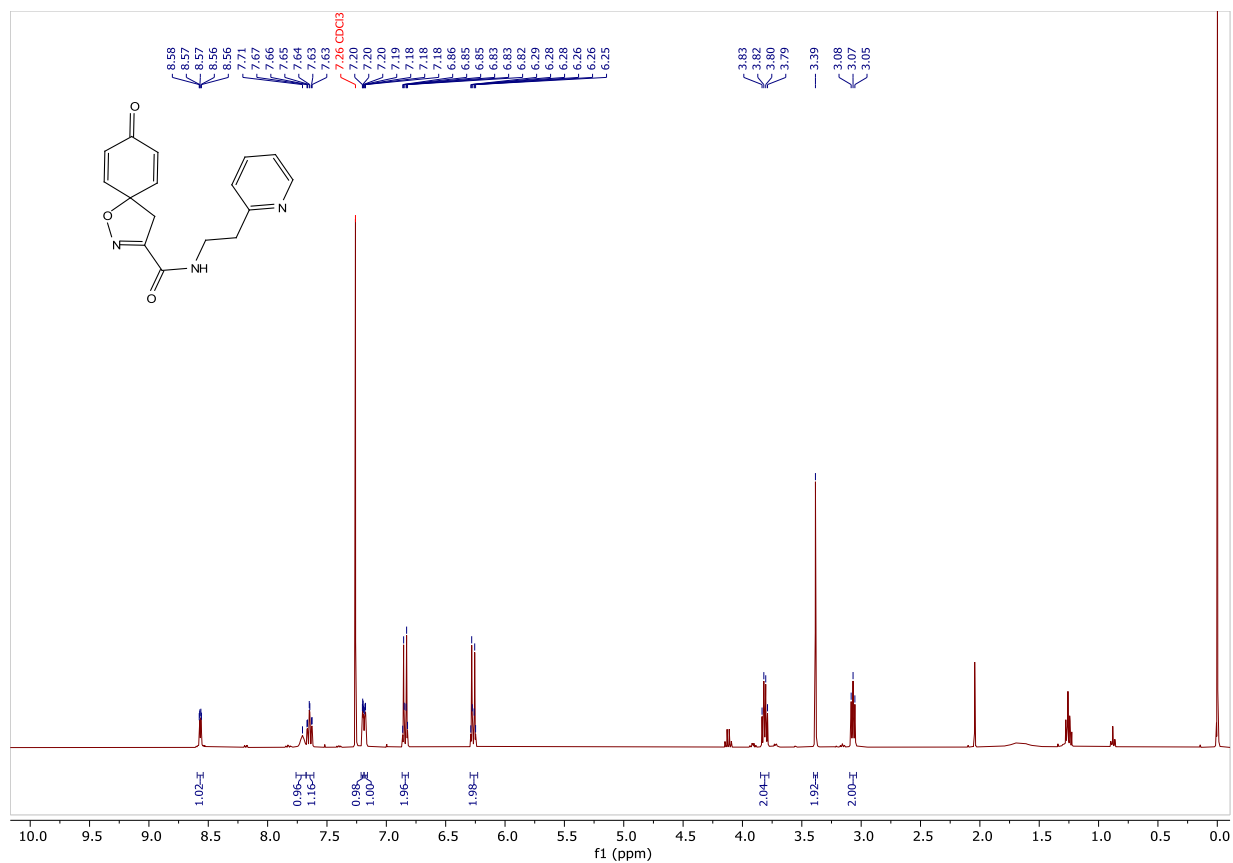

$^{13}\text{C}$  NMR of compound **32** in  $\text{CDCl}_3$  (77.16 ppm)

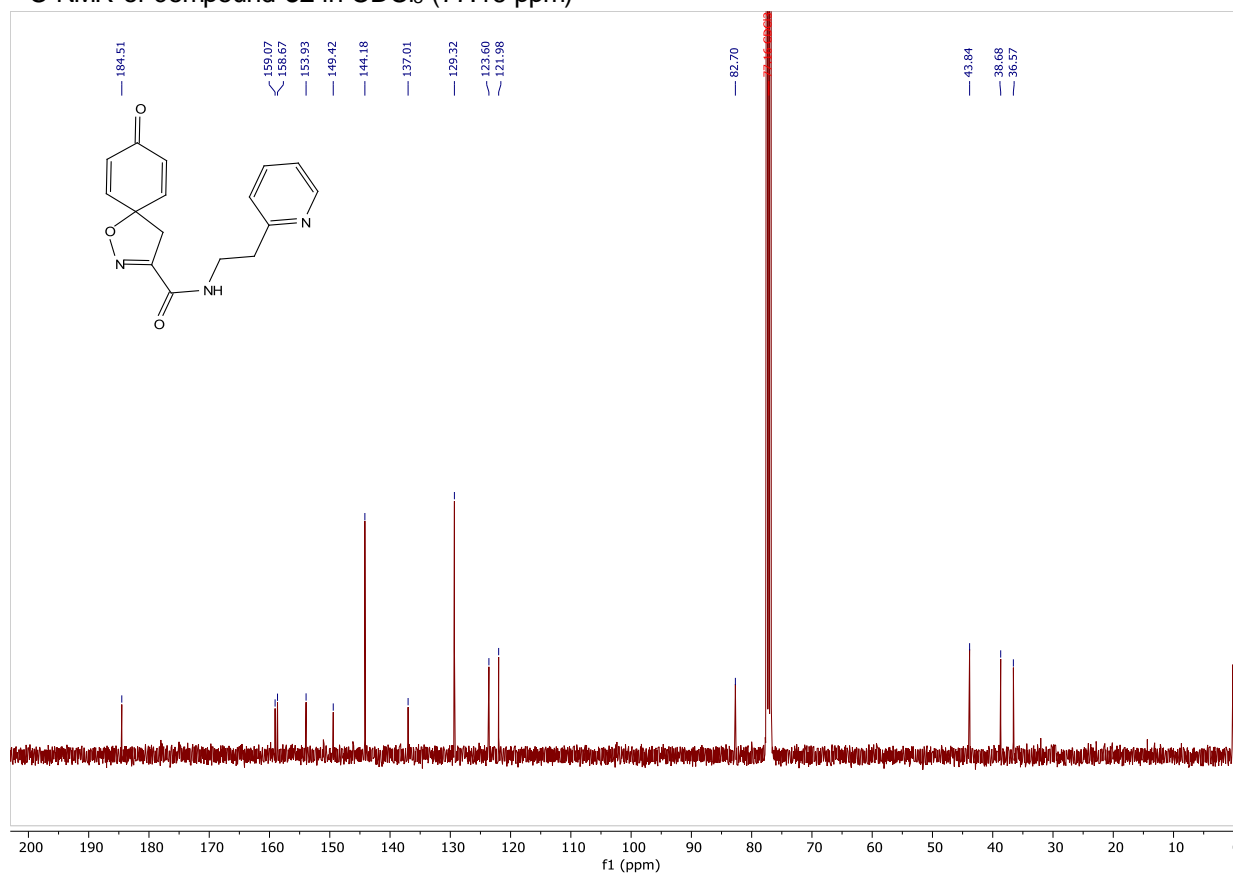





$^1\text{H}$  NMR of compound **34** in  $d_6$ -DMSO (2.50 ppm)

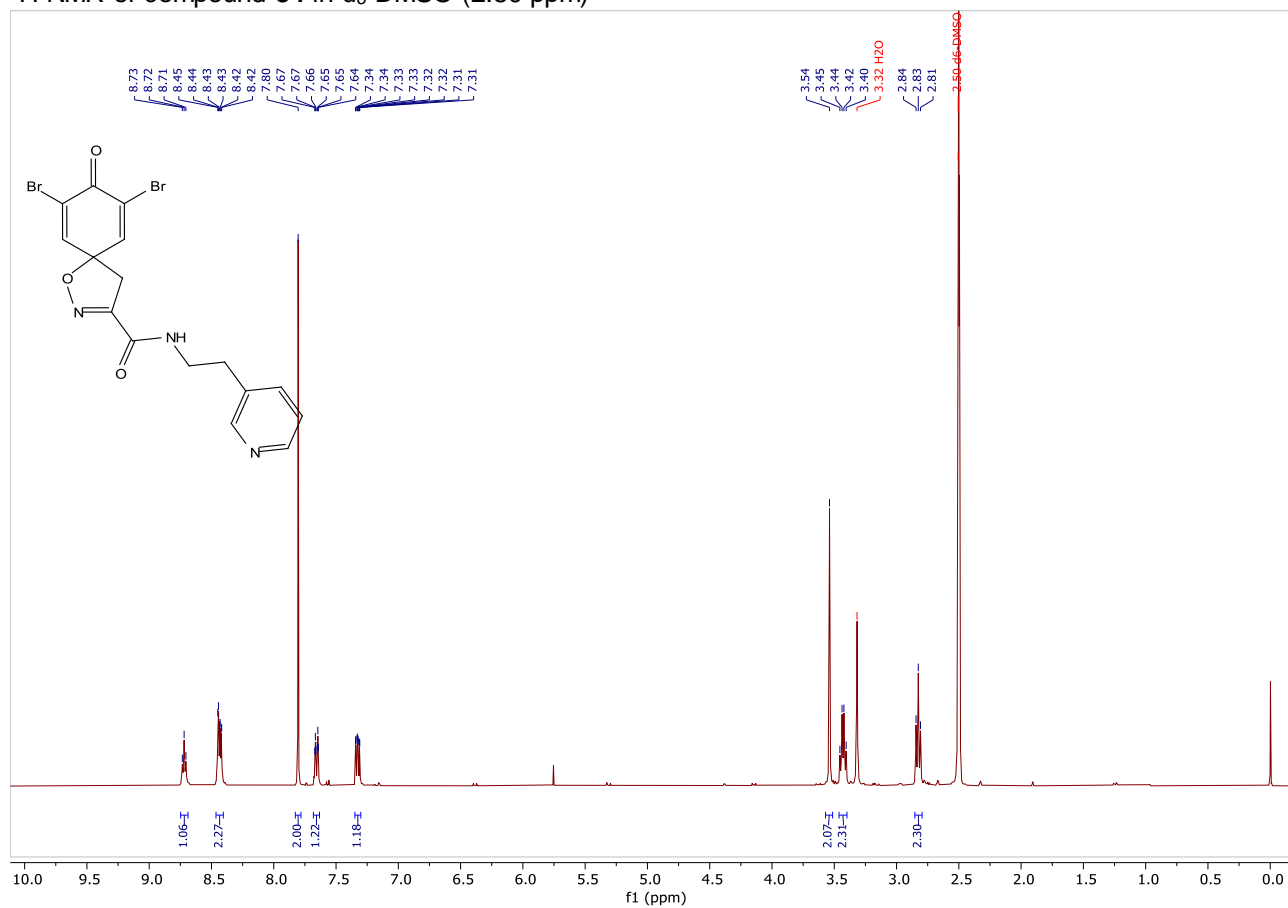

$^{13}\text{C}$  NMR of compound **34** in  $d_6$ -DMSO (39.52 ppm)

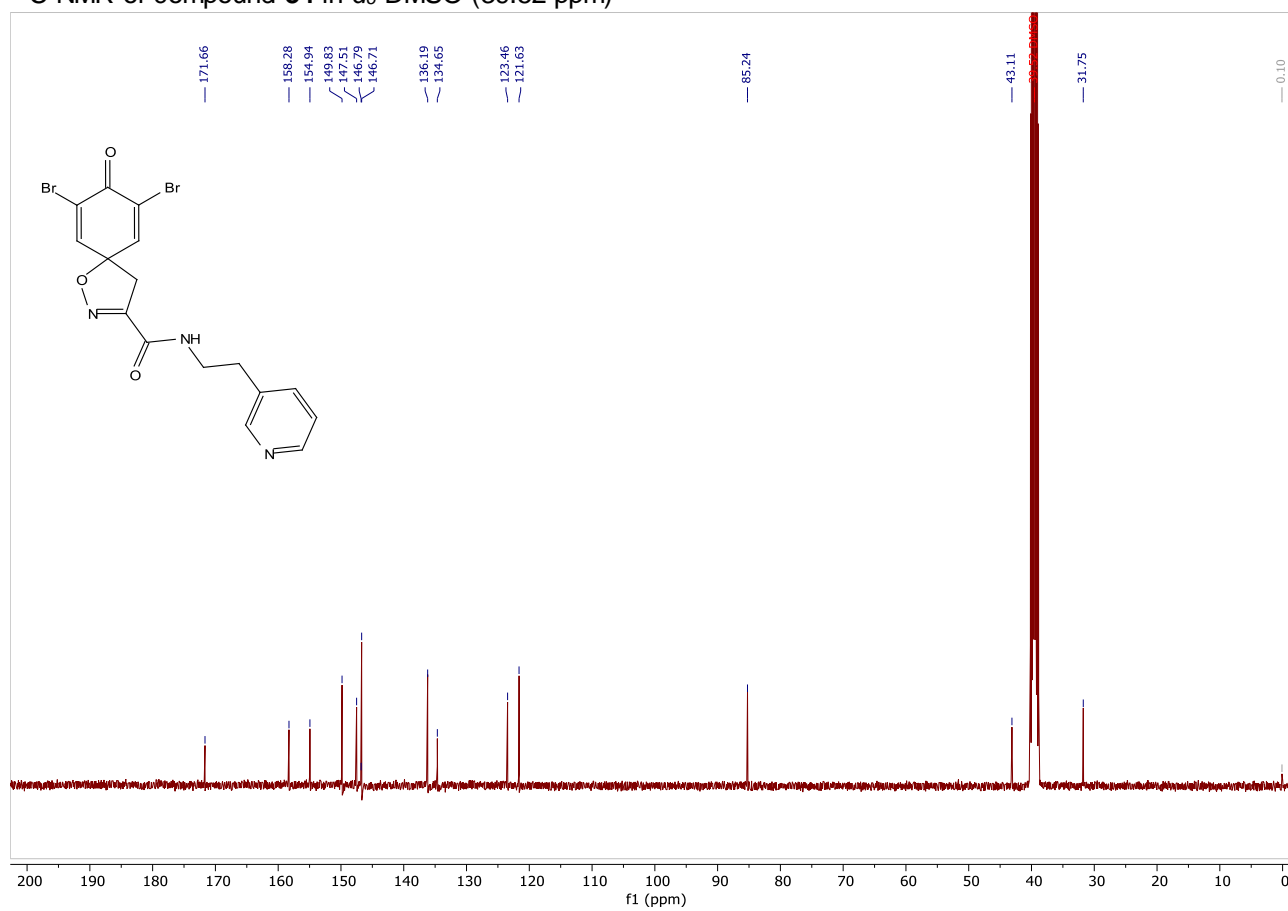

Chemical structure: N#Cc1ccc(NC(=O)C2=CNc3ccccc32)c1

<sup>1</sup>H NMR spectrum (d<sub>6</sub>-Acetone) showing peaks from 3.50 to 8.60 ppm. Integration values are provided below the baseline: 0.98, 1.01, 0.91, 1.00, 1.02, 2.06, 2.02, 2.09, 2.08. A solvent peak for 2.05 d<sub>6</sub>-Acetone is marked at 2.05 ppm.

O=C1C(=O)N1Cc2cccnc2

Chemical structure: O=C1C(=O)N1Cc2cccnc2

<sup>13</sup>C NMR peaks (ppm):

- 184.94
- 159.86
- 155.10
- 150.29
- 149.37
- 145.91
- 136.14
- 135.36
- 129.17
- 124.15
- 83.17
- 44.28
- 41.25
- 30.84 Acetone

<sup>1</sup>H NMR of compound **36** in d<sub>6</sub>-DMSO (2.50 ppm)

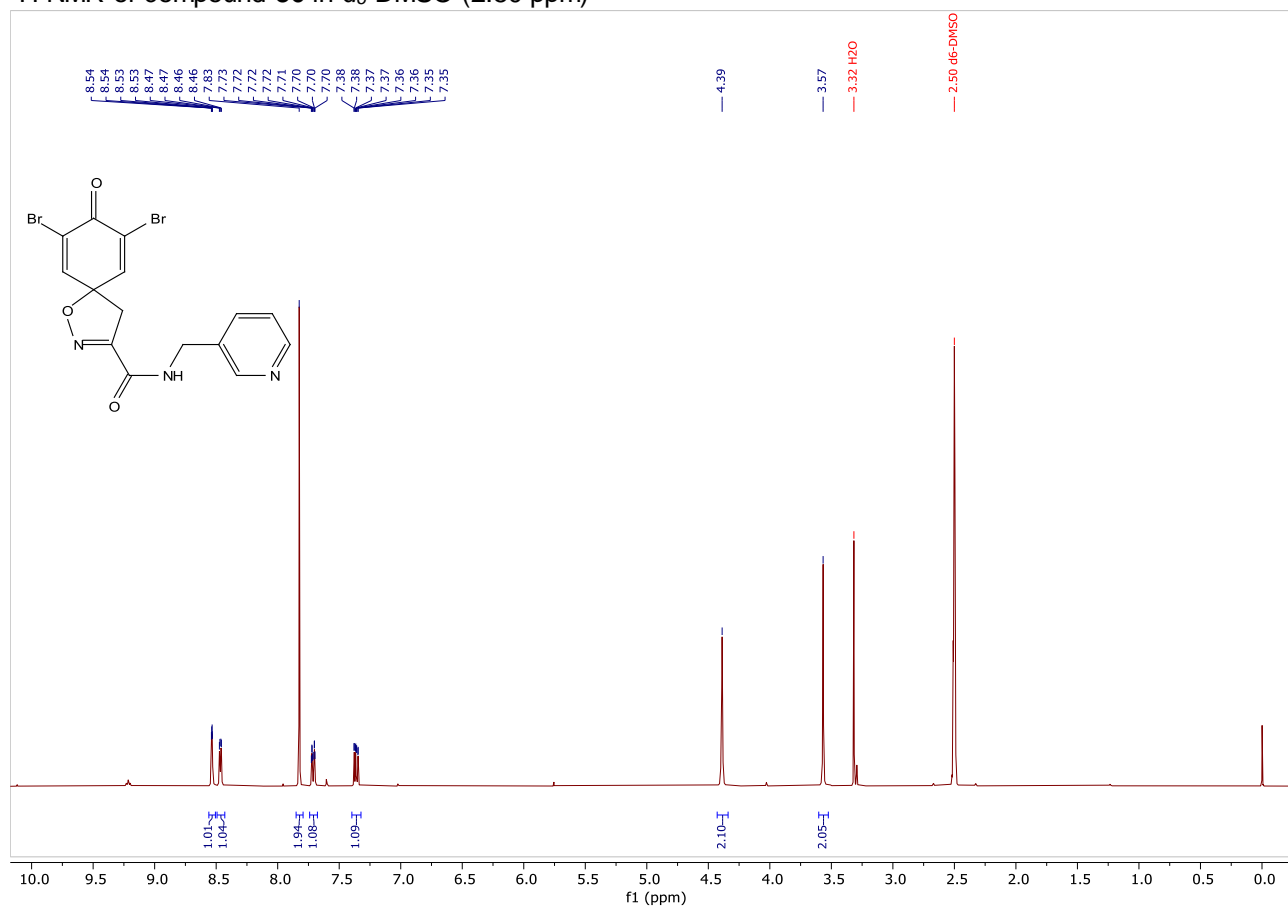

<sup>13</sup>C NMR of compound **36** in d<sub>6</sub>-DMSO (39.52 ppm)

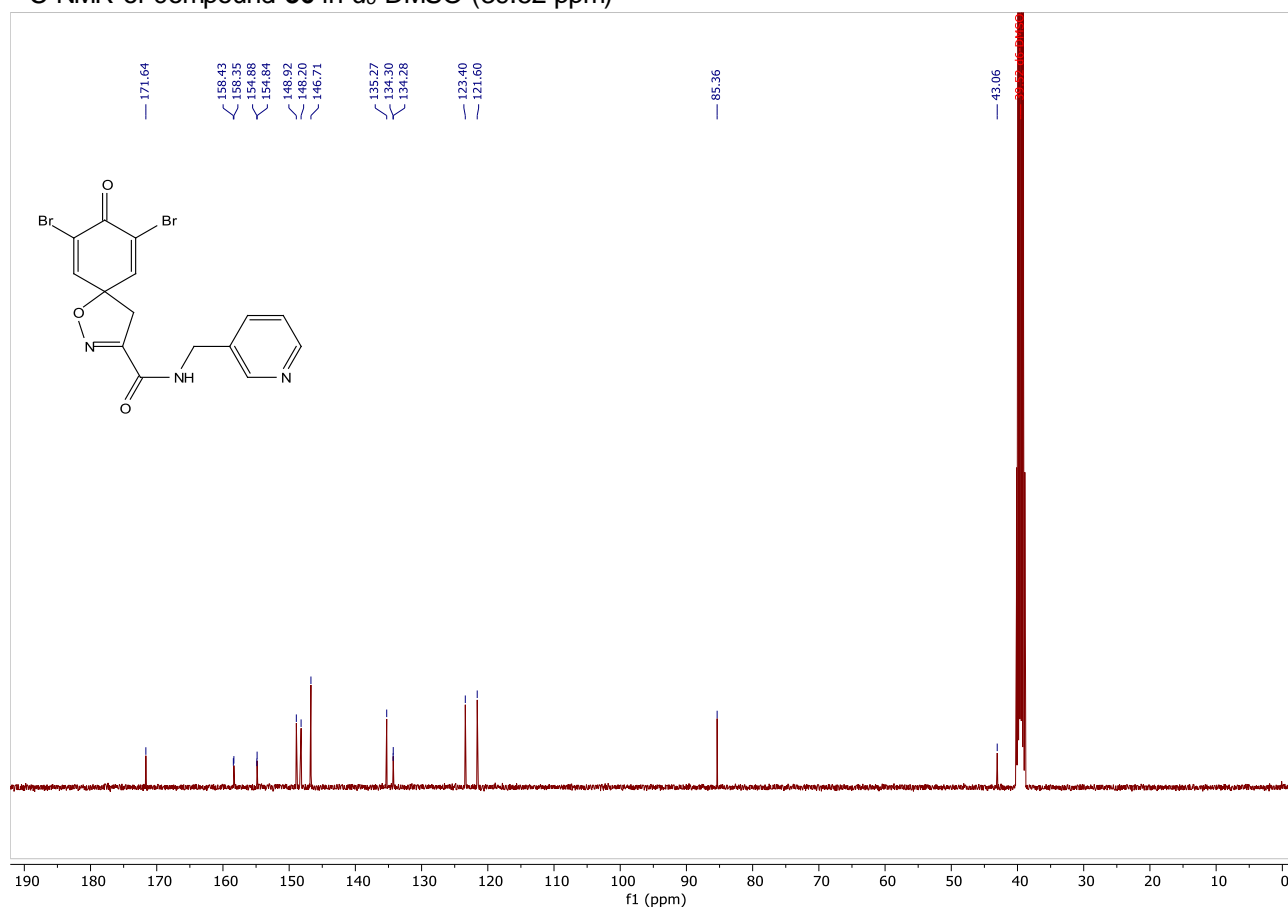

$^1\text{H}$  NMR of compound **37** in  $d_6$ -DMSO (2.50 ppm)

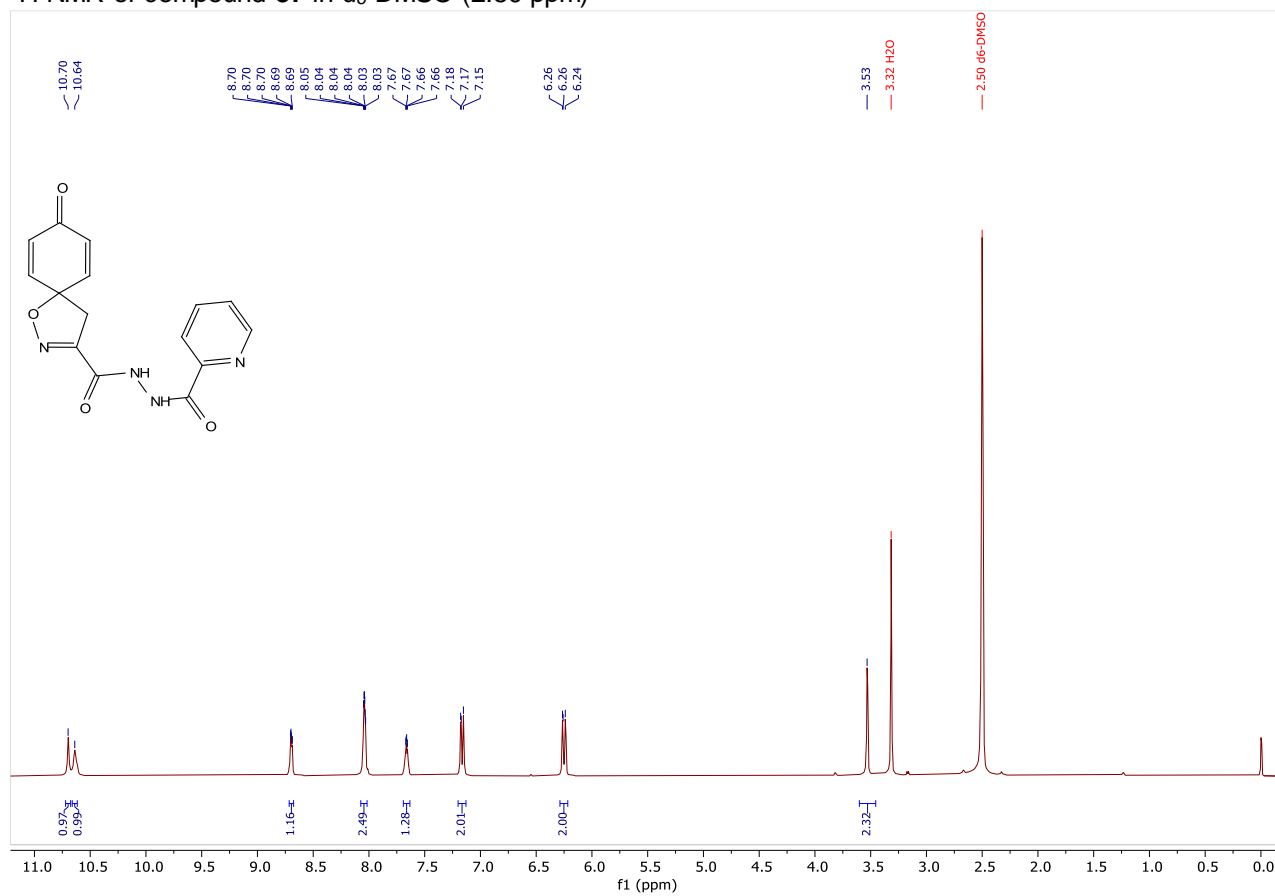

$^{13}\text{C}$  NMR of compound **37** in  $d_6$ -DMSO (39.52 ppm)

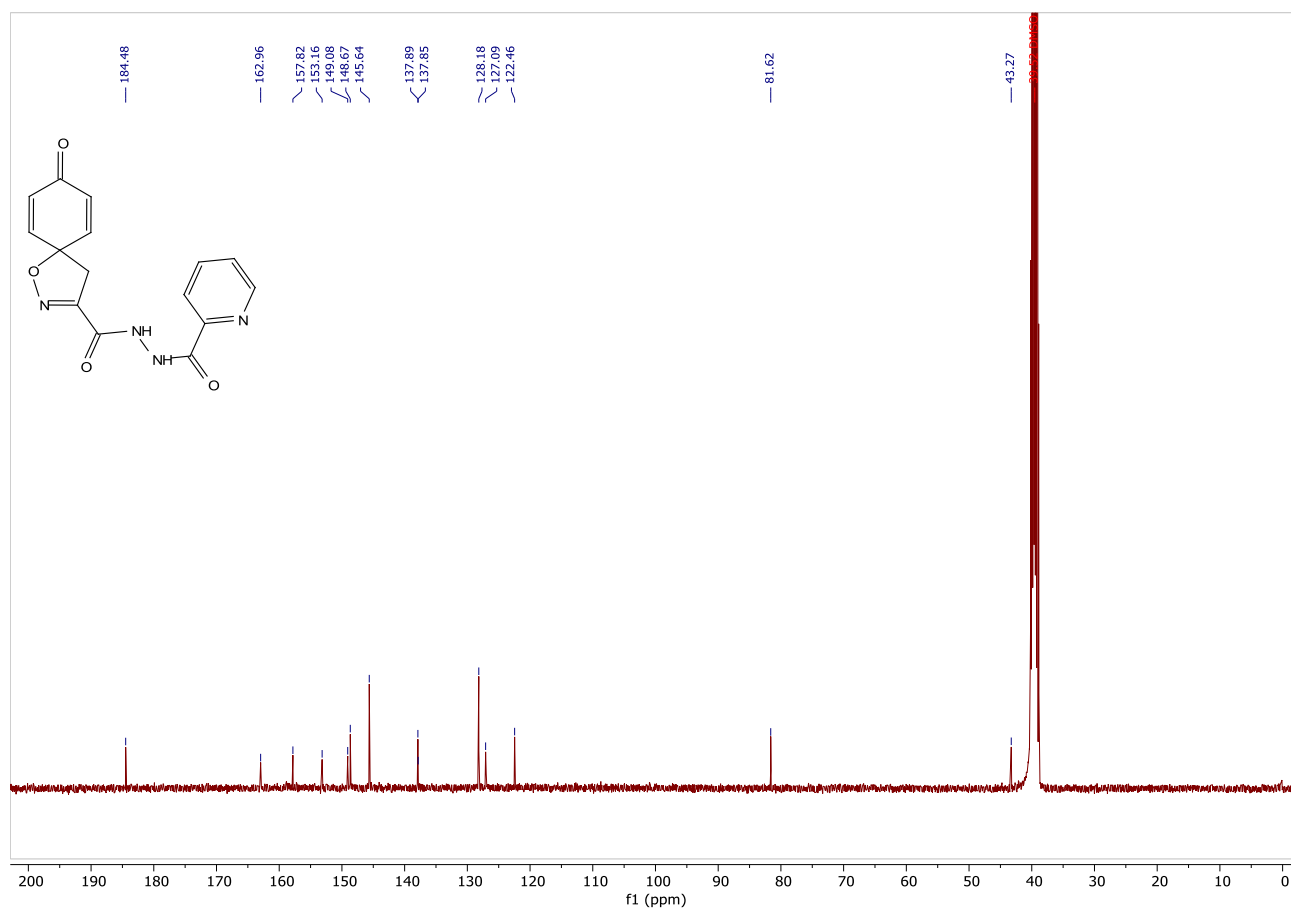

$^1\text{H}$  NMR of compound **38** in  $d_6$ -DMSO (2.50 ppm)

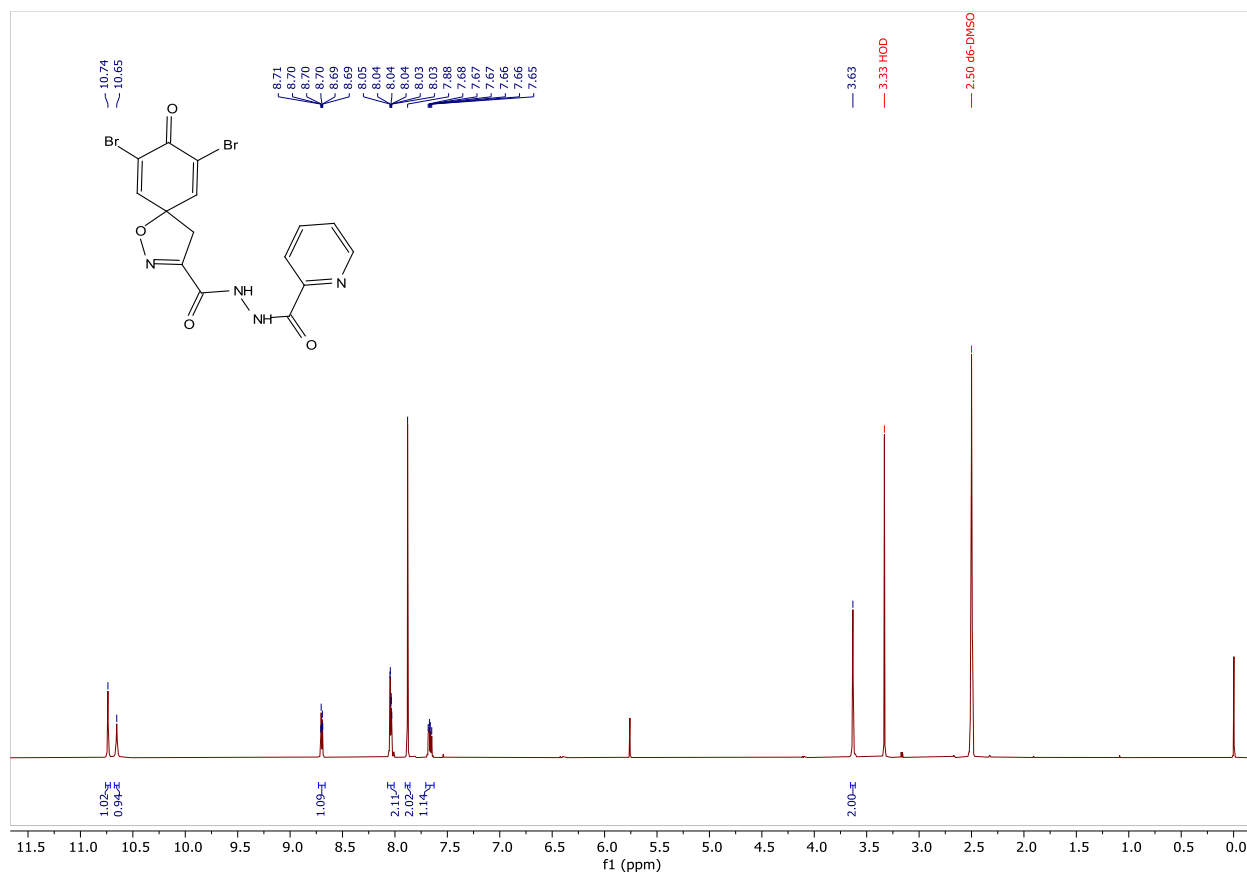

$^{13}\text{C}$  NMR of compound **38** in  $d_6$ -DMSO (39.52 ppm)

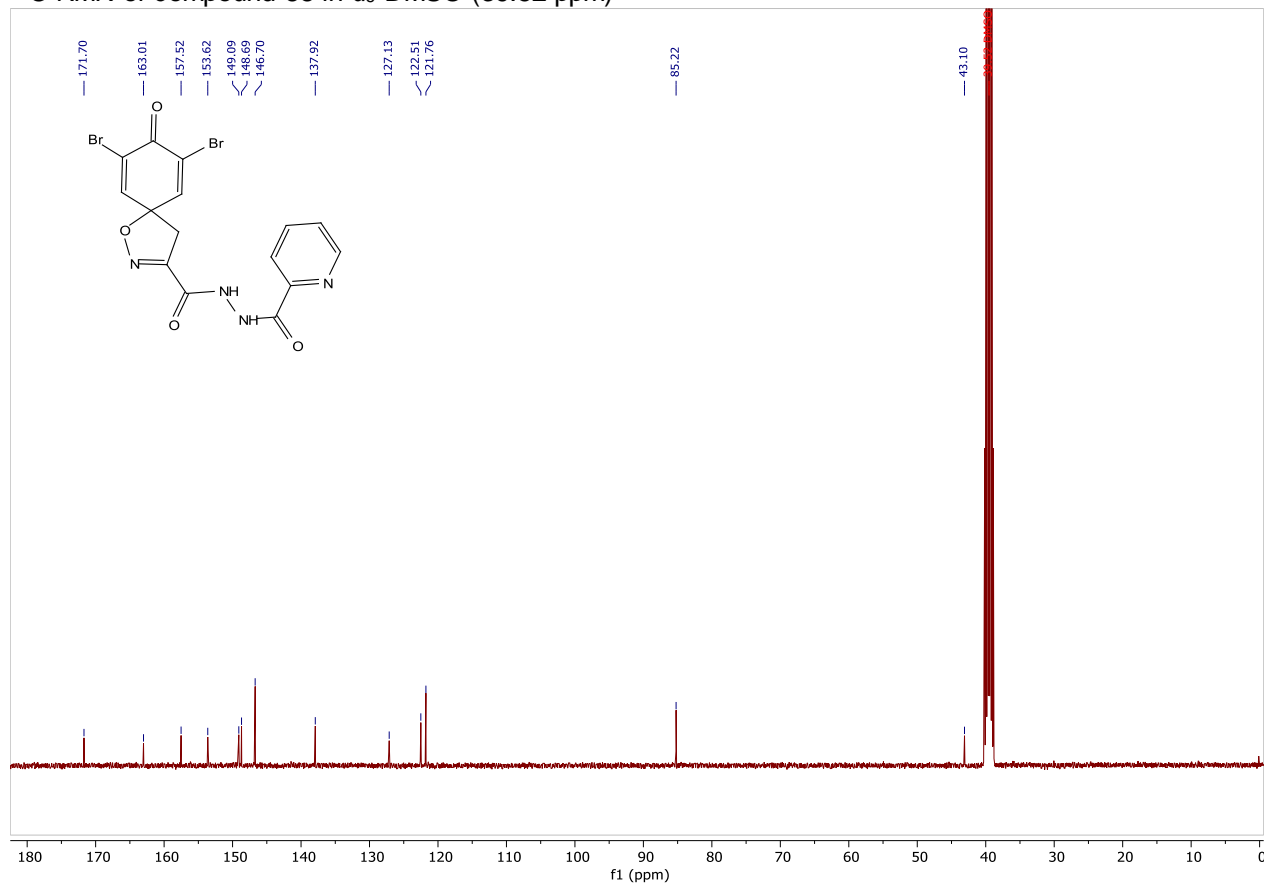

<sup>1</sup>H NMR of compound **39** in d<sub>6</sub>-DMSO (2.50 ppm)

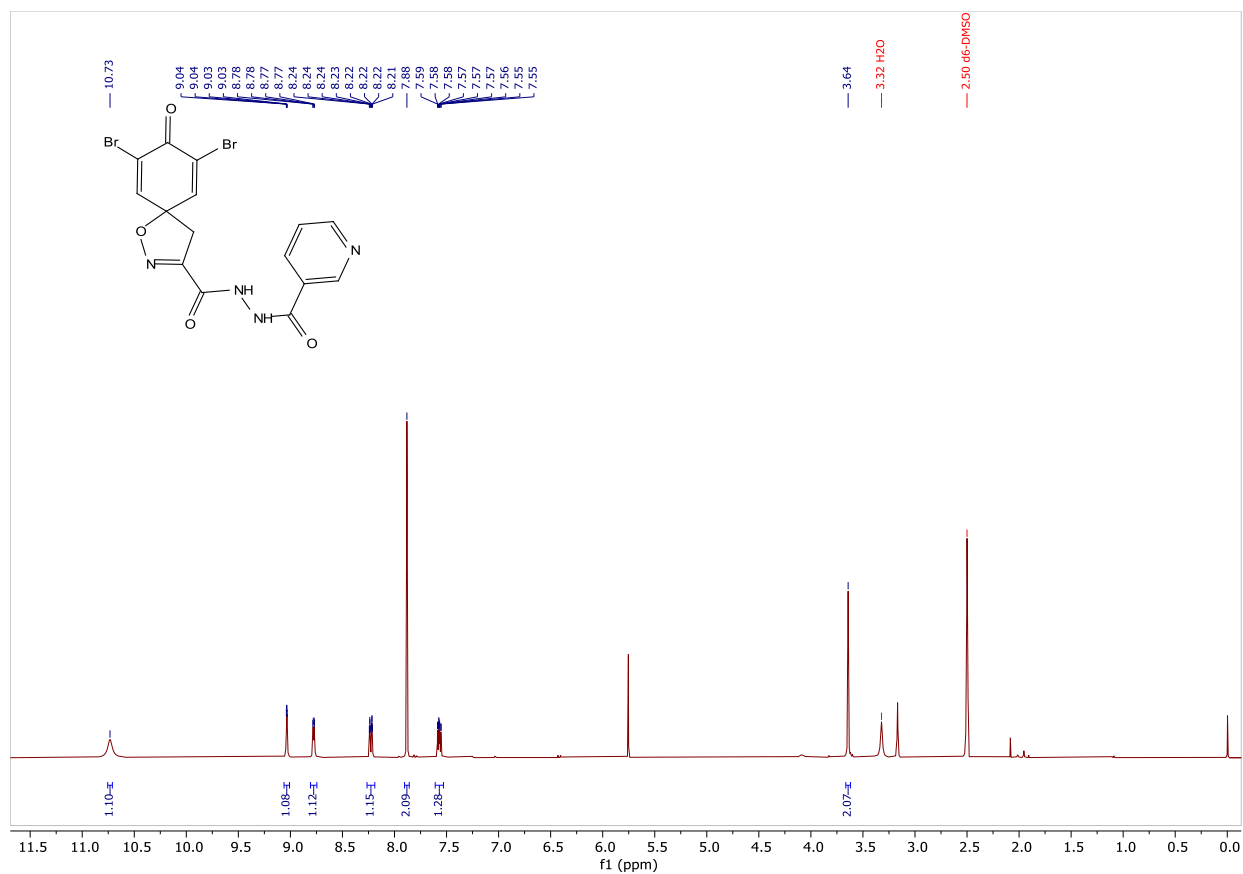

<sup>13</sup>C NMR of compound **39** in d<sub>6</sub>-DMSO (39.52 ppm)

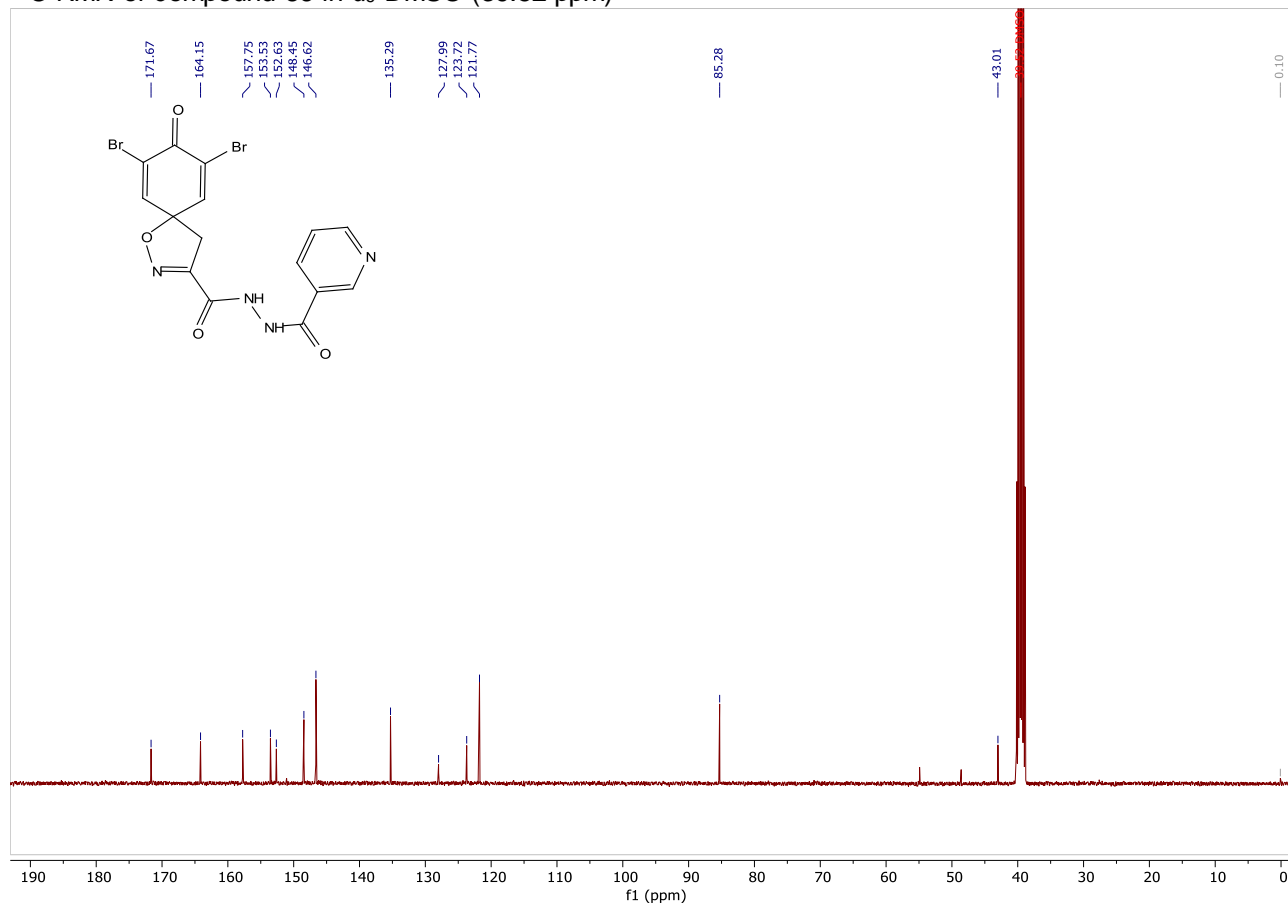

$^1\text{H}$  NMR of compound **40** in  $\text{CDCl}_3$  (7.26 ppm)

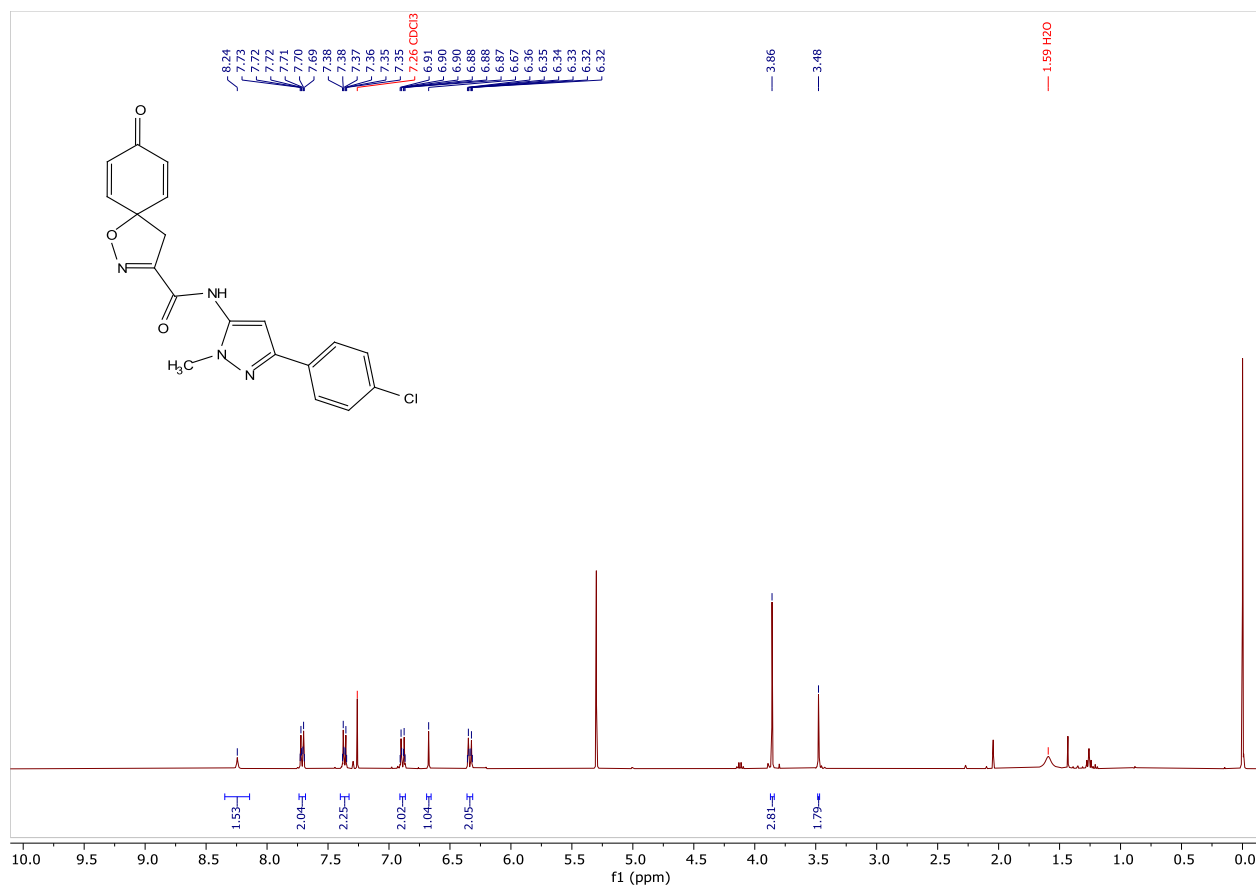

$^{13}\text{C}$  NMR of compound **40** in  $\text{CDCl}_3$  (77.16 ppm)

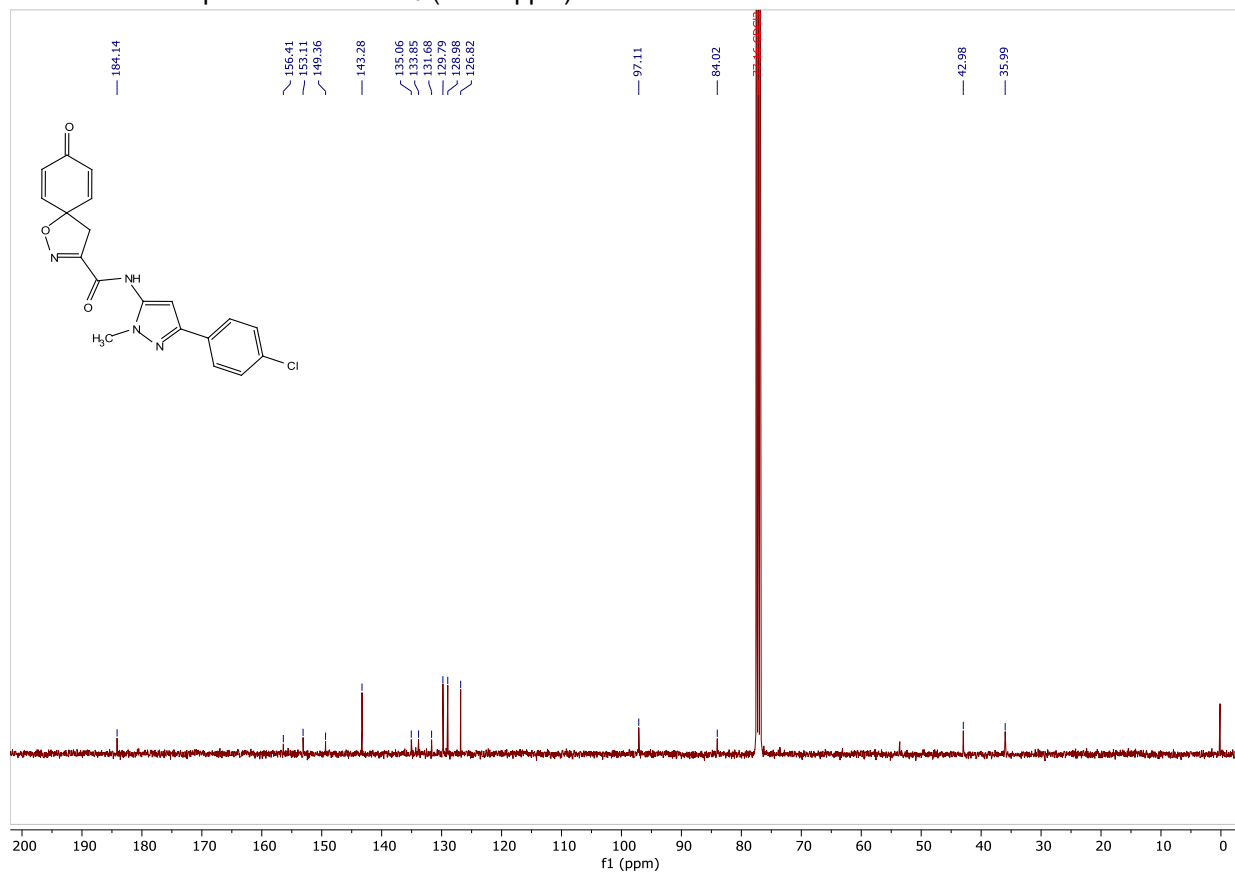



$^1\text{H}$  NMR of compound **41** in  $d_6$ -DMSO (2.50 ppm)

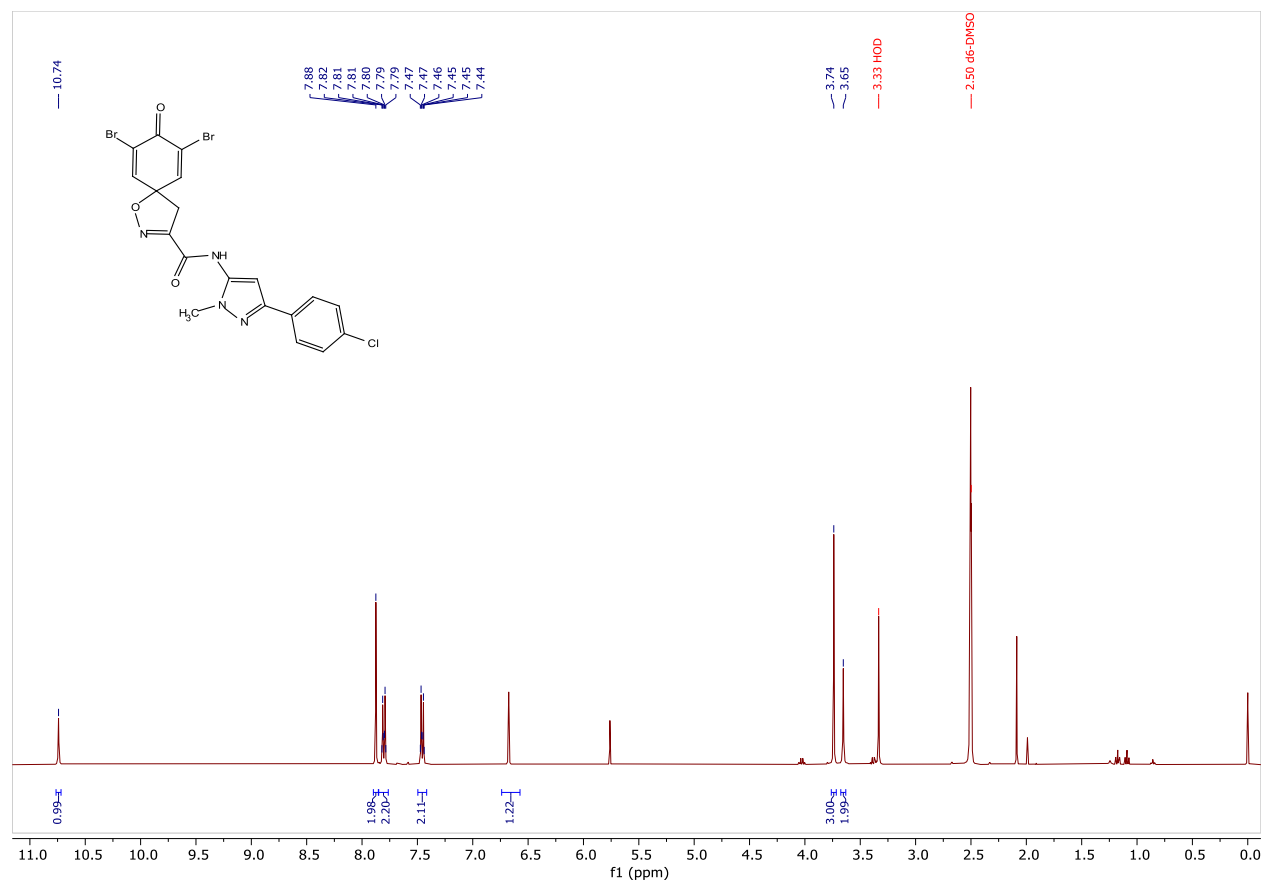

$^{13}\text{C}$  NMR of compound **41** in  $d_6$ -DMSO (39.52 ppm)

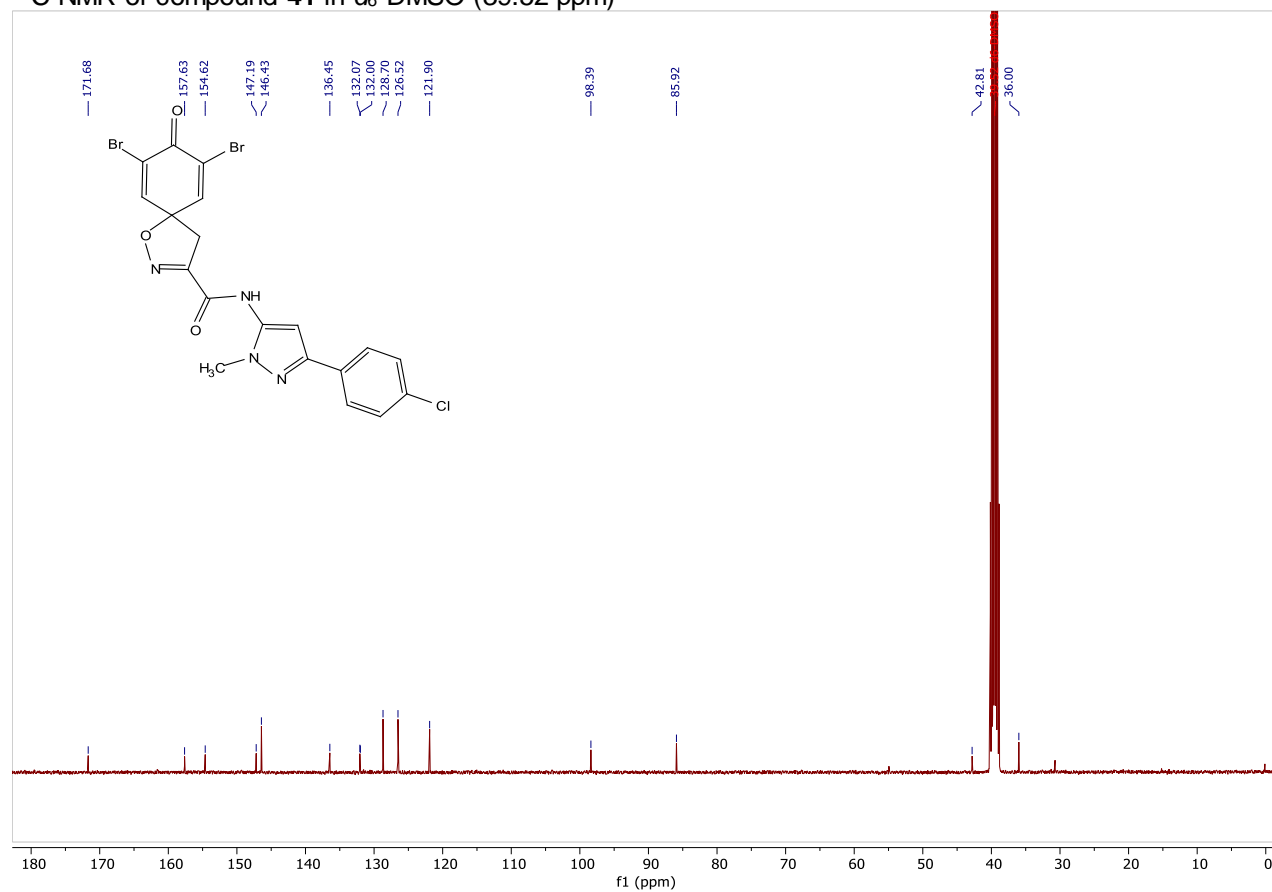

$^1\text{H}$  NMR of compound **42** in  $d_6$ -acetone (2.05 ppm)

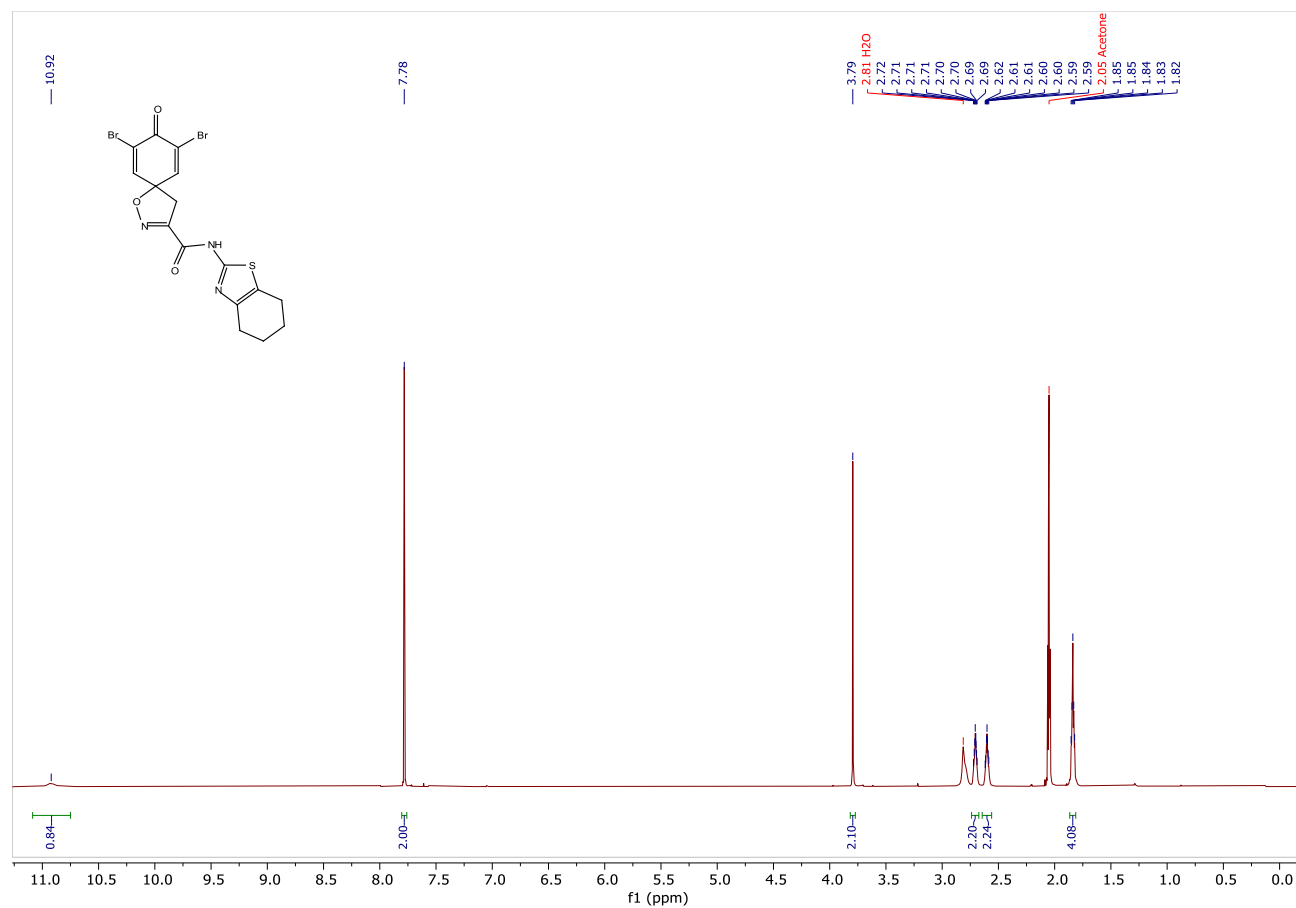

$^{13}\text{C}$  NMR of compound **42** in  $d_6$ -acetone (29.84 ppm)

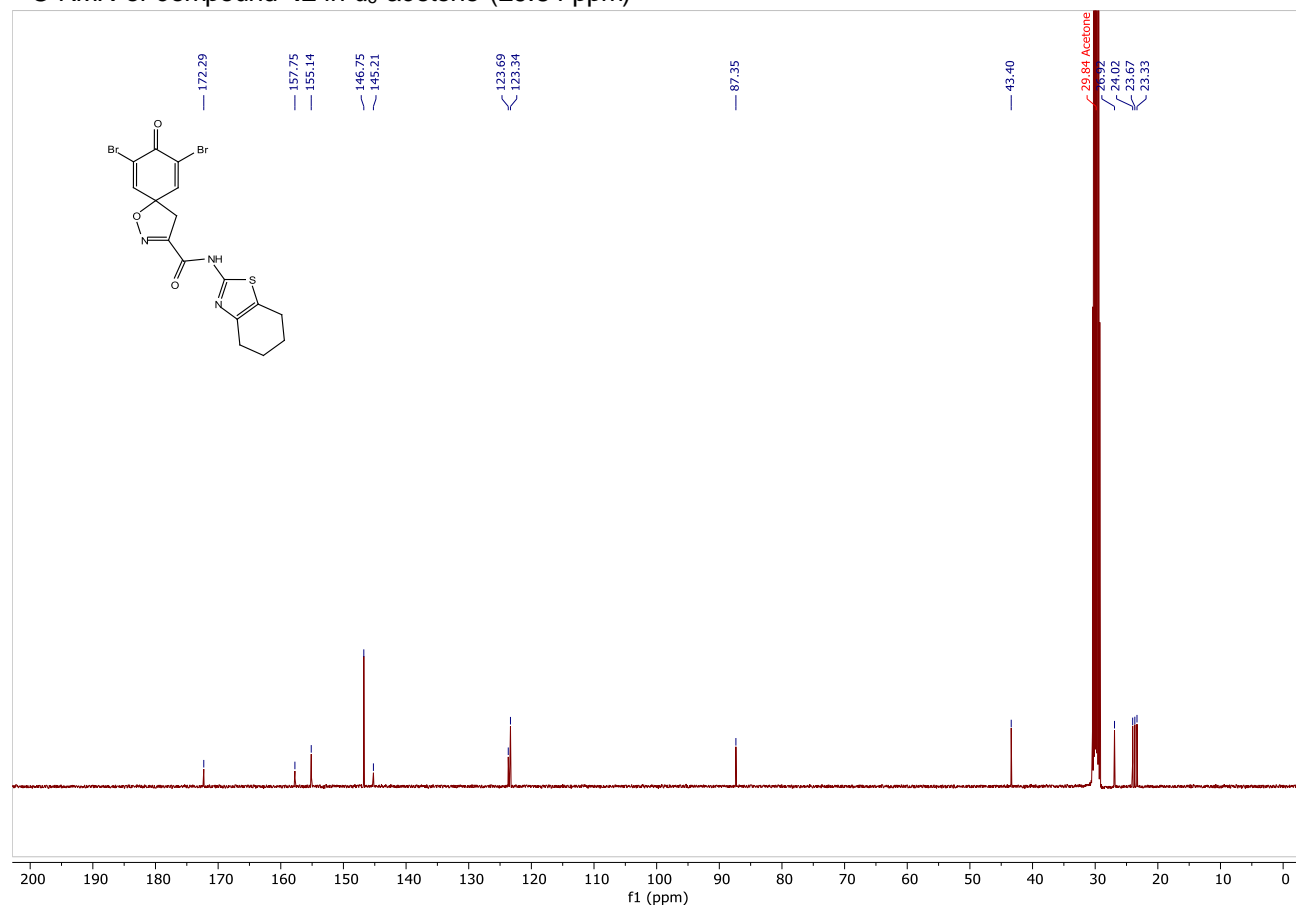

Supplement: s1 [file s1]
